# Supplementary material for: The impact of rare germline variants on human somatic mutation processes
Source: Springer Nature journal article supplement (doi:10.1038/s41467-022-31483-1), 2022-06-28
Supplement: MOESM1 [file 41467_2022_31483_MOESM1_ESM.pdf]

# Supplementary Information

## The impact of rare germline variants on human somatic mutation processes

Mischan Vali Pour, Ben Lehner, Fran Supek

---

# Contents

|                                                                                                                                 |            |
|---------------------------------------------------------------------------------------------------------------------------------|------------|
| <b>List of Figures</b>                                                                                                          | <b>III</b> |
| <b>List of Tables</b>                                                                                                           | <b>IV</b>  |
| <b>1 Supplementary Note</b>                                                                                                     | <b>1</b>   |
| 1.1 <i>SETD2</i> associating in colorectal cancer with $dMMR_{VAE1}$ . . . . .                                                  | 1          |
| 1.2 Genes associating with a somatic feature enriched in brain and liver cancer                                                 | 1          |
| 1.3 Inflation analysis . . . . .                                                                                                | 1          |
| <b>2 Supplementary Figures</b>                                                                                                  | <b>4</b>   |
| 2.1 Inflation Analysis . . . . .                                                                                                | 4          |
| 2.2 Estimation of False Discovery Rates . . . . .                                                                               | 5          |
| 2.3 Power Analysis . . . . .                                                                                                    | 6          |
| 2.4 Subsampling . . . . .                                                                                                       | 8          |
| 2.5 Overview of Discovered Hits and/or Replicated Hits . . . . .                                                                | 12         |
| 2.6 Distributions of Rare Variants . . . . .                                                                                    | 16         |
| 2.7 Network Analysis . . . . .                                                                                                  | 19         |
| 2.8 Somatic Input Features . . . . .                                                                                            | 21         |
| 2.9 Extraction of Independent Components . . . . .                                                                              | 23         |
| 2.10 Extracting Components using Variational Autoencoders . . . . .                                                             | 27         |
| 2.11 Overview of 29 Extracted Components . . . . .                                                                              | 32         |
| 2.12 Correlation between IC9 (Sig.11+19) and telomere features . . . . .                                                        | 34         |
| 2.13 Sample Level Quality Control and Extraction of Individuals of European<br>Ancestry from Common Germline Variants . . . . . | 35         |
| 2.14 Comparison Between WES and WGS Extracted Somatic Features . . . .                                                          | 40         |
| <b>3 Supplementary Tables</b>                                                                                                   | <b>42</b>  |
| 3.1 Replicates Genes - Minimal Distances . . . . .                                                                              | 42         |
| 3.2 Genomic Regions . . . . .                                                                                                   | 43         |
| 3.3 Somatic Components . . . . .                                                                                                | 44         |
| 3.4 Cancer Types . . . . .                                                                                                      | 45         |
| <b>4 Supplementary References</b>                                                                                               | <b>51</b>  |

---

## List of Figures

|    |                                                                                                                     |    |
|----|---------------------------------------------------------------------------------------------------------------------|----|
| 1  | Inflation analysis . . . . .                                                                                        | 4  |
| 2  | Estimation of false discovery rates . . . . .                                                                       | 5  |
| 3  | Power Analysis . . . . .                                                                                            | 6  |
| 4  | Lower-bound of % of variance explained for different known high effect size genes . . . . .                         | 7  |
| 5  | Expected number of replicated hits at FDR 1 % hits . . . . .                                                        | 8  |
| 6  | Subsampling of validation cohort . . . . .                                                                          | 8  |
| 7  | Number of replicated associations between <i>BRCA1</i> and dHR_ICA in pan-cancer in subsampling analysis . . . . .  | 9  |
| 8  | Number of replicated associations between <i>BRCA2</i> and dHR_ICA in pan-cancer in subsampling analysis . . . . .  | 9  |
| 9  | Number of replicated associations between <i>PALB2</i> and dHR_ICA in pan-cancer in subsampling analysis . . . . .  | 10 |
| 10 | Number of replicated associations between <i>MLH1</i> and dMMR_ICA in pan-cancer in subsampling analysis . . . . .  | 10 |
| 11 | Number of replicated associations between <i>MSH2</i> and dMMR_VAE1 in pan-cancer in subsampling analysis . . . . . | 11 |
| 12 | Overview of number of discovered and validated hits . . . . .                                                       | 12 |
| 13 | Replicated hits at a FDR of 2 % . . . . .                                                                           | 13 |
| 14 | Number of individuals with rare pLOF variants (and somatic LOH) in genes replicating at a FDR of 2 % . . . . .      | 14 |
| 15 | Seven genes associated with a somatic component in $\geq 1$ cancer type .                                           | 15 |
| 16 | Overall occurrence of pLOF variants and pLOF variants + somatic LOH in the cohorts . . . . .                        | 16 |
| 17 | Number of individuals carrying a rare pLOF variant in one of the genes replicating at a FDR of 2 % . . . . .        | 17 |
| 18 | Frequency of pLOF variants in analyzed cancer dataset vs. control samples in gnomAD v2.1 . . . . .                  | 18 |
| 19 | Network analysis (HumanNet) supports the role of rare germline variation in somatic mutational processes . . . . .  | 19 |
| 20 | Gene prioritization based on protein interactions with known dHR/dMMR genes within network . . . . .                | 20 |
| 21 | Gene prioritization based on strength of protein interactions to neighbours within network . . . . .                | 20 |
| 22 | Distribution of all 56 somatic features in TCGA -WES . . . . .                                                      | 21 |
| 23 | Distribution of all 56 somatic features in PCAWG_Hartwig -WGS . . . . .                                             | 22 |
| 24 | Finding the optimal number of independent components . . . . .                                                      | 23 |

---

|    |                                                                                                                                                       |    |
|----|-------------------------------------------------------------------------------------------------------------------------------------------------------|----|
| 25 | Selection of 15 independent components for further analysis . . . . .                                                                                 | 24 |
| 26 | Pearson correlations between all 30 independent components which were extracted using 15 components and k-medoid clustering with k = 30               | 24 |
| 27 | Overview of strongest contributing features to the independent components . . . . .                                                                   | 25 |
| 28 | Several independent component scores were enriched in specific tissue of origins . . . . .                                                            | 26 |
| 29 | Finding the optimal hyperparameters for the variational autoencoder . .                                                                               | 27 |
| 30 | Correlation with biologically relevant components increased with increasing number of components extractions and quickly reached saturation . . . . . | 28 |
| 31 | Number of hidden layers barely made a difference on the extracted components in the latent space of the variational autoencoder . . . . .             | 28 |
| 32 | Some VAE-derived components were not captured in the independent component analysis . . . . .                                                         | 29 |
| 33 | Overview of strongest contributing features to the variational autoencoder derived components . . . . .                                               | 30 |
| 34 | Several VAE-derived component scores were enriched in specific tissue of origins . . . . .                                                            | 31 |
| 35 | Distribution of all 29 somatic components in TCGA -WES . . . . .                                                                                      | 32 |
| 36 | Distribution of all 29 somatic components in PCAWG_Hartwig -WGS . .                                                                                   | 33 |
| 37 | Pearson correlation between IC9 (Sig.11+19) and telomere features . .                                                                                 | 34 |
| 38 | Identification of individuals with outlying total number of variants, outlying heterozygosity rate or high relatedness in TCGA -WES. . . . .          | 35 |
| 39 | Identification of individuals with outlying total number of variants, outlying heterozygosity rate or high relatedness in PCAWG_Hartwig -WGS . . .    | 36 |
| 40 | Principal component analysis on common germline variants in TCGA -WES . . . . .                                                                       | 37 |
| 41 | Principal component analysis on common germline variants in PCAWG_Hartwig -WGS . . . . .                                                              | 38 |
| 42 | Extraction of European individuals in TCGA -WES . . . . .                                                                                             | 39 |
| 43 | Extraction of European individuals in PCAWG_Hartwig -WGS . . . . .                                                                                    | 40 |
| 44 | Comparison between WES and WGS extracted somatic features in TCGA                                                                                     | 41 |

## List of Tables

|   |                                                                                                   |    |
|---|---------------------------------------------------------------------------------------------------|----|
| 1 | Closest distance between newly replicated genes at a FDR of 2% and known dMMR/dHR genes . . . . . | 42 |
|---|---------------------------------------------------------------------------------------------------|----|

---

|    |                                                                       |    |
|----|-----------------------------------------------------------------------|----|
| 2  | Covered Genomic Regions with WES and WGS Masks . . . . .              | 43 |
| 3  | Somatic Component Names . . . . .                                     | 44 |
| 4  | TCGA Study Abbreviation . . . . .                                     | 45 |
| 5  | PCAWG Study Abbreviation . . . . .                                    | 46 |
| 6  | Cancer Type Names . . . . .                                           | 46 |
| 7  | Overview of sample sizes . . . . .                                    | 47 |
| 8  | Matching GTEx tissues with cancer types in TCGA for PEXT . . . . .    | 48 |
| 9  | Matching GTEx tissues with cancer types in PCAWG for PEXT . . . . .   | 49 |
| 10 | Matching GTEx tissues with cancer types in Hartwig for PEXT . . . . . | 50 |

---

# 1 Supplementary Note

## 1.1 *SETD2* associating in colorectal cancer with dMMR<sub>VAE1</sub>

There is considerable support for the association of *SETD2* with dMMR from previous studies:

1. Biochemistry: the *SETD2* protein deposits the histone mark H3K36me3, which can recruit the MSH6 subunit of the MMR complex MutSa to chromatin<sup>8</sup>.
2. Experiments on human cell lines show that removing the *SETD2* protein can cause microsatellite instability<sup>8</sup> and that it changes the distributions of mutation rates with respect to H3K36me-marked regions<sup>9</sup>.
3. In human cancer data tumours with mutations in *SETD2* (double deletion or somatic mutation) have a dMMR-associated mutation phenotype<sup>10</sup>.

In our opinion, these prior studies would be very strong evidence to support this dMMR association in *SETD2* germline variants as well.

## 1.2 Genes associating with a somatic feature enriched in brain and liver cancer

Beyond the dHR and dMMR-related components, the component associated with the largest number of genes was component Sig.11+19, which is enriched for SNV signatures RefSig 11 and 19<sup>1</sup> (Fig. 2d). This component is enriched in brain and liver cancers (Supplementary Fig. 37). Signature 11 has been reported to be enriched in brain cancers, associated with temozolomide treatment<sup>2</sup>, and is similar to the signature which results from the treatment with the DNA methylating agent 1,2-Dimethylhydrazine<sup>3</sup>. The cause of signature 19 is unknown and it has been mostly identified in brain, liver and blood cancers<sup>1</sup>. At a FDR of 1%, the genes *ASCC2*, *FANCC*, *NCAPG2* and *POT1* associated with this component in the pan-cancer analysis, as do *NUDT7*, *PIF1*, and *SOS1* at a more permissive 2% FDR. *POT1* and *PIF1* interact with each other<sup>4</sup> (Extended Data Fig. 6e) and both have functions in telomere maintenance<sup>5,6</sup>, but we did not detect any correlation between this component and reported telomere features<sup>7</sup> (Supplementary Fig. 37).

## 1.3 Inflation analysis

The tests showed little evidence of inflation when considering models in which at least 100 genes were tested. Overall there was slight deflation (median: 0.78; 1st quartile:

---

0.55; 3rd quartile: 0.97; max: 2.27) (Supplementary Fig. 1), suggesting conservatively biased test results. Inflated cases were discarded (cut-off at  $\lambda \geq 1.5$ ; 19 out of 1,909 discarded).

---

## 2 Supplementary Figures

### 2.1 Inflation Analysis

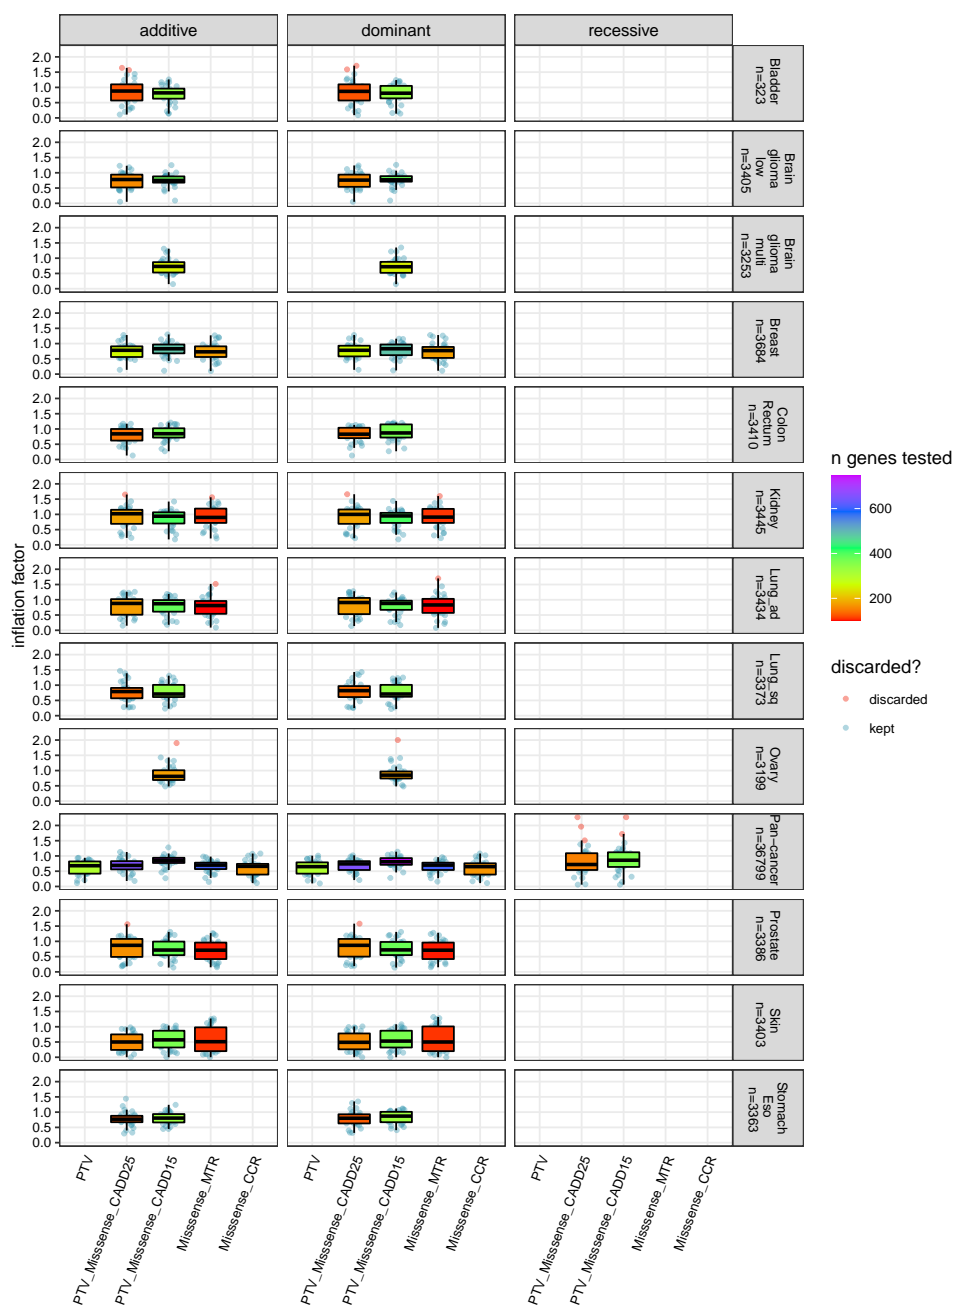

**Supplementary Fig. 1: Inflation analysis.** Overview of inflation factors (y-axis) across rare pLoF variant sets (x-axis), across cancer types (rows), and across models of inheritance (columns). Color code for box plots illustrates the number of tested genes for the respective scenario. Inflation factors were only calculated when at least 100 genes were tested, and inflation factors  $\geq 1.5$  were discarded (red point). Each data point represents the calculated inflation factor for one somatic component. Number of individuals in each cancer type shown in subtitle of each plot. Centre of each boxplot shows median value, bounds of box at 25th and 75th percentiles and minimum and maximum extend to the smallest and largest value, but not more than 1.5 times the interquartile range.

## 2.2 Estimation of False Discovery Rates

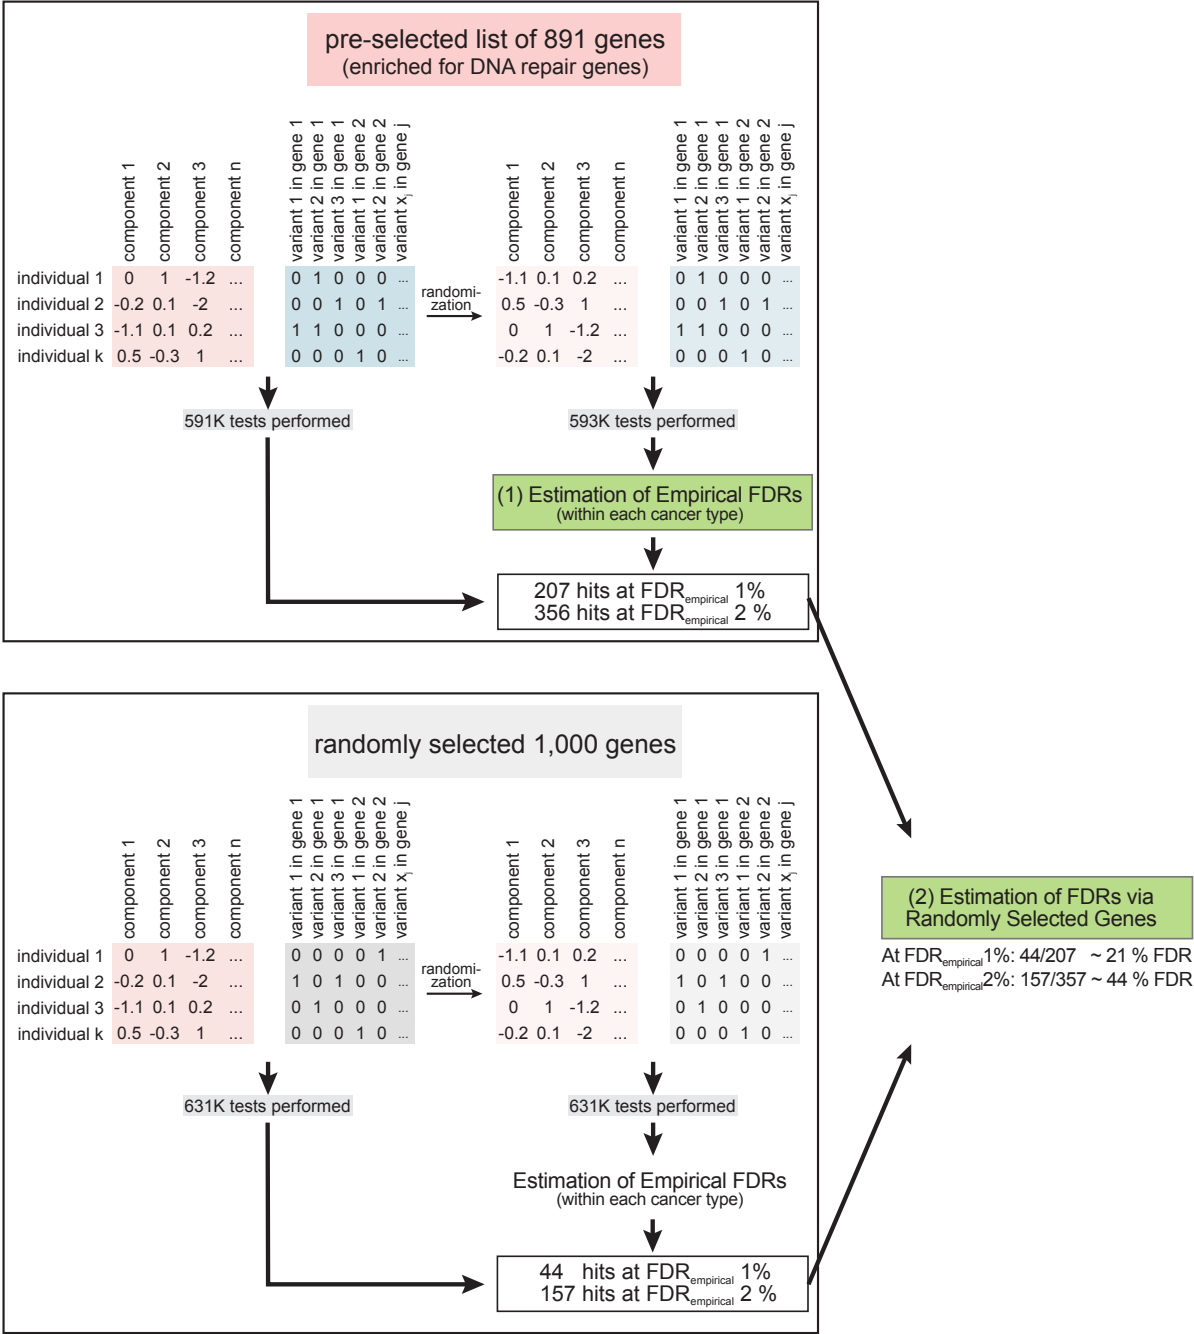

**Supplementary Fig. 2: Estimation of false discovery rates.** Schematic illustration of the approach. Firstly, testing was performed using the pre-selected 891 genes. Then, randomization was performed shuffling the rows within cancer types, effectively breaking down the link between individuals and somatic components. Testing was performed with the randomized somatic component matrix as well and empirical FDRs were calculated based on the randomization for each cancer type (top half of plot). The same approach was repeated with a random set of 1,000 genes after excluding the pre-selected gene list and any gene interacting with a gene from the pre-selected gene list (bottom half of plot). The number of genes replicating via the randomly selected list of genes at a specific FDR was divided by the number of genes replicating with the pre-selected list to get a conservative FDR estimate.

## 2.3 Power Analysis

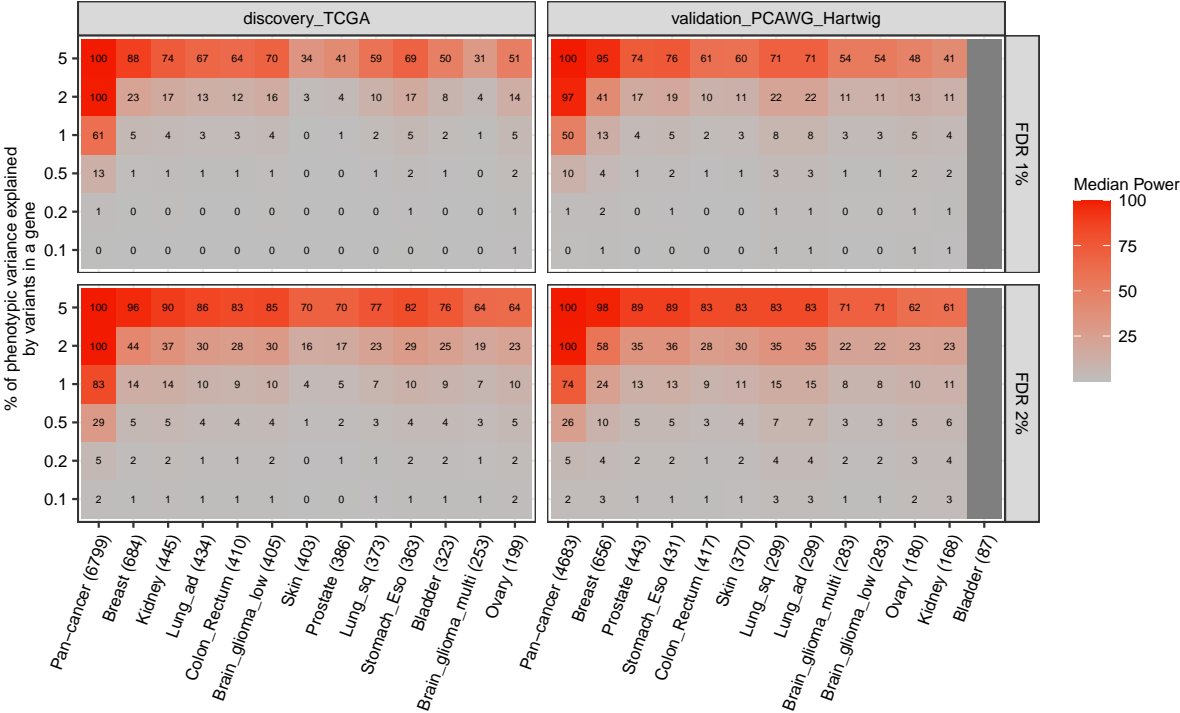

**Supplementary Fig. 3: Power Analysis.** Power analysis was performed with PAGEANT<sup>11</sup> for SKAT. Statistical power depending on the sample size (shown by different cancer types and pan-cancer on x-axis), % of phenotypic variance explained by variants in a gene (y-axis), and threshold for calling significance (1st row for 1 % FDR and 2nd row for 2 % FDR). Median of statistical power shown by color code and rounded numbers in each tile.

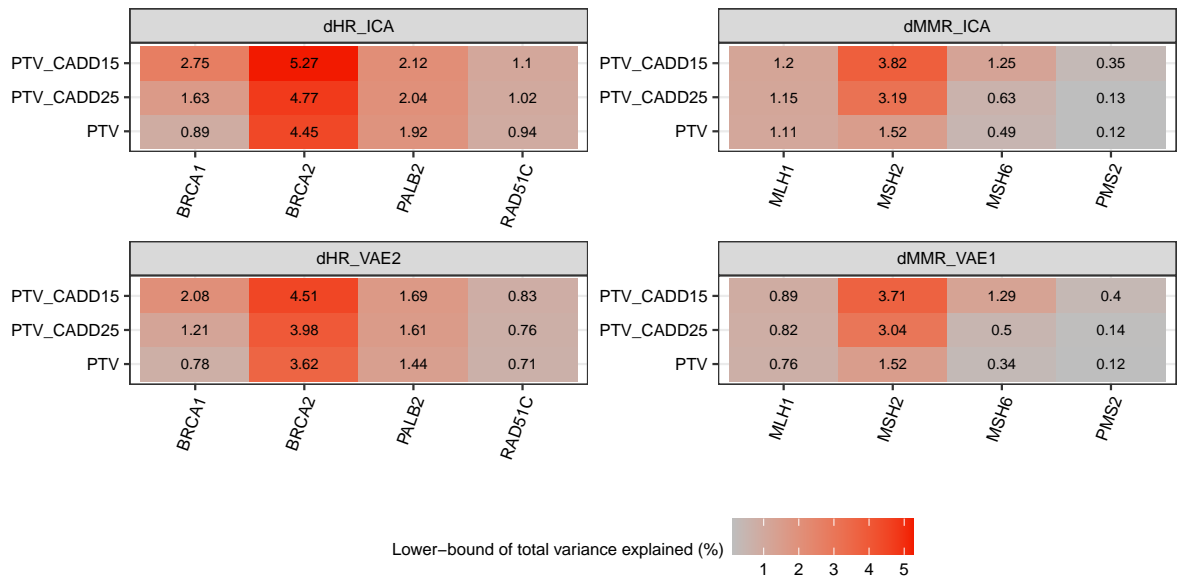

**Supplementary Fig. 4: Lower-bound of % of variance explained for different known high effect size genes.** Total variance explained ( $R^2$ ) was estimated in a multiple linear regression (see Methods) for different gene-phenotype-variant set combinations using the dominant model in the pan-cancer analysis on the discovery cohort. Estimates can be used as reference points for interpreting the power analysis.

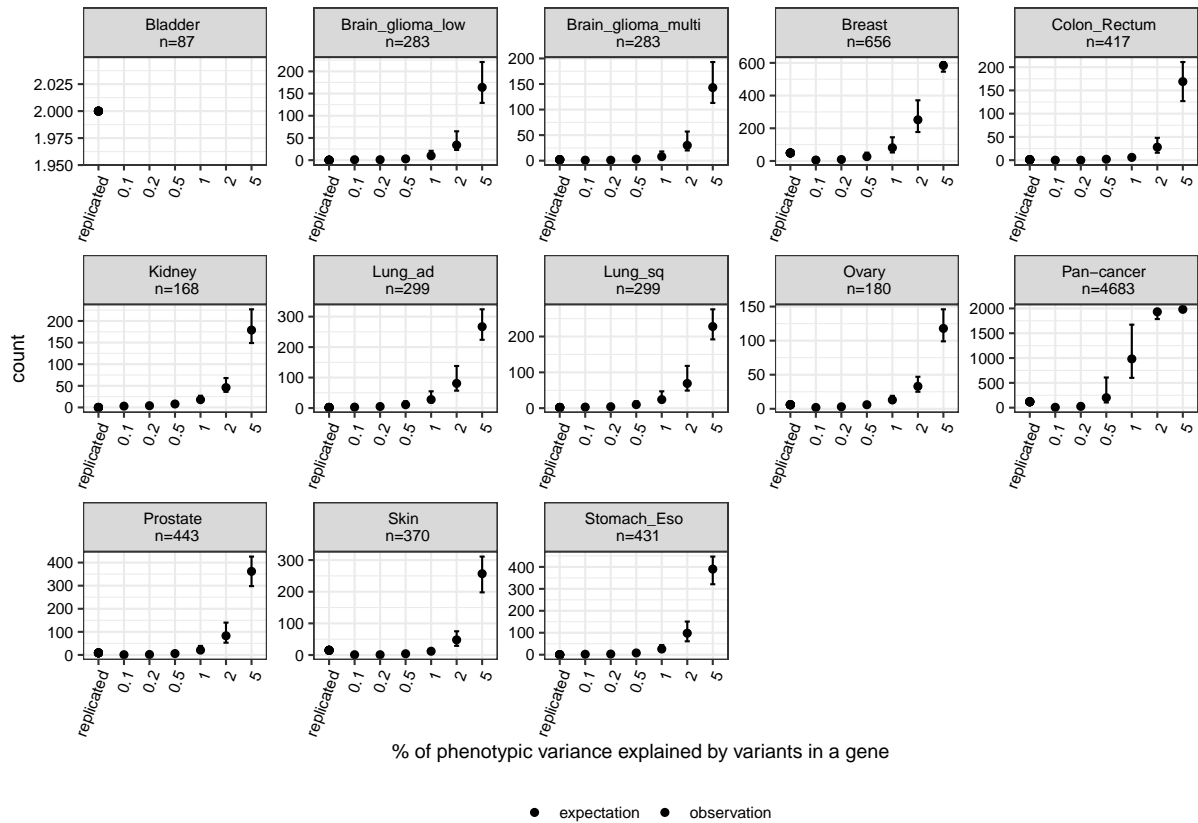

**Supplementary Fig. 5: Expected number of replicated hits at FDR 1 % hits.** Shown number of replicated hits in the validation cohort at a FDR of 1 % (red bar) in each cancer type and pan-cancer. Data points show expected number of replicated hits based on the estimated median statistical power for different %es of explained variance by variants in a gene. Error bars reflect the expected numbers based on the 25th and 75th quantile of the estimated statistical power with PAGEANT<sup>11</sup>. Number of individuals in each cancer type shown in subtitle of each plot.

## 2.4 Subsampling

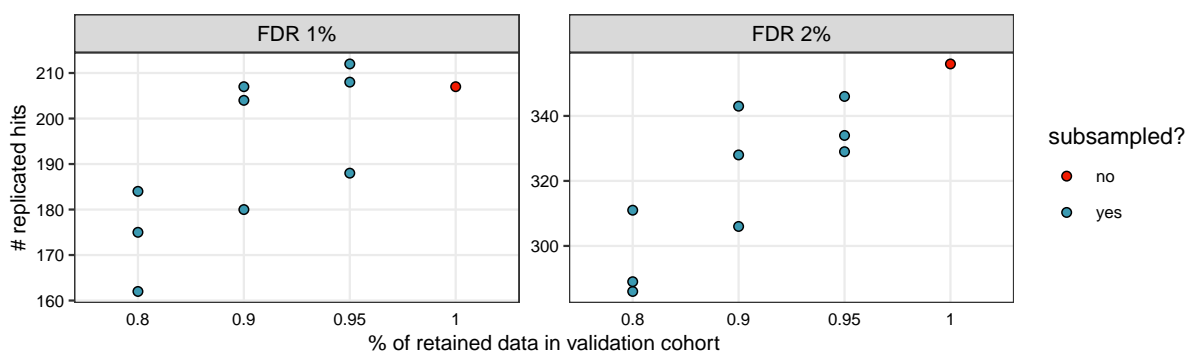

**Supplementary Fig. 6: Subsampling of validation cohort.**

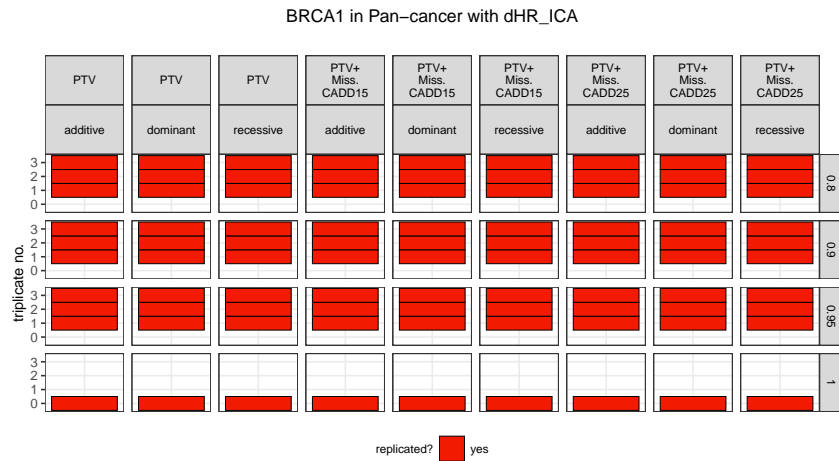

**Supplementary Fig. 7: Number of replicated associations between *BRCA1* and dHR\_ICA in pan-cancer in subsampling analysis.** Showing replicated hits (red tile) for each pLoF rare variant set and model of inheritance combination (columns) for each subsampling (rows). Data of the validation cohort was randomly subsampled retaining 95, 90, and 80 % of the data three times for each subsampling (triplicate number on y-axis). Bottom row showing associations without any subsampling (100 % of the data).

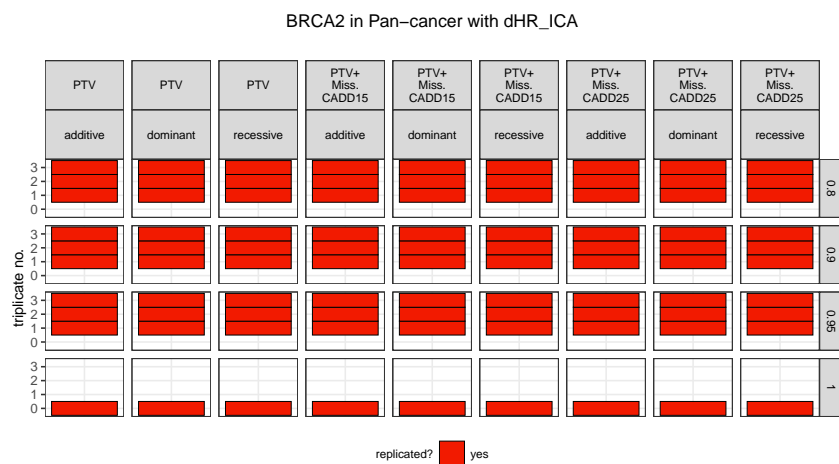

**Supplementary Fig. 8: Number of replicated associations between *BRCA2* and dHR\_ICA in pan-cancer in subsampling analysis.** Showing replicated hits (red tile) for each pLoF rare variant set and model of inheritance combination (columns) for each subsampling (rows). Data of the validation cohort was randomly subsampled retaining 95, 90, and 80 % of the data three times for each subsampling (triplicate number on y-axis). Bottom row showing associations without any subsampling (100 % of the data).

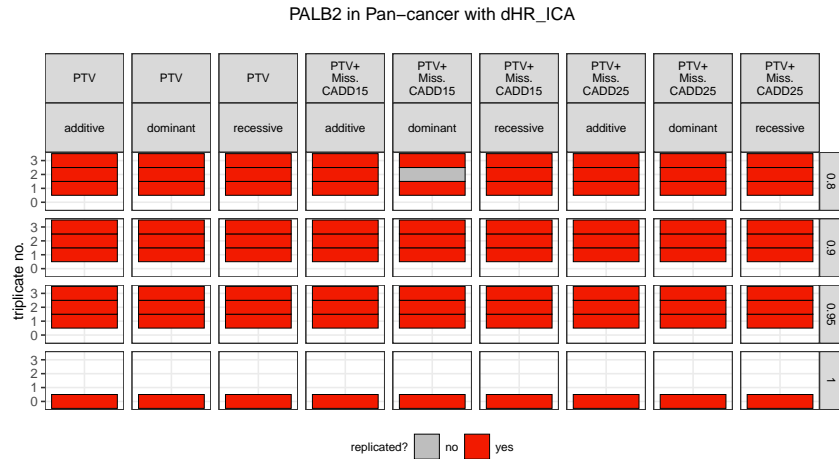

**Supplementary Fig. 9: Number of replicated associations between *PALB2* and *dHR\_ICA* in pan-cancer in subsampling analysis.** Showing replicated hits (red tile) for each pLoF rare variant set and model of inheritance combination (columns) for each subsampling (rows). Data of the validation cohort was randomly subsampled retaining 95, 90, and 80 % of the data three times for each subsampling (triplicate number on y-axis). Bottom row showing associations without any subsampling (100 % of the data).

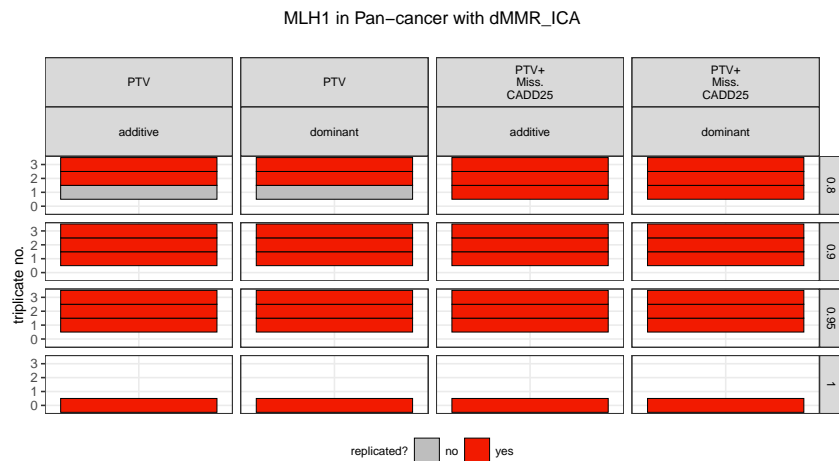

**Supplementary Fig. 10: Number of replicated associations between *MLH1* and *dMMR\_ICA* in pan-cancer in subsampling analysis.** Showing replicated hits (red tile) for each pLoF rare variant set and model of inheritance combination (columns) for each subsampling (rows). Data of the validation cohort was randomly subsampled retaining 95, 90, and 80 % of the data three times for each subsampling (triplicate number on y-axis). Bottom row showing associations without any subsampling (100 % of the data).

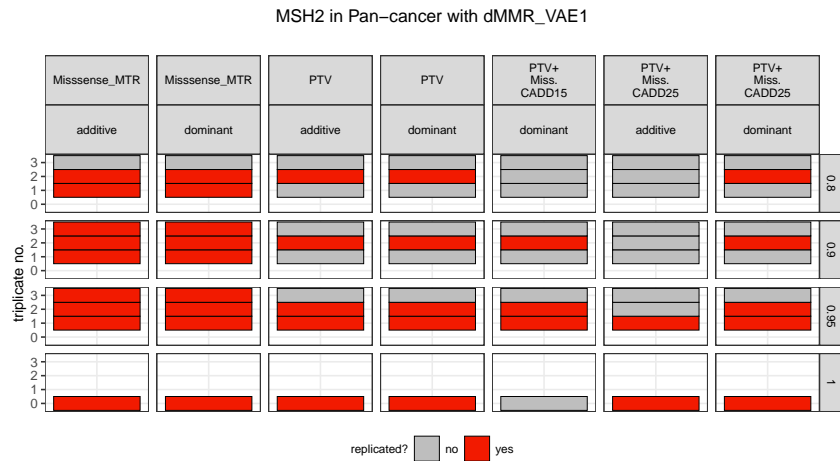

**Supplementary Fig. 11: Number of replicated associations between *MSH2* and dMMR\_VAE1 in pan-cancer in subsampling analysis.** Showing replicated hits (red tile) for each pLoF rare variant set and model of inheritance combination (columns) for each subsampling (rows). Data of the validation cohort was randomly subsampled retaining 95, 90, and 80 % of the data three times for each subsampling (triplicate number on y-axis). Bottom row showing associations without any subsampling (100 % of the data).

## 2.5 Overview of Discovered Hits and/or Replicated Hits

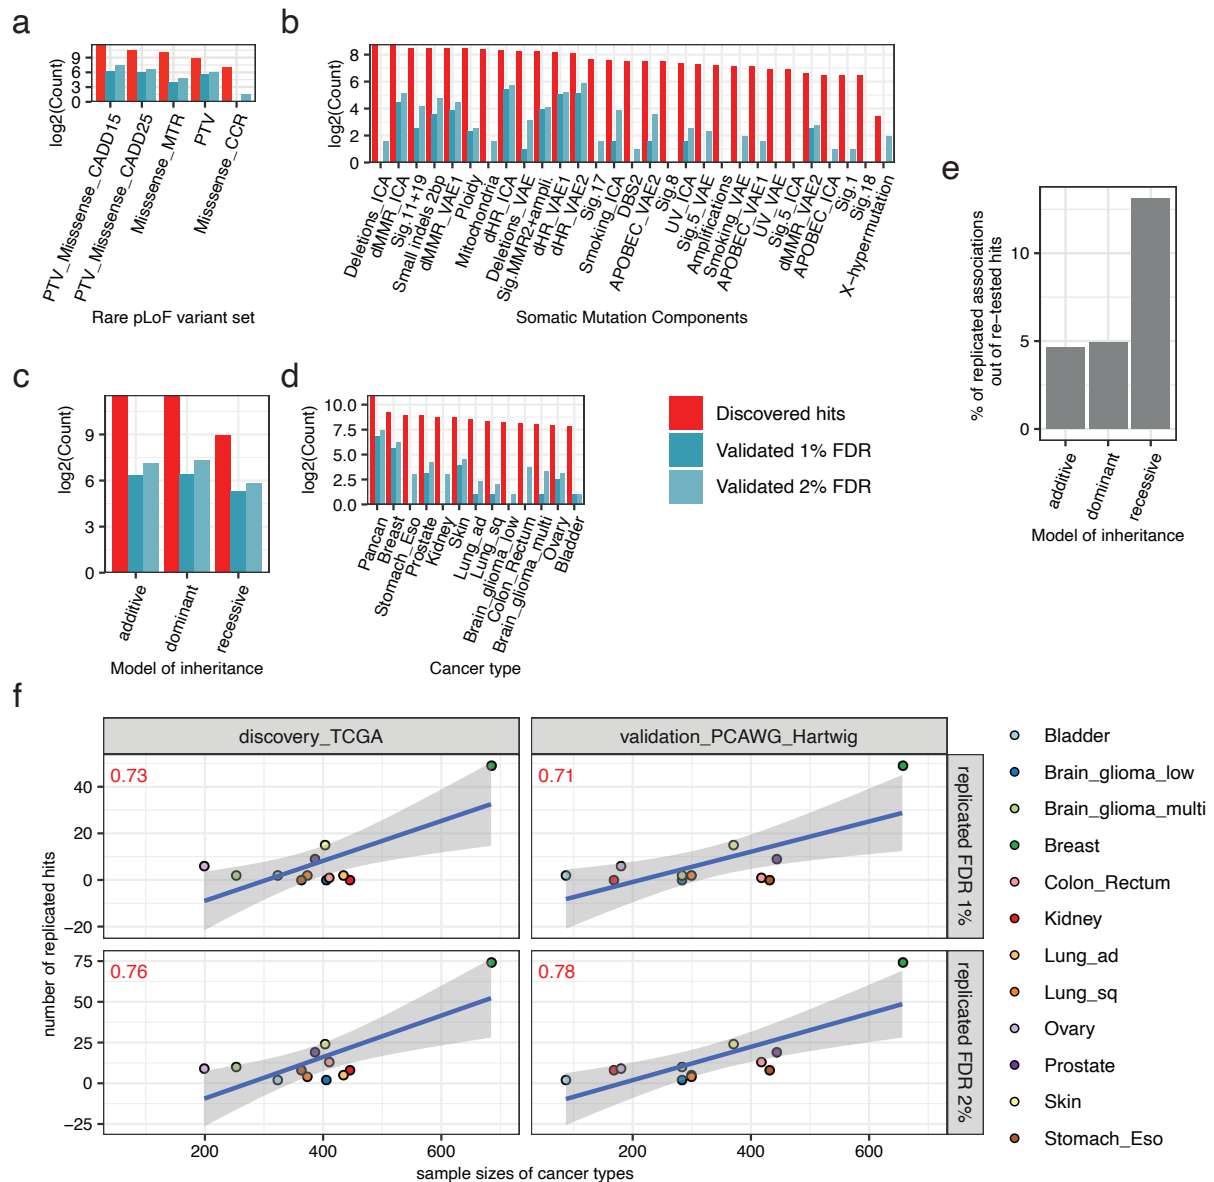

**Supplementary Fig. 12: Overview of number of discovered and validated hits.** **a**, Number of discovered hits, number of replicated hits at a FDR of 1% and number replicated hits at a FDR of 2% across rare pLoF variant sets, **b**, somatic components, **c**, models of inheritance, and **d**, cancer types. Log2 counts shown on the y-axis for panels a-d. **e**, Amount of replicated hits out the re-tested discovered hits at a FDR of 1% across different models of inheritance. **f**, Number of replicated hits (y-axis) versus sample sizes of the corresponding cancer types in which they replicated (x-axis). Columns represent the two cohorts, and rows the applied FDR. Color code for the different cancer types. Pearson correlation shown on the top left corner in red and linear regression fitted through each plot (blue line). Shaded band illustrating 95% confidence interval. Pancan analysis was excluded.

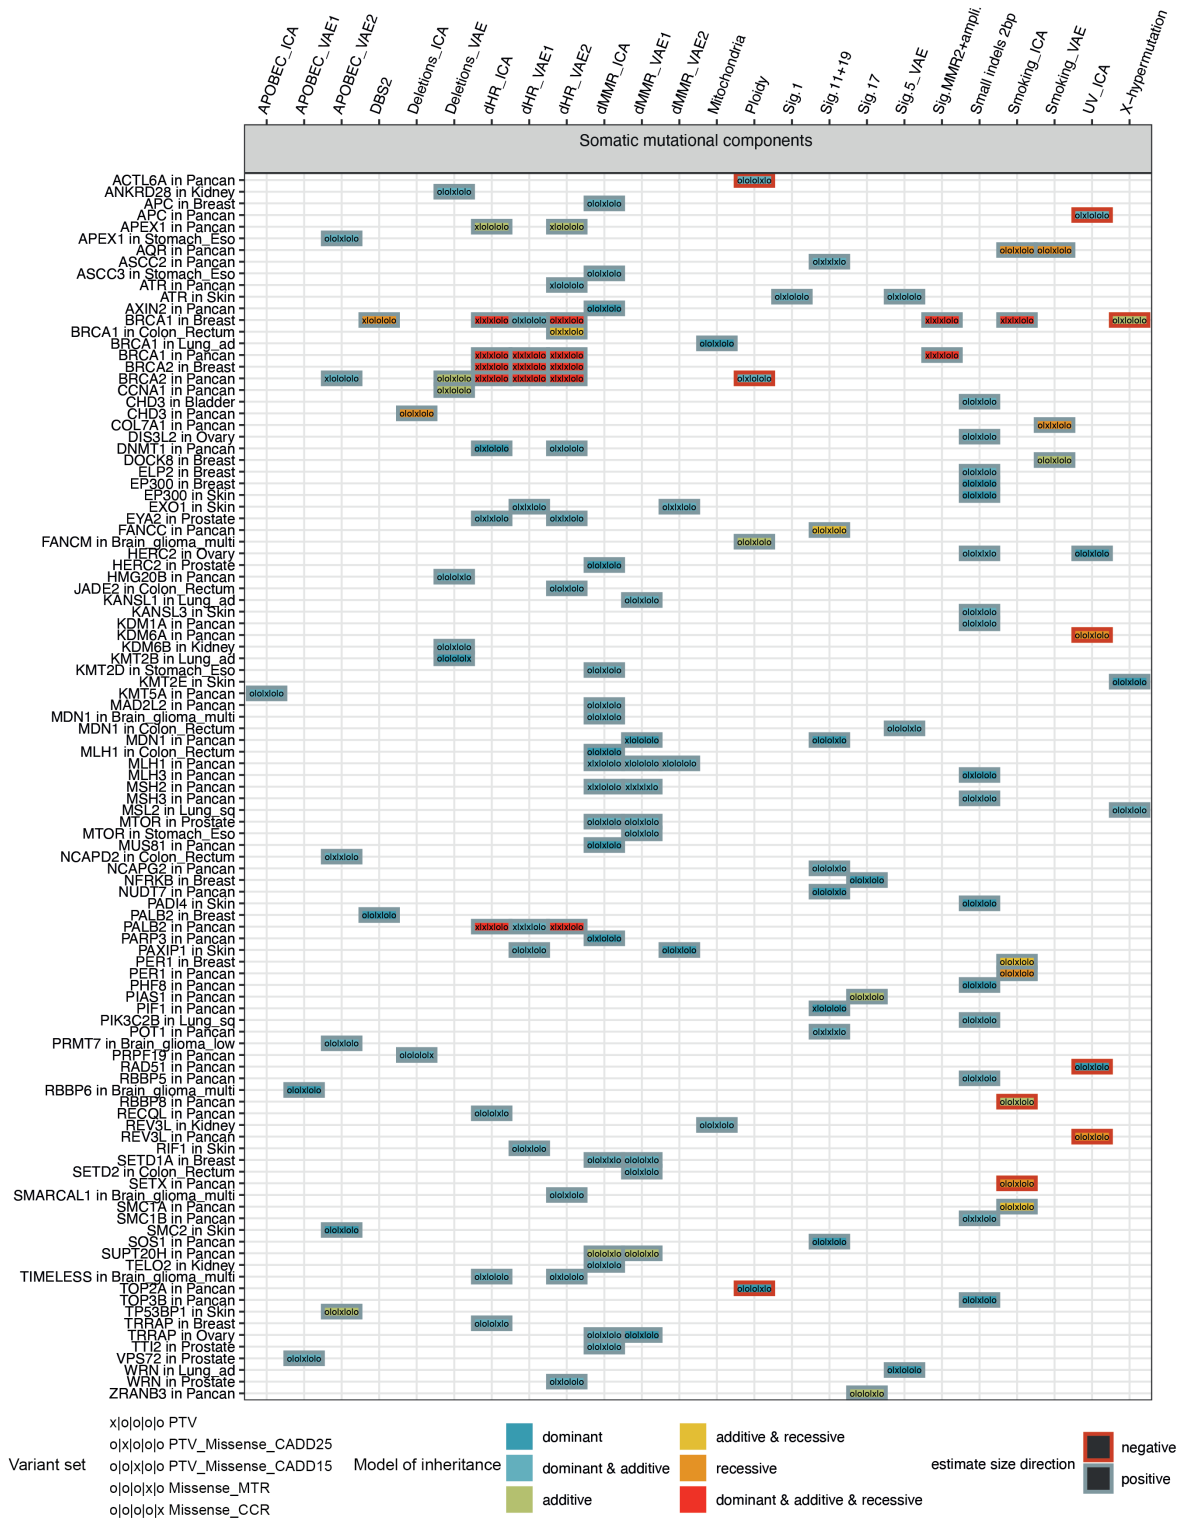

**Supplementary Fig. 13: Validated hits at a FDR of 2 %.** Showing replicated hits (y-axis) and the phenotype(s) they associated with (x-axis). Color code in tiles showing with which model(s) of inheritance hit associated with and symbols showing with which variant set(s) hit associated with.

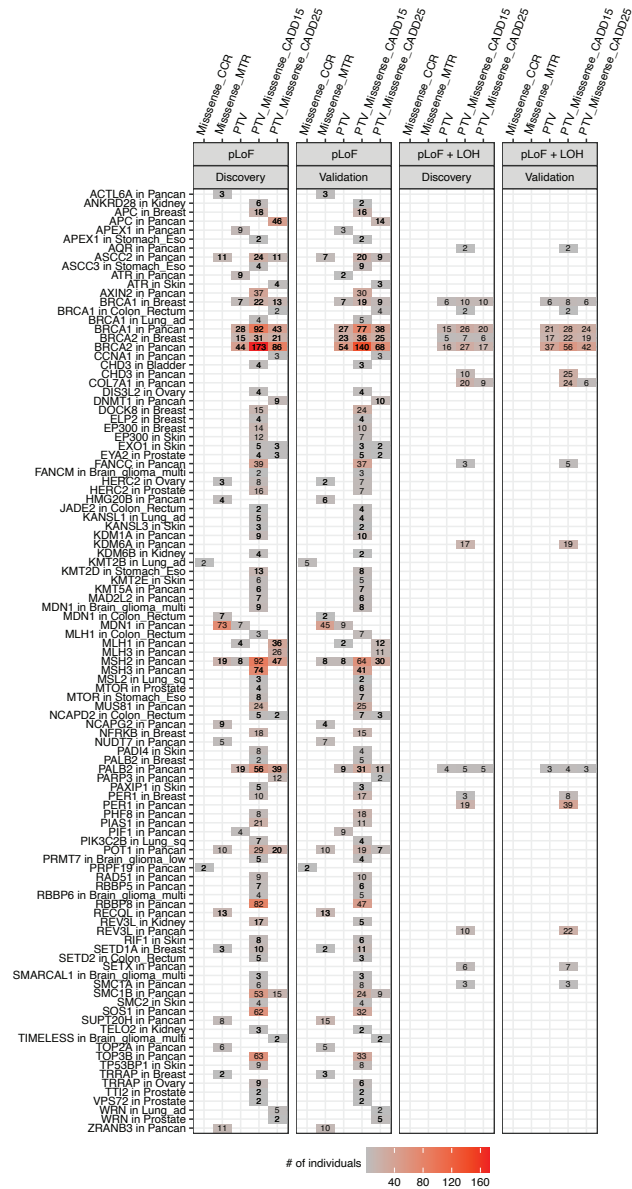

**Supplementary Fig. 14: Number of individuals with rare pLOF variants (and somatic LOH) in genes replicating at a FDR of 2%.** Showing replicated hits (y-axis) and the number of individuals in the discovery (1st and 3rd column) and validation cohort (2nd and 4th column) in which these genes had rare pLOF variants (1st and 2nd column) and rare pLOF variants + somatic LOH (3rd and 4th column) for each rare pLOF variant set (x-axis). Number of individuals written in each tile for each combination for which gene associated with.

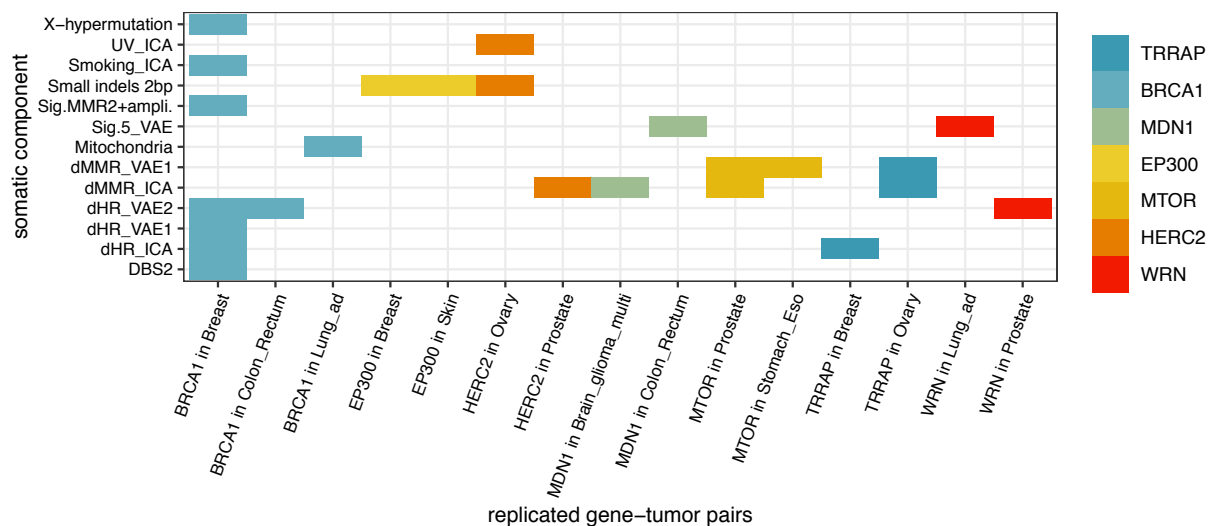

**Supplementary Fig. 15: Seven genes associated with a somatic component in  $\geq 1$  cancer type.** Showing gene-cancer type pairs (x-axis) and the corresponding somatic component they associated with at a FDR of 2% (y-axis). Color code for each gene. Results from pancan analysis excluded.

## 2.6 Distributions of Rare Variants

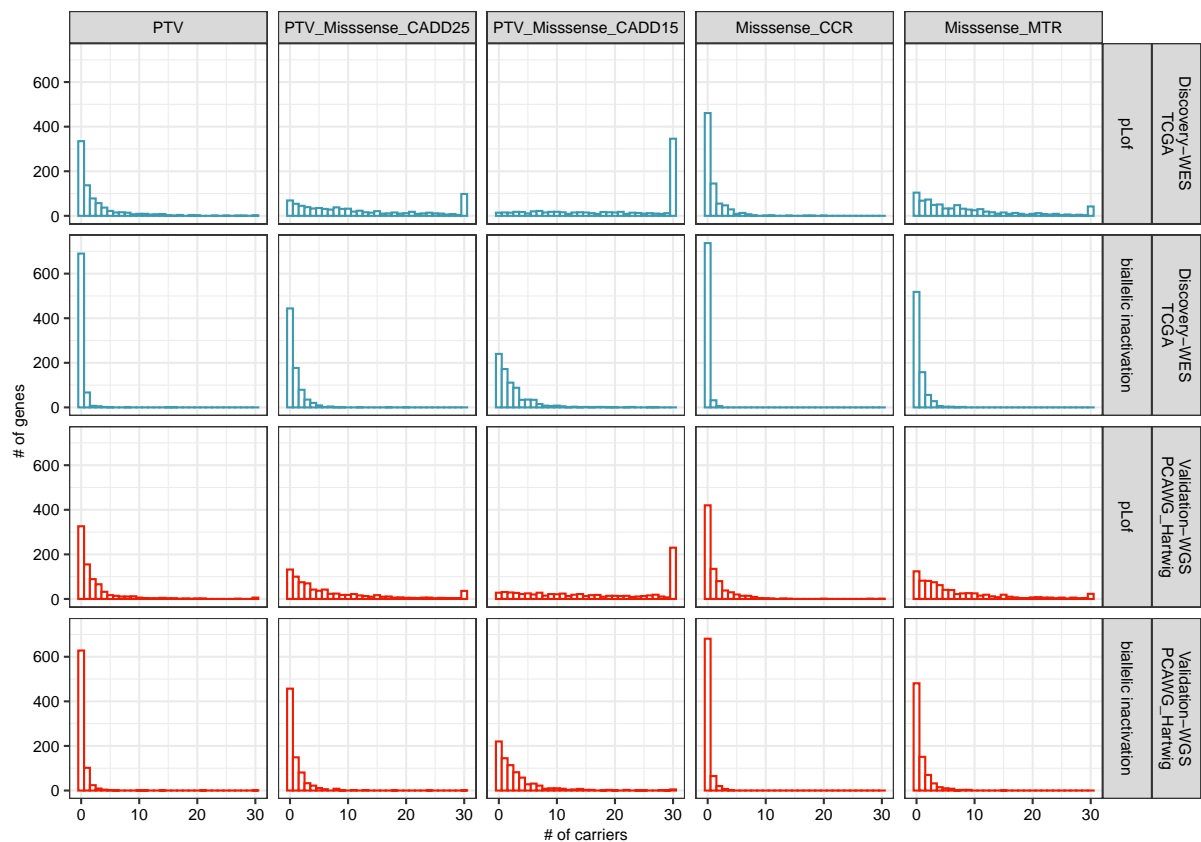

**Supplementary Fig. 16: Overall occurrence of pLOF variants and pLOF variants + somatic LOH in the cohorts.** Showing in how many individuals (x-axis) how many genes (y-axis) were identified with pLOF variants (1st and 3rd row) and pLOF variants + somatic LOH (2nd and 3rd row). Distributions are shown separately for the discovery (1st and 2nd row) and validation (3rd and 4th row) cohort and distributions are shown for each definition of pLOF (columns). Values were capped at 30 for this visualisation. pLOF variants of somatic LOH in the same gene were considered as biallelic inactivations.



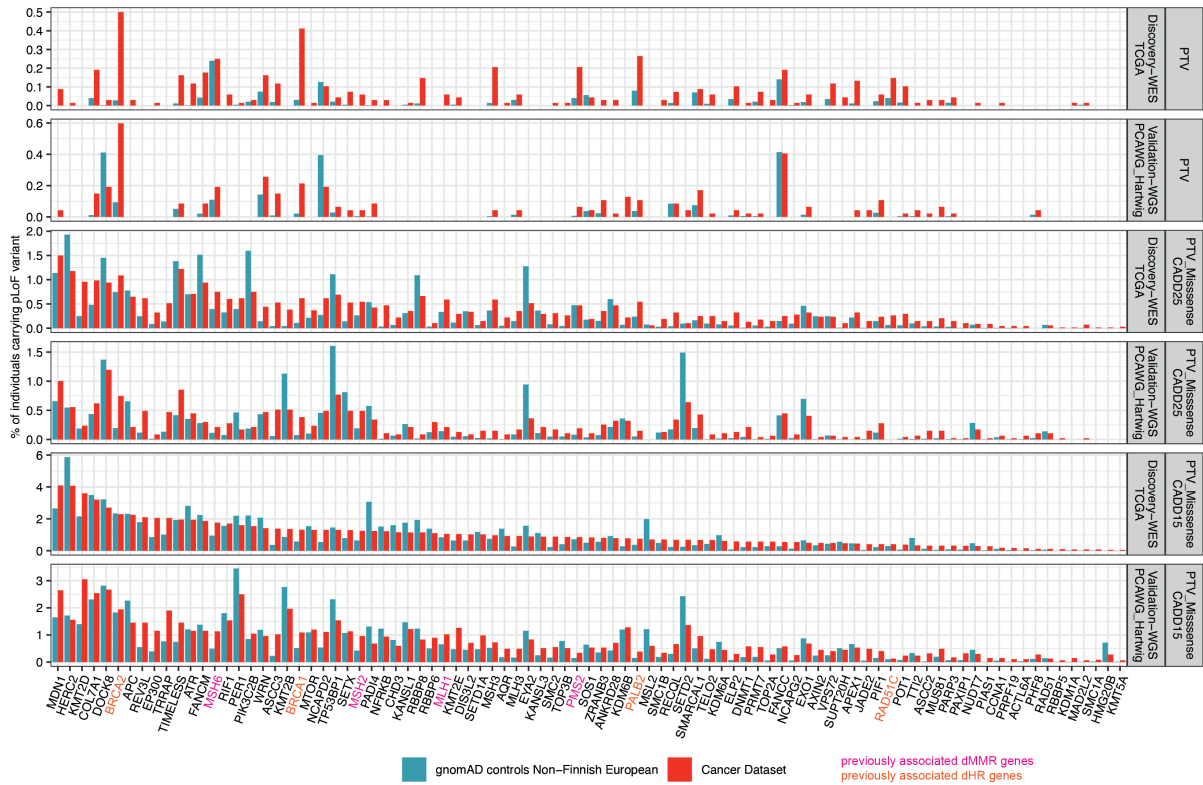

**Supplementary Fig. 18: Frequency of pLOF variants in analyzed cancer dataset vs. control samples in gnomAD v2.1<sup>12</sup>.** Showing frequency of rare pLOF variants (y-axis) based on three different definitions and for the discovery and validation cohort separately (rows) as red bars for all 86 genes which replicated at a FDR of 2% in addition to *PMS2*, *MSH6*, and *RAD51C*. In comparison, showing frequency of the same variants identified in the cancer datasets (red bar) in all gnomAD control samples with Non-Finnish European ancestry (blue bar). Control samples in gnomAD comprise samples which did not have a common disease and/or were included as control samples in studies. For this analysis, in the cancer datasets only rare pLOF variants were included which were also identified in gnomAD v2.1.

## 2.7 Network Analysis

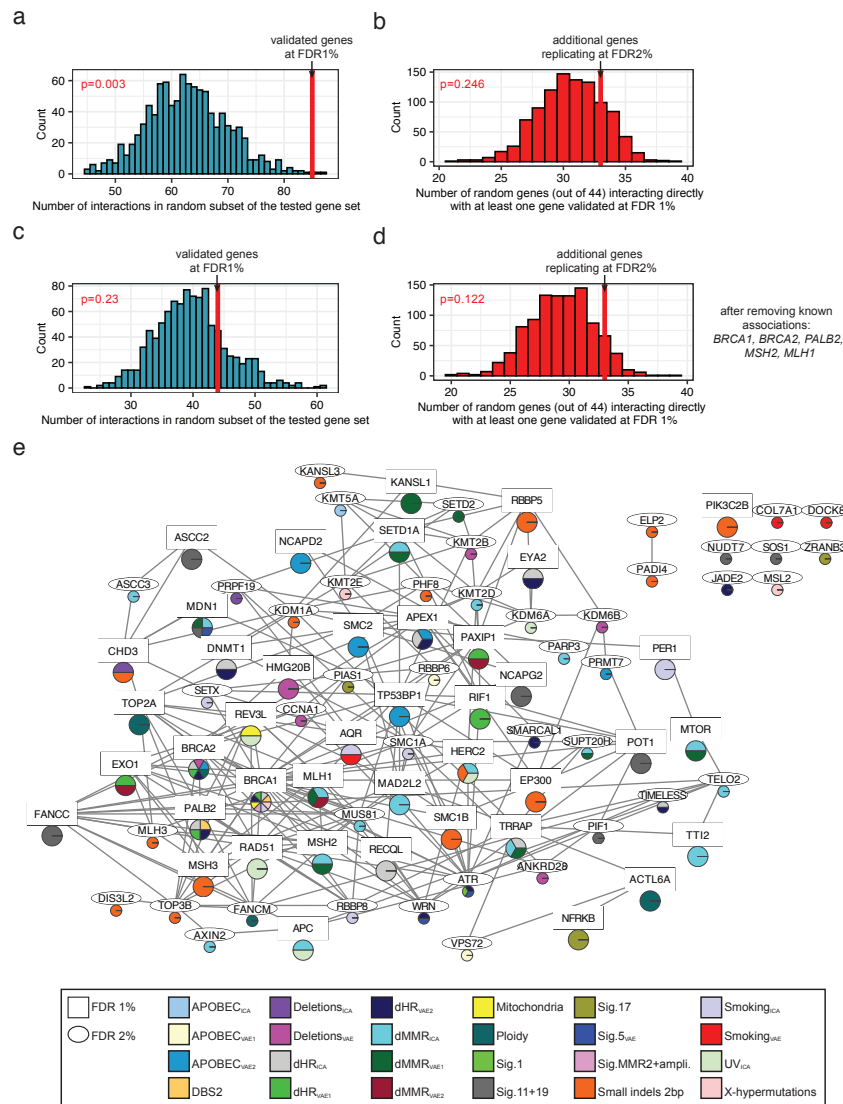

**Supplementary Fig. 19: Network analysis (HumanNet) supports the role of rare germline variation in somatic mutational processes.** All panels in this figure were generated using the functional gene network from HumanNet. In panels a-d p-values were calculated via randomization using a one-sided test. **a**, Number of physical interactions in a random subset of the tested gene set (controlled for interaction node degree) (x-axis) (blue bars). Red line shows the number of interactions within genes which replicated at a FDR of 1%. **b**, Number of randomly selected genes from the tested gene set interacting with at least one gene, which replicated at a FDR of 1% (x-axis) (red bars), (controlled for interaction node degree). Randomization performed 1,000 times. Red line shows the number of genes, out of the ones which additionally replicated at a FDR of 2%, interacting with at least one gene replicating at a FDR of 1%. **c**, Same as in a after excluding known genes from the analysis (*BRCA1*, *BRCA2*, *PALB2*, *MSH2*, and *MLH1*). **d**, Same as in b after excluding known genes from the analysis (*BRCA1*, *BRCA2*, *PALB2*, *MSH2*, and *MLH1*). **e**, Visualisation of interactions between proteins for genes replicating at a FDR of 1% (square) and genes replicating at a FDR of 2% (ellipse). Color code in pie chart showing the somatic components the corresponding gene associated with. Line width corresponding to interaction score.

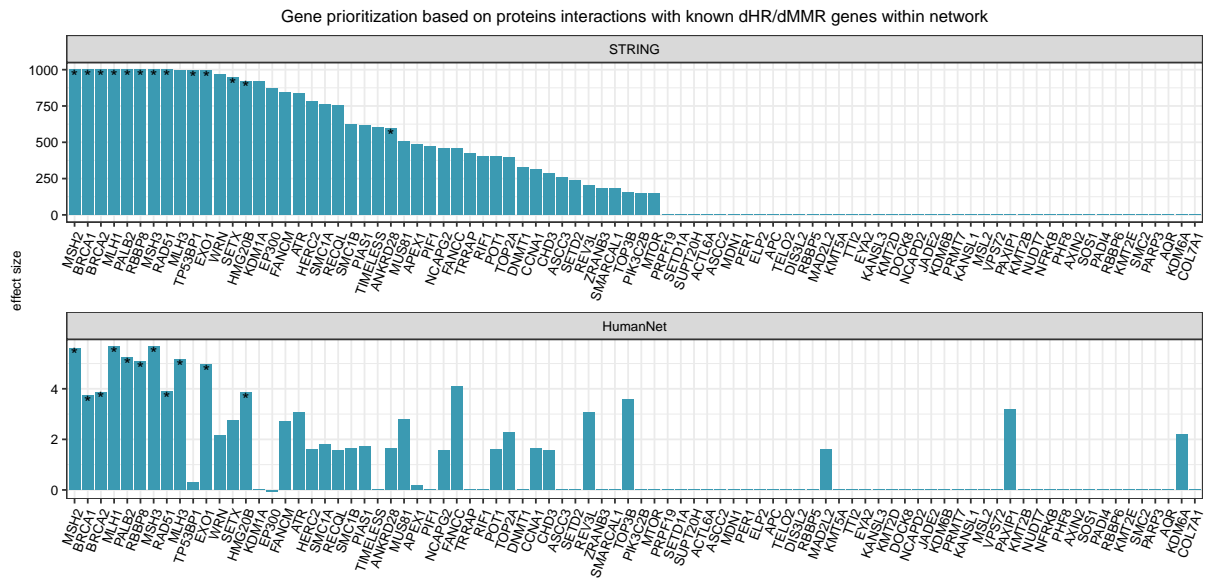

**Supplementary Fig. 20: Gene prioritization based on protein interactions with known dHR/dMMR genes within network.** Within a network it was estimated how strongly a protein interacts with a known dHR (BRCA1, BRCA2, PALB2, RAD51C) or MMR (MLH1, MSH2, MSH6, PMS2) protein in comparison to other proteins with the same node connectivity. Gene prioritization was performed with STRING network (top) and HumanNet (bottom). Genes reaching significance at a FDR of 25 % were marked with an asterisk. Multiple testing correction was performed via Benjamini-Hochberg procedure.

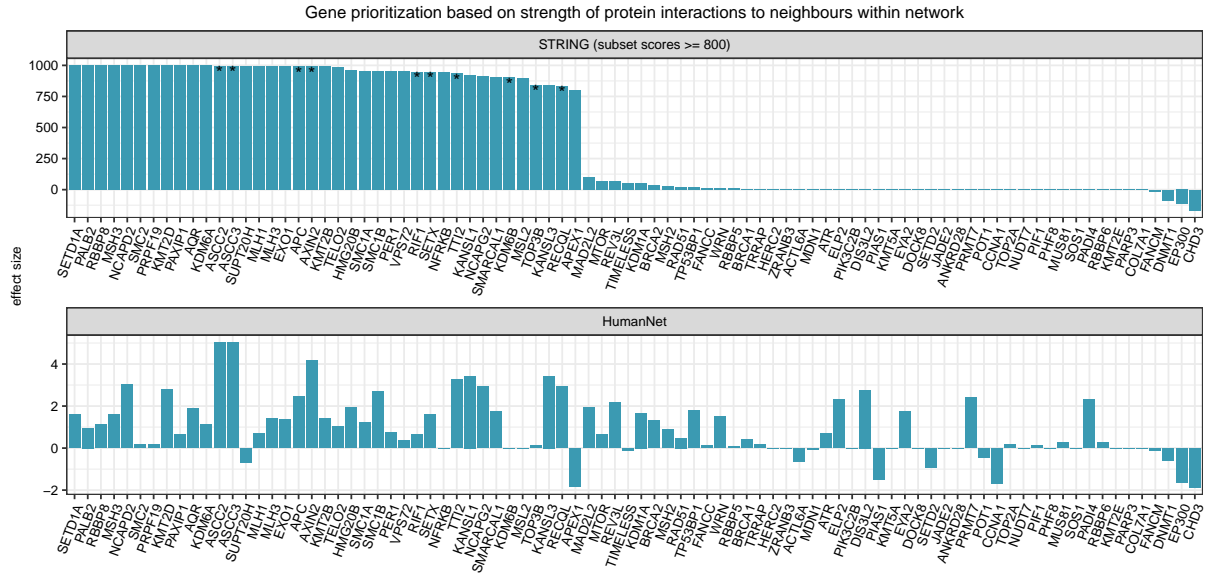

**Supplementary Fig. 21: Gene prioritization based on strength of protein interactions to neighbours within network.** Within a network it was estimated whether a protein had stronger interactions with its neighbours than with its neighbours within a random network with the same node connectivity. Gene prioritization was performed with STRING (subset with interactions having a score  $\geq 800$ ) network (top) and HumanNet (bottom). Genes reaching significance at a FDR of 25 % were marked with an asterisk. Multiple testing correction was performed via Benjamini-Hochberg procedure.

## 2.8 Somatic Input Features

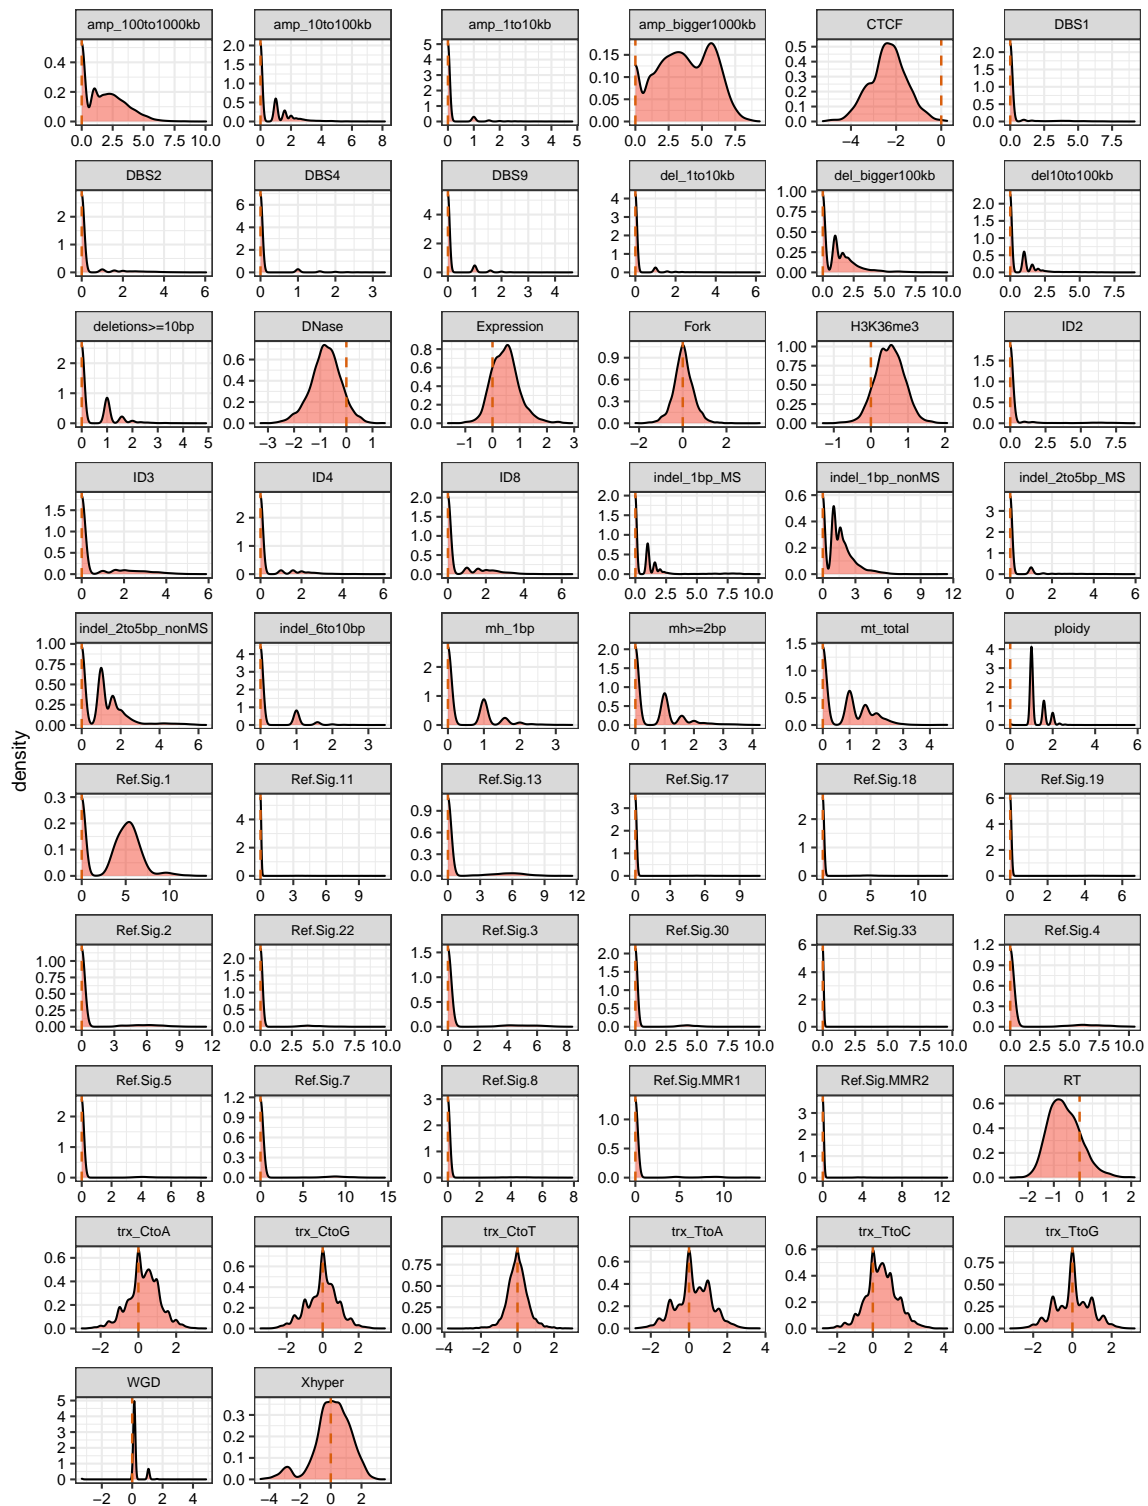

**Supplementary Fig. 22: Distribution of all 56 somatic features in TCGA-WES.** Dashed red line going through 0. Fork: replicative strand bias, RT: replication timing, trx: transcription strand bias, Xhyper: Chromosome X hypermutation.

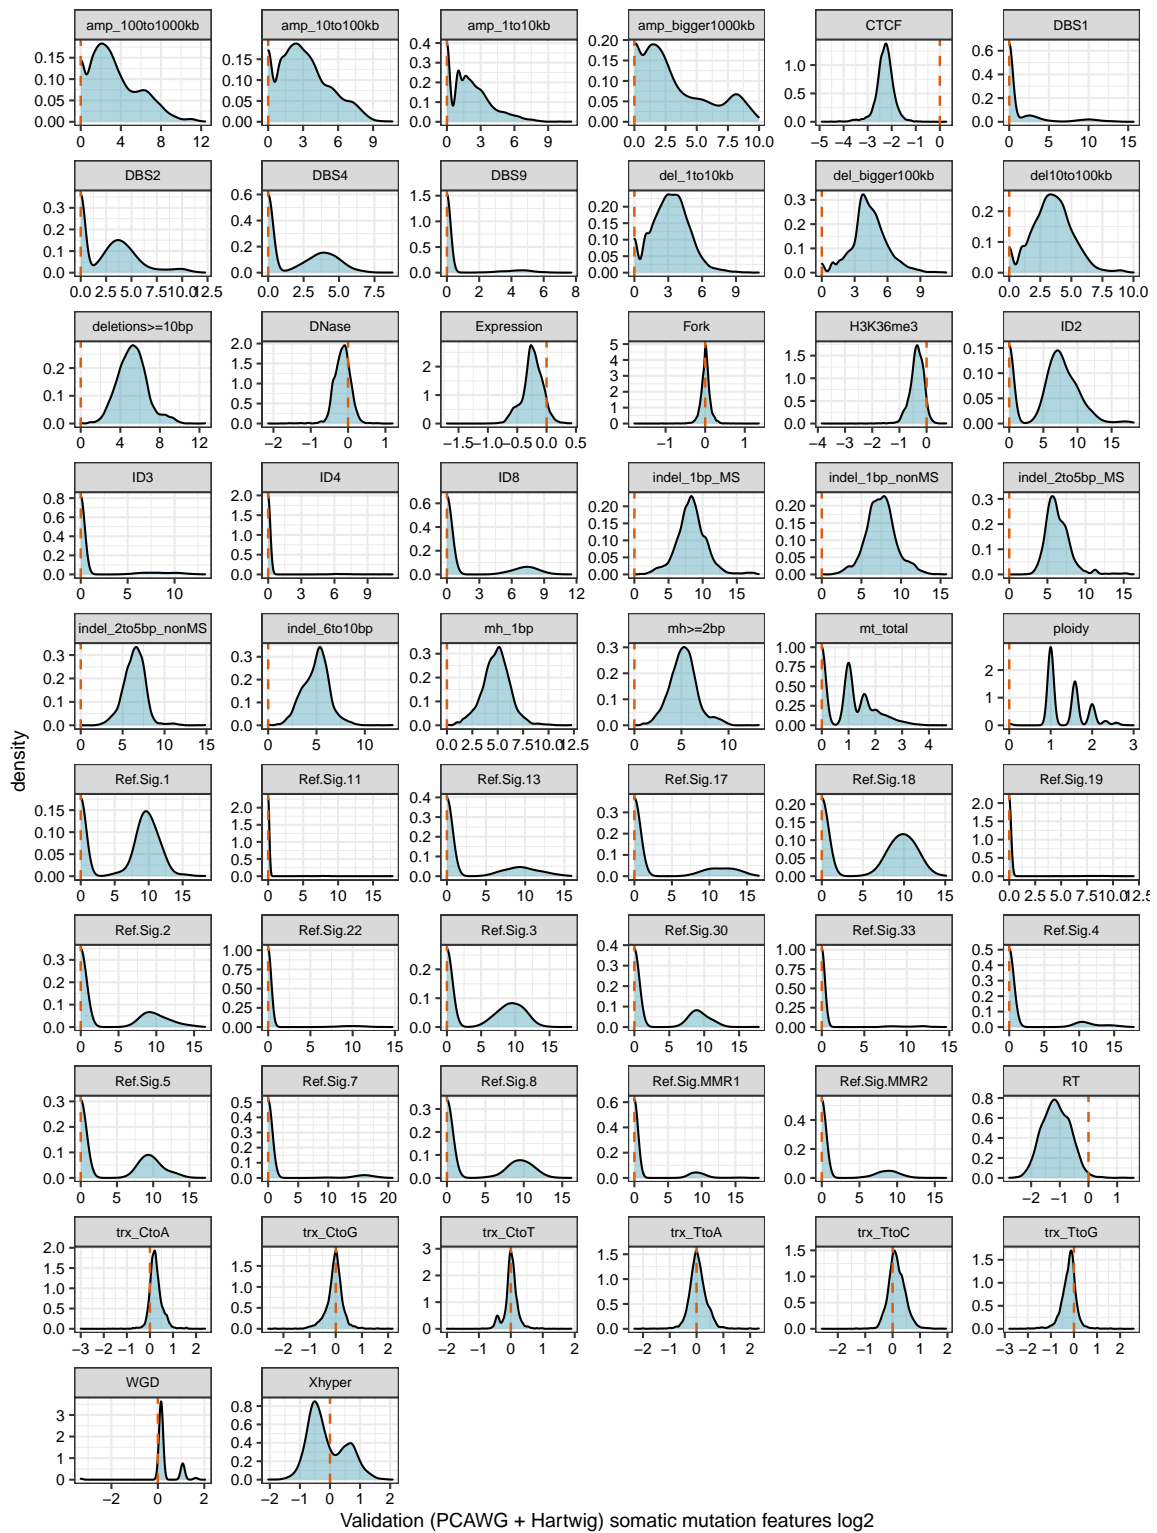

**Supplementary Fig. 23: Distribution of all 56 somatic features in PCAWG\_Hartwig-WGS.** Dashed red line going through 0. Fork: replicative strand bias, RT: replication timing, trx: transcription strand bias, Xhyper: Chromosome X hypermutation.

## 2.9 Extraction of Independent Components

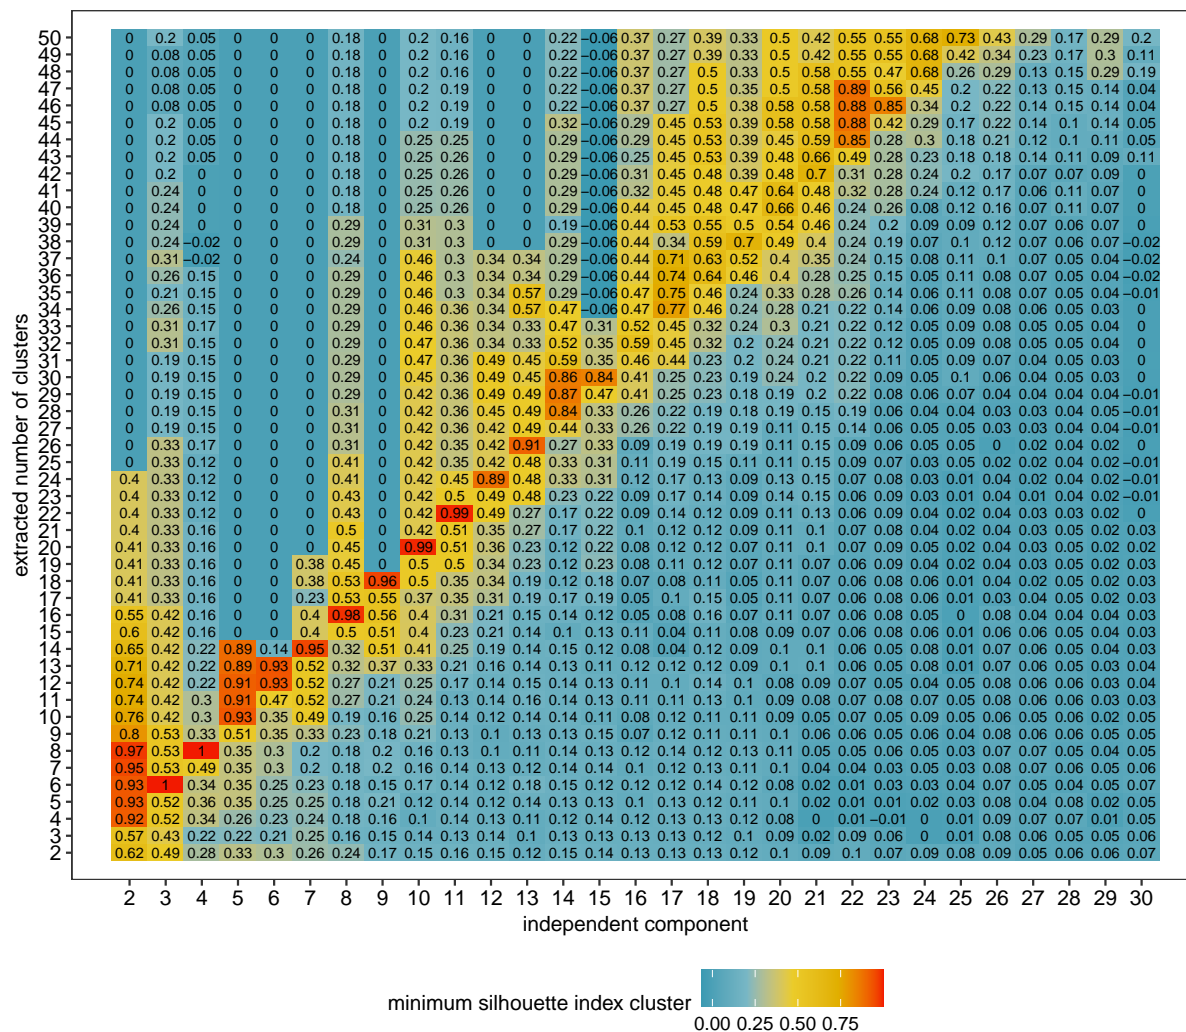

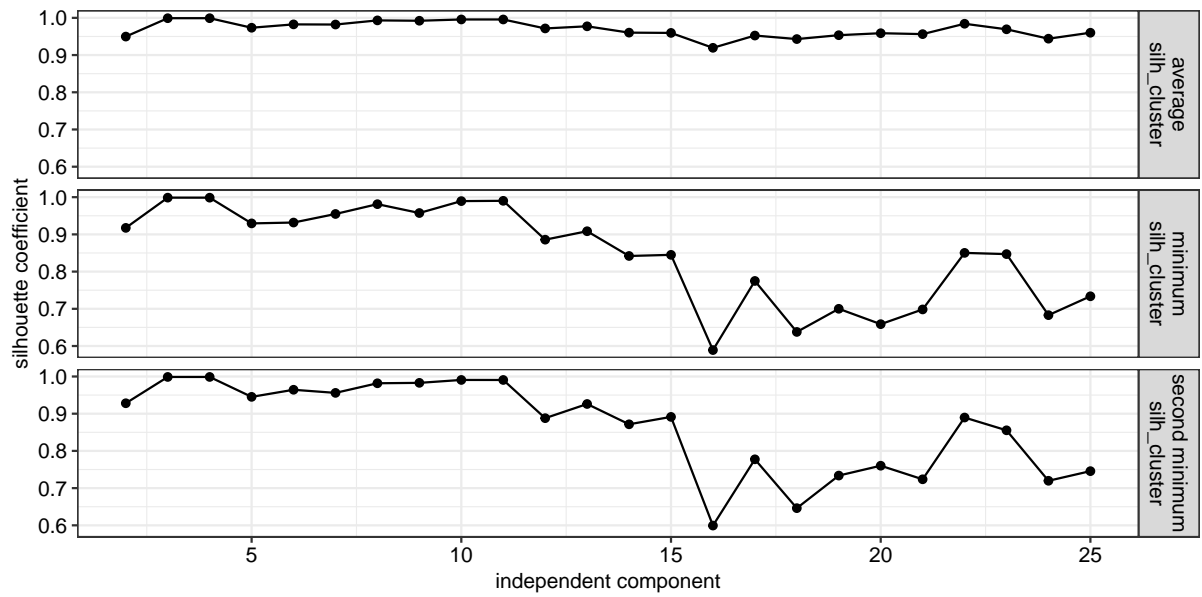

**Supplementary Fig. 25: Selection of 15 independent components for further analysis.** Showing the average, minimum and second minimum silhouette index of the clusters when extracting 2 times more clusters for a set number of components.

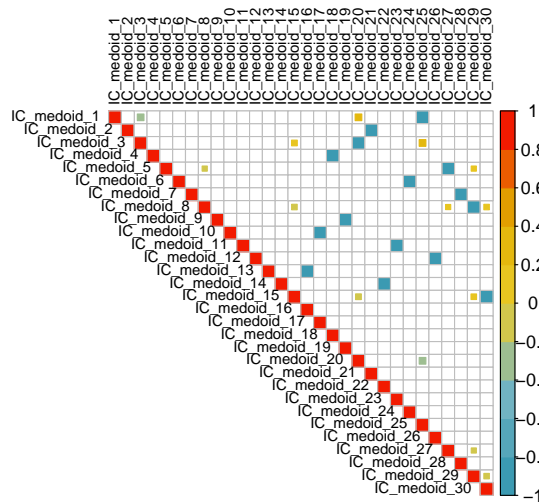

**Supplementary Fig. 26: Pearson correlations between all 30 independent components which were extracted using 15 components and k-medoid clustering with k=30.** Each component occurred twice with opposite signs.

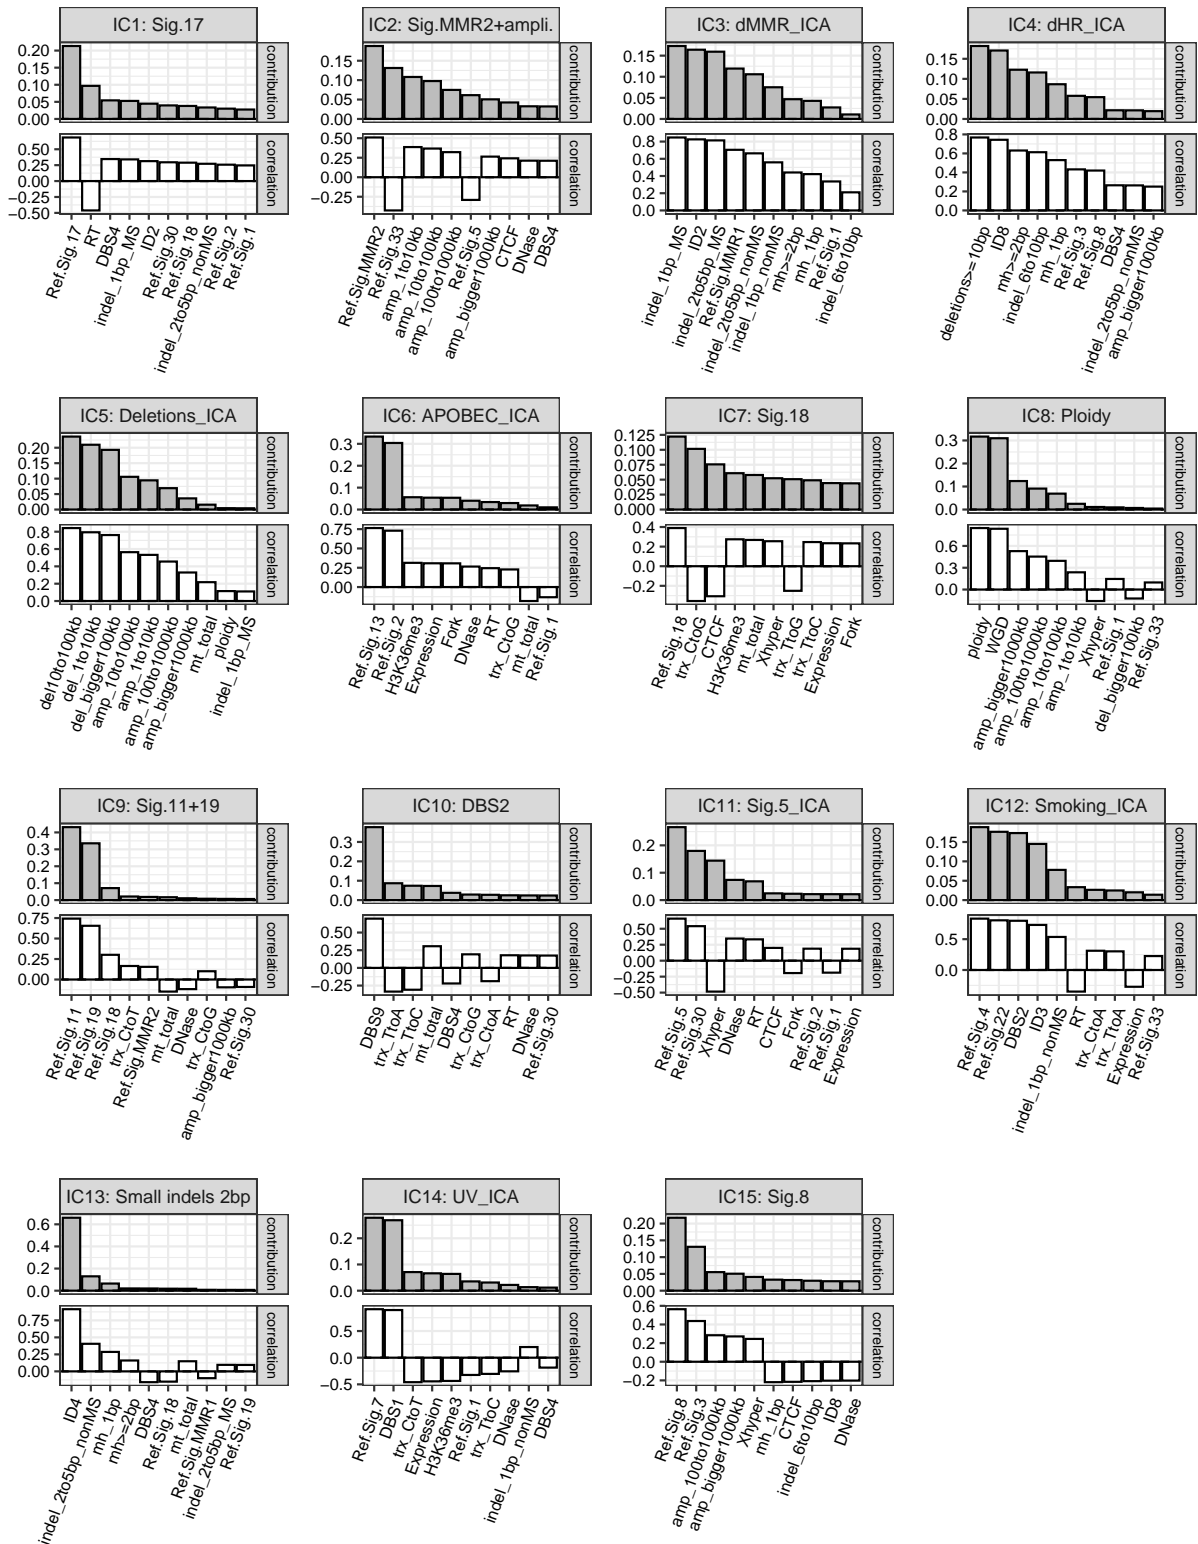

somatic components

**Supplementary Fig. 27: Overview of strongest contributing features to the independent components.** Showing the Pearson correlation (white bars) and contribution (fraction of 1) (grey bars) of the 10 strongest somatic features to the respective components. Fork: replicative strand bias, RT: replication timing, trx: transcription strand bias, Xhyper: Chromosome X hypermutation. Components were renamed based on strongest correlating somatic features.

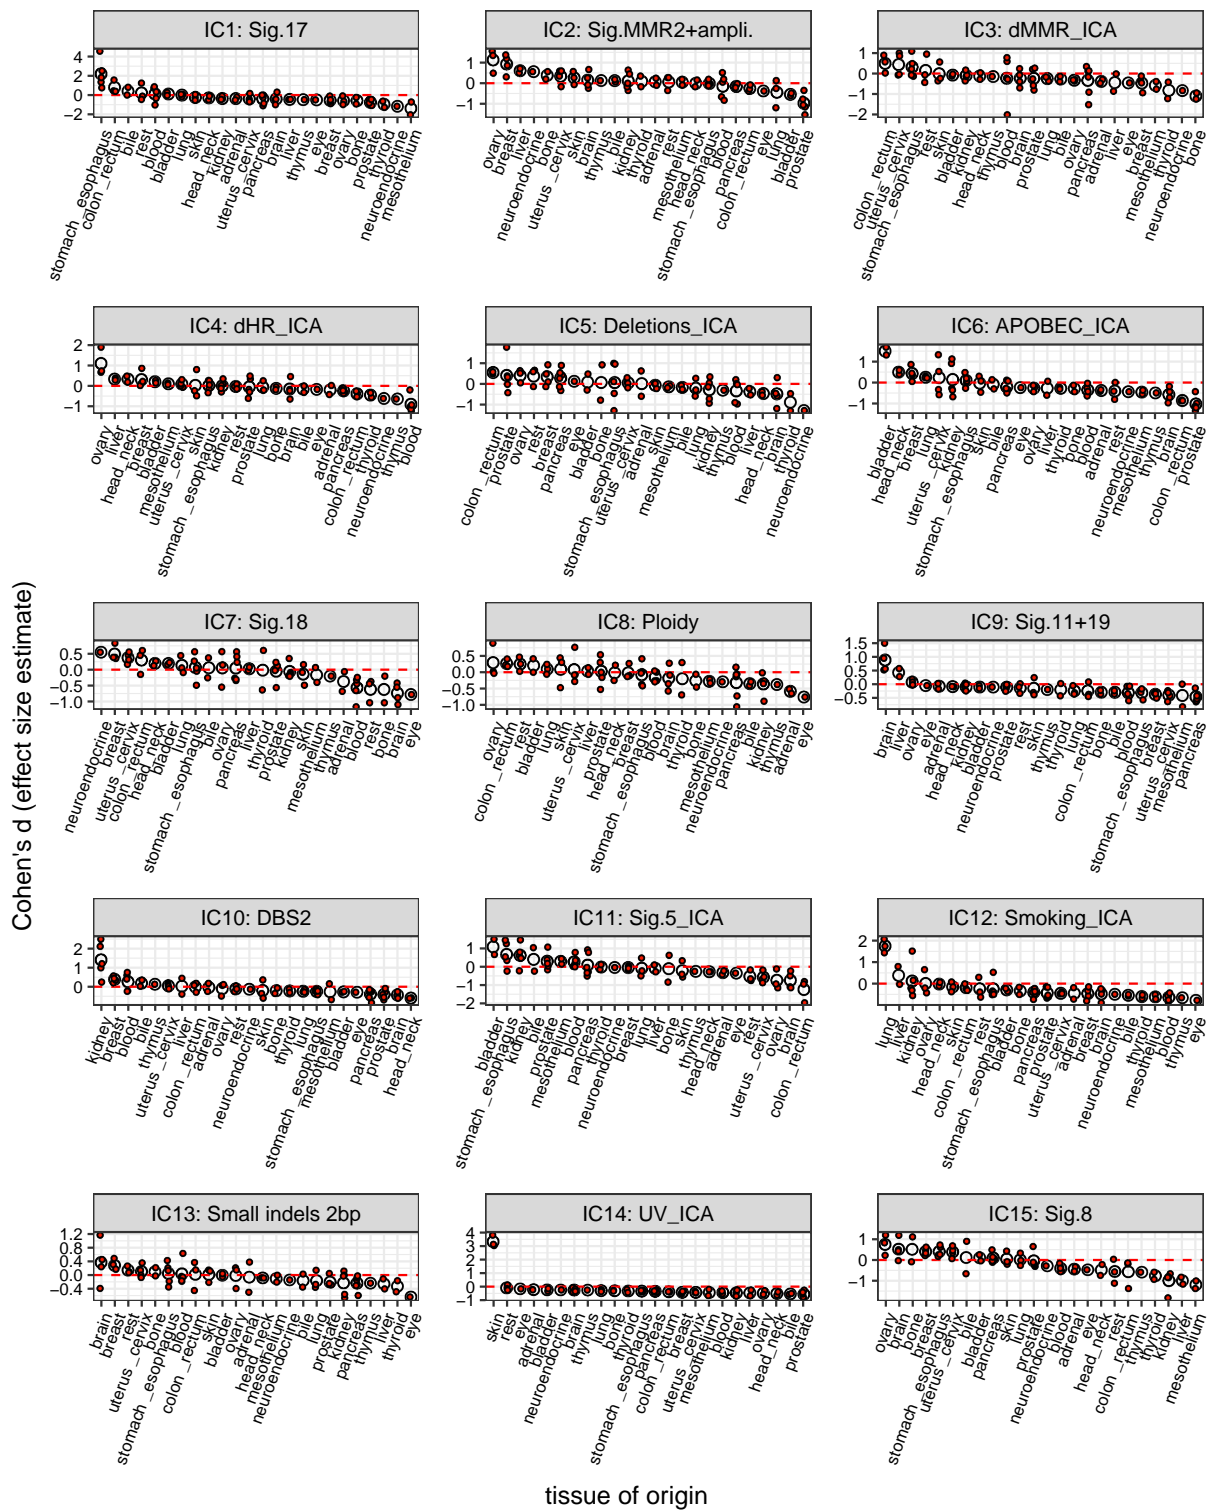

**Supplementary Fig. 28: Several independent component scores were enriched in specific tissue of origins.** Cohen's  $d$  (effect size estimate) was calculated for each cancer type, grouped by tissue of origin and, then the average value was estimated. Average effect size estimates were ordered by decreasing value for each independent component. Components were renamed based on strongest correlating somatic features. Dashed red line going through 0.

## 2.10 Extracting Components using Variational Autoencoders

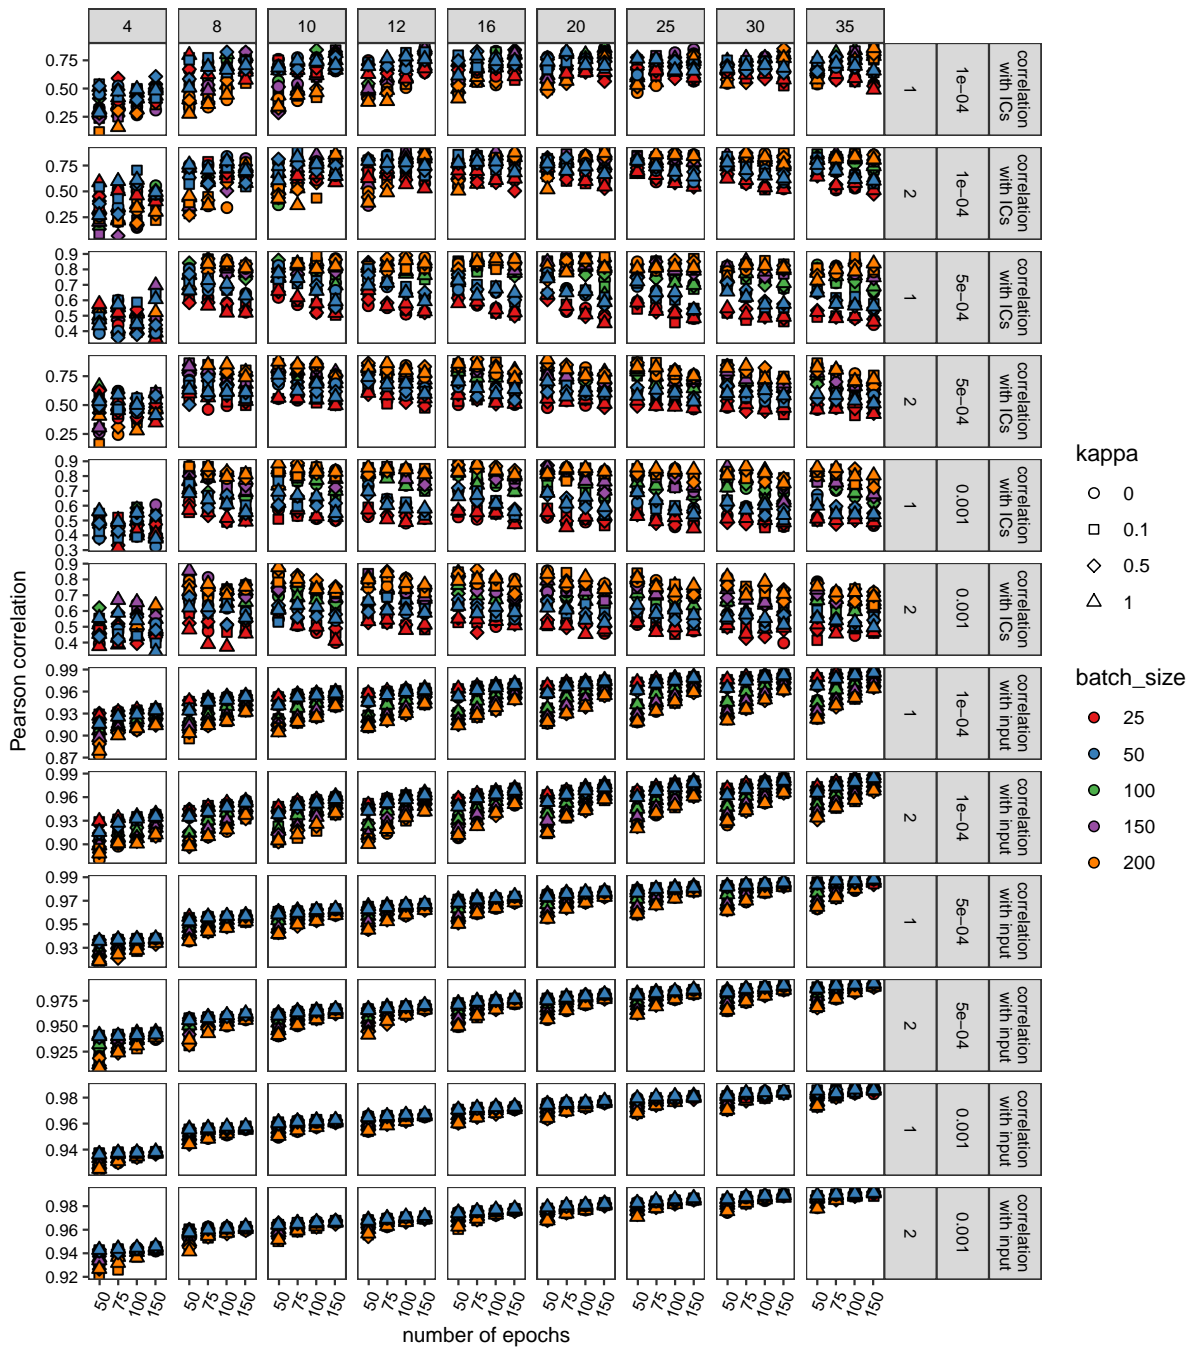

**Supplementary Fig. 29: Finding the optimal hyperparameters for the variational autoencoder.** Increasing number of epochs (x-axis), different kappa factors (point shape), increasing batch sizes (point color), three different learning rates (0.001, 0.0005, and 0.0001), different number of hidden layers between latent space and input/output (either 1 or 2) and different number of components (4, 8, 10, 12, 16, 20, 25, 30, and 35) were tested. Evaluation by measuring the average Pearson correlation with 4 ICs (UV, smoking, dMMR, and dHR ICs) and by calculating the Pearson of the reconstructed input with the initial input (y-axis).

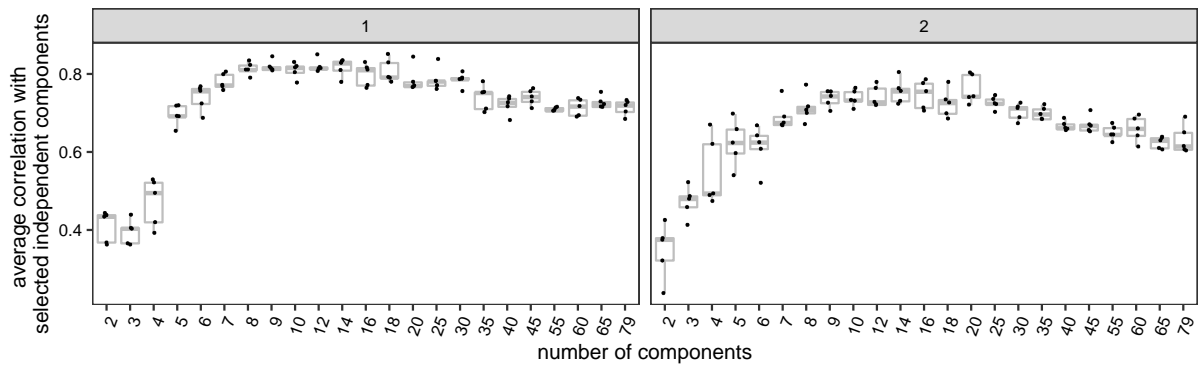

**Supplementary Fig. 30: Correlation with biologically relevant components increased with increasing number of component extractions and quickly reached saturation.** Component extractions were run 5 times for each set component number with different random initiations. Number of components (x-axis) are shown against the average Pearson correlation with 4 biologically relevant IC components (UV, smoking, dMMR, dHR). Facet for either using 1 hidden layer or 2 hidden layers between latent space and input/output. Centre of each boxplot shows median value, bounds of box at 25th and 75th percentiles and minimum and maximum extend to the smallest and largest value, but not more than 1.5 times the interquartile range.

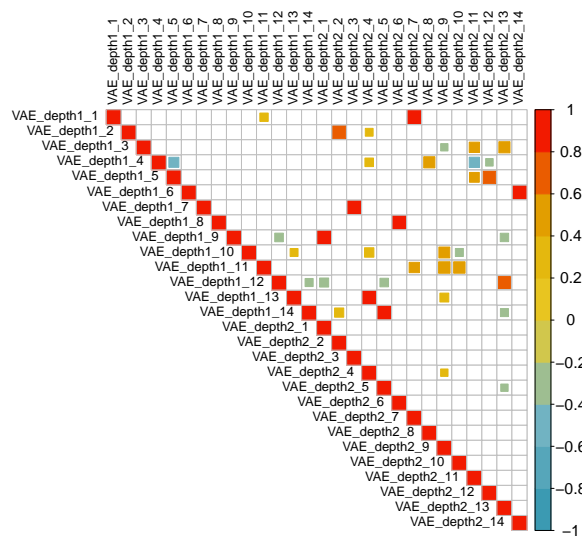

**Supplementary Fig. 31: Number of hidden layers barely made a difference on the extracted components in the latent space of the variational autoencoder.** Pearson correlation between the 14 extracted components with the variational autoencoder using either 1 hidden layer (depth = 1) or 2 hidden layers (depth = 2) between latent space and input/output.

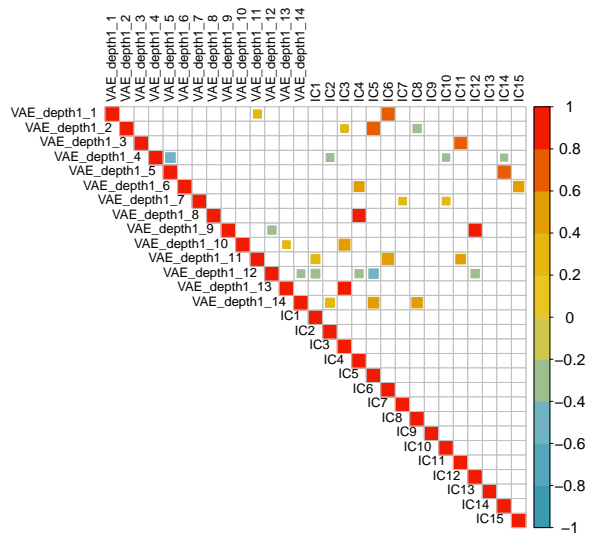

**Supplementary Fig. 32: Some VAE-derived components were not captured in the independent component analysis.** Showing the Pearson correlation between the VAE-derived components using 1 hidden layer (depth = 1) and the ICs.

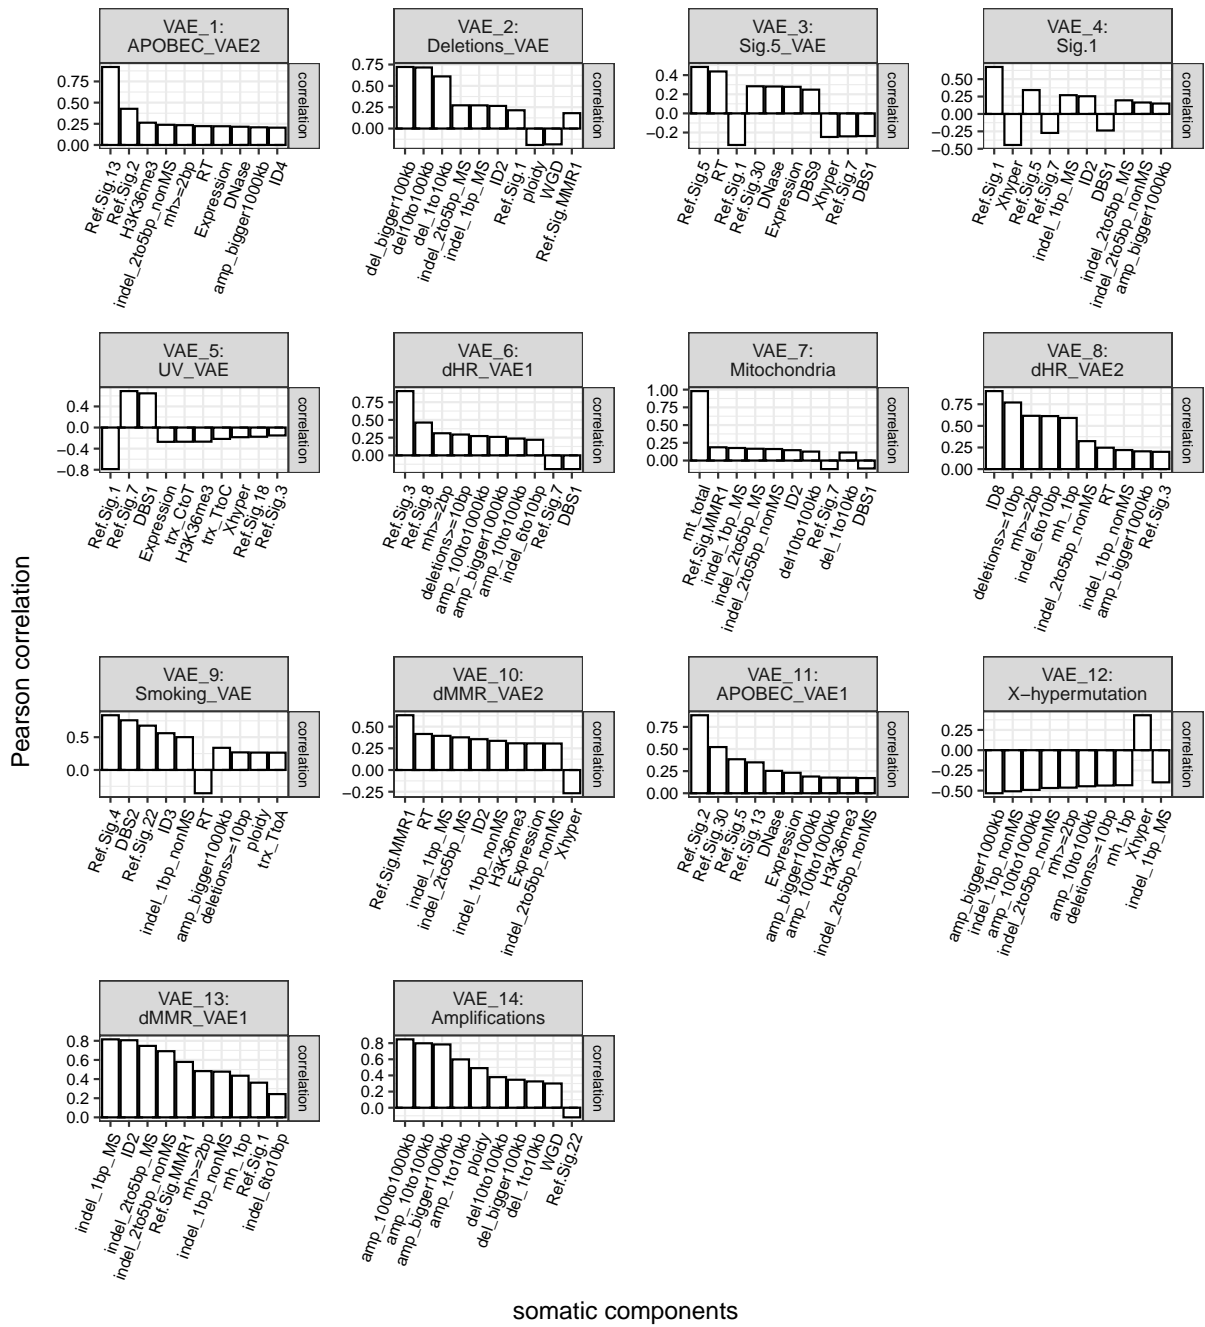

**Supplementary Fig. 33: Overview of strongest contributing features to the variational autoencoder derived components.** Showing the Pearson correlation (white bars) of the 10 strongest somatic features to the respective components, which were extracted via 1 hidden layer between latent space and input/output. Fork: replicative strand bias, RT: replication timing, trx: transcription strand bias, Xhyper: Chromosome X hypermutation. Components were renamed based on strongest correlating somatic features.

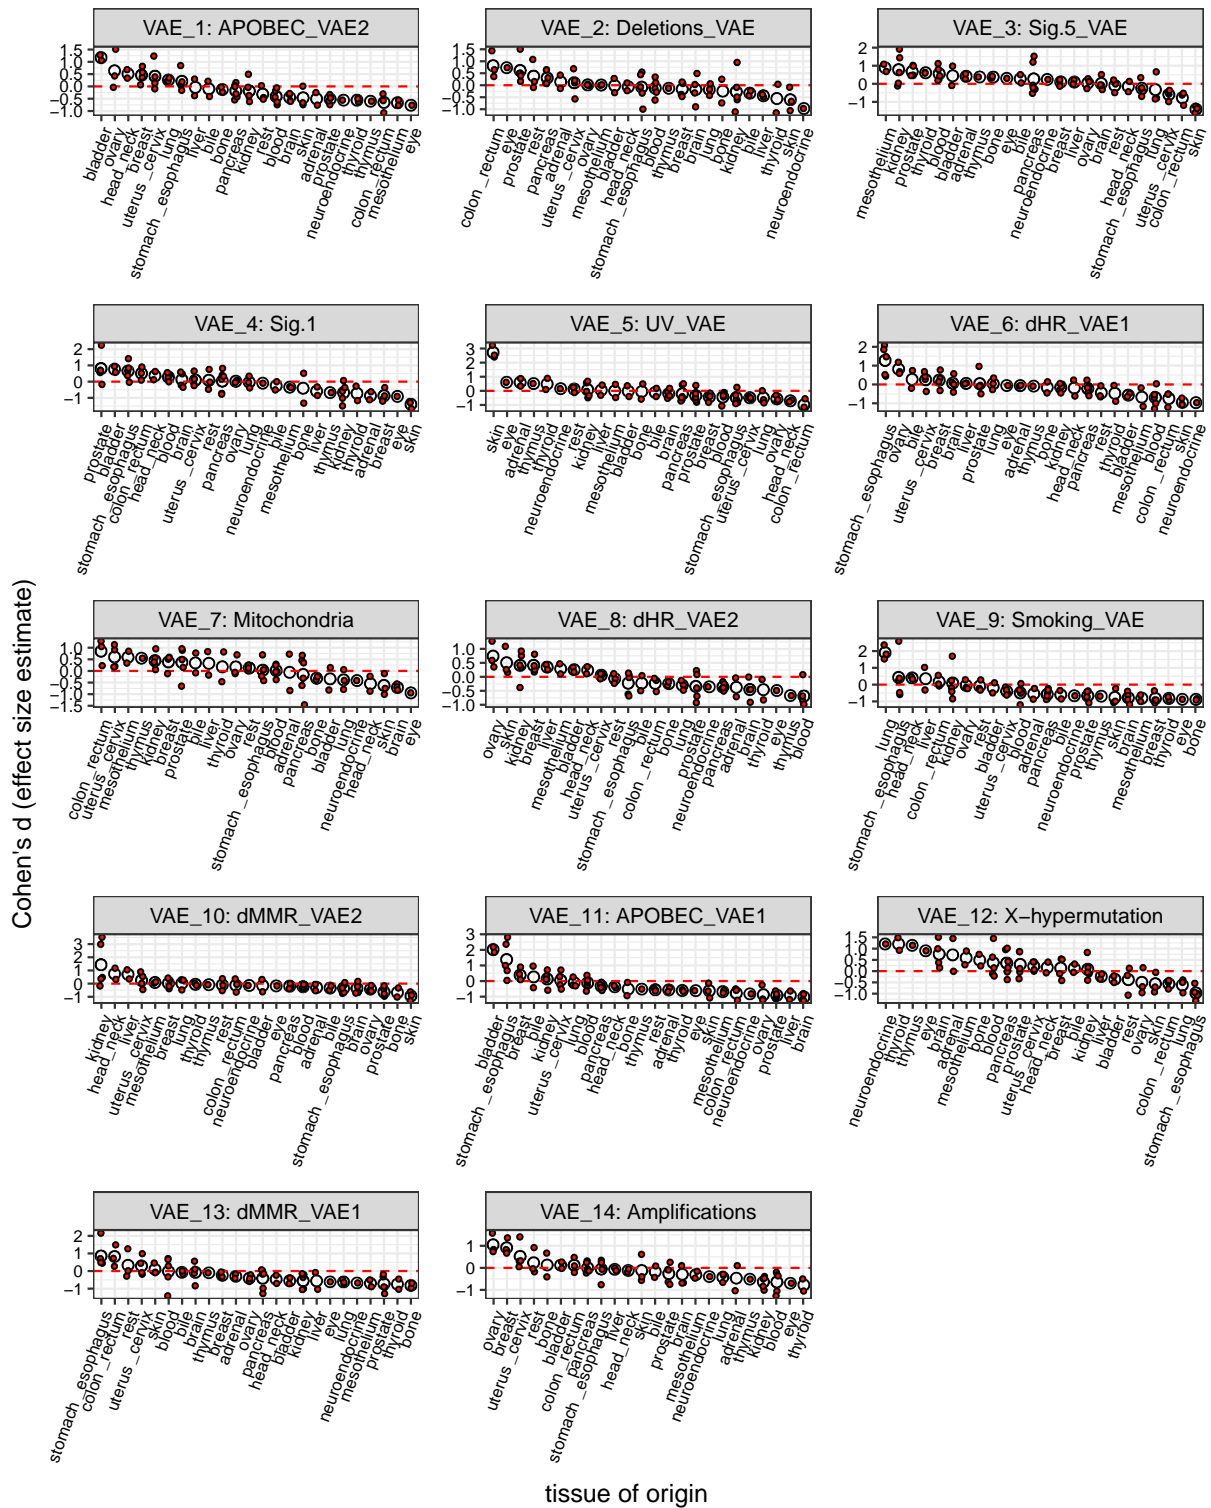

**Supplementary Fig. 34: Several VAE-derived component scores were enriched in specific tissue of origins.** Cohen's  $d$  (effect size estimate) was calculated for each cancer type, grouped by tissue of origin and, then the average value was estimated. Average effect size estimates were ordered by decreasing value for each VAE-derived component. Components were renamed based on strongest correlating somatic features. Dashed red line going through 0.

## 2.11 Overview of 29 Extracted Components

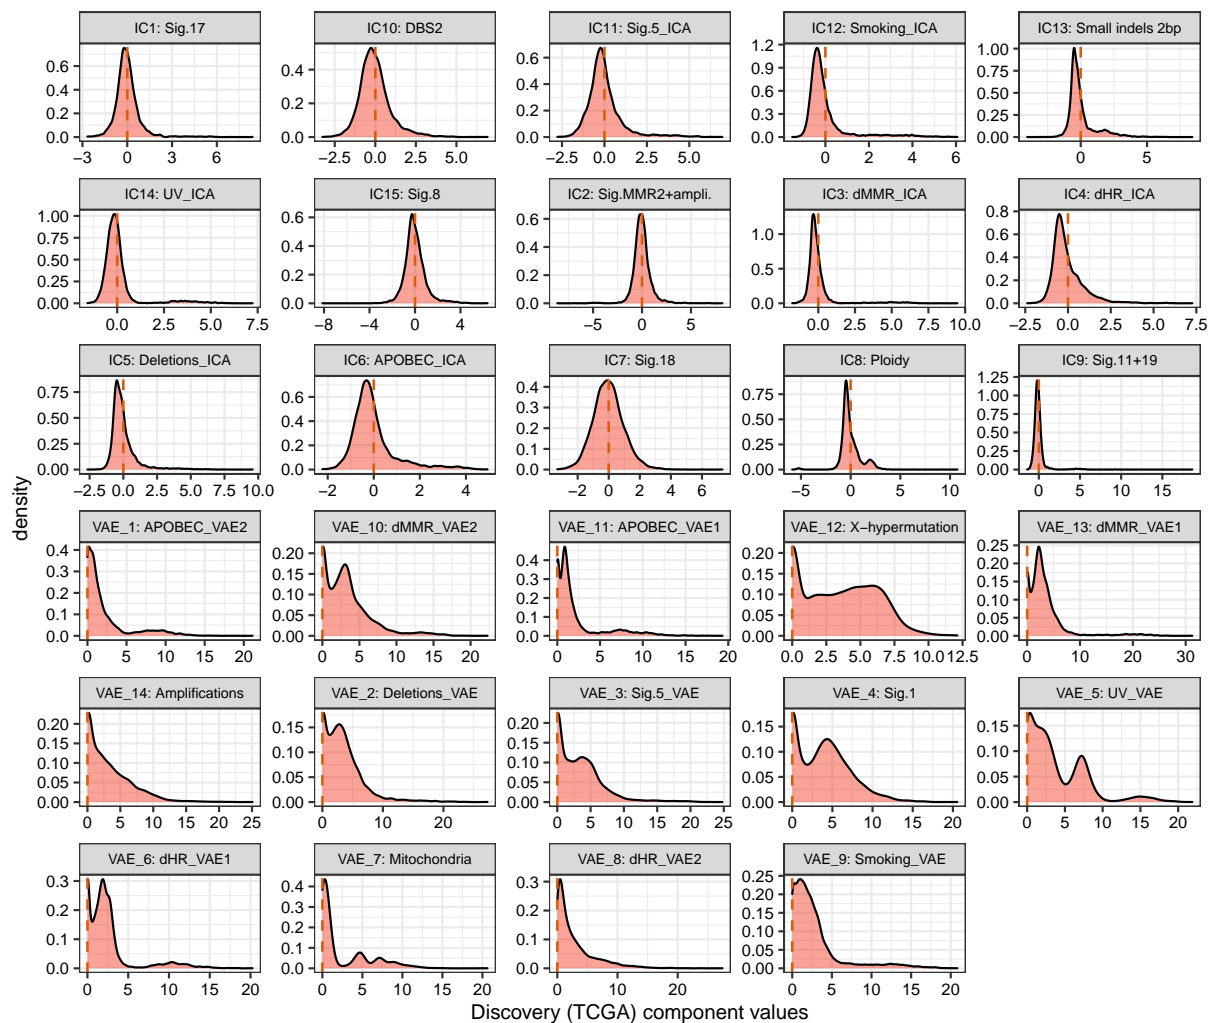

**Supplementary Fig. 35: Distribution of all 29 somatic components in TCGA-WES.** Showing distribution of values of all extracted ICA and VAE components in the discovery cohort TCGA-WES. Components were renamed based on strongest correlating somatic features. Dashed red line going through 0.

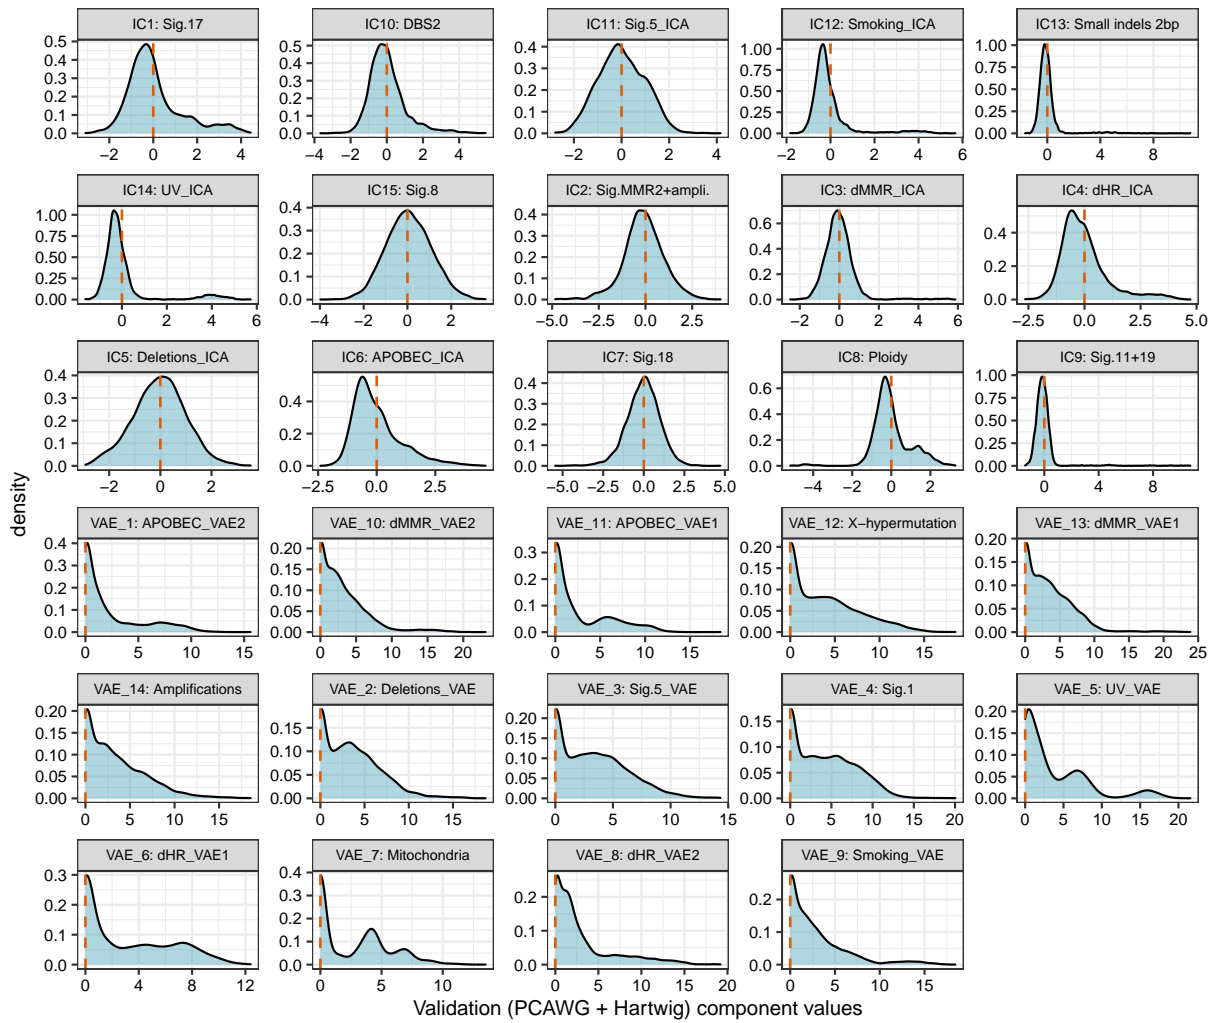

**Supplementary Fig. 36: Distribution of all 29 somatic components in PCAWG\_Hartwig-WGS.** Showing distribution of values of all extracted ICA and VAE components in the validation cohort PCAWG\_Hartwig-WGS. Components were renamed based on strongest correlating somatic features. Dashed red line going through 0.

## 2.12 Correlation between IC9 (Sig.11+19) and telomere features

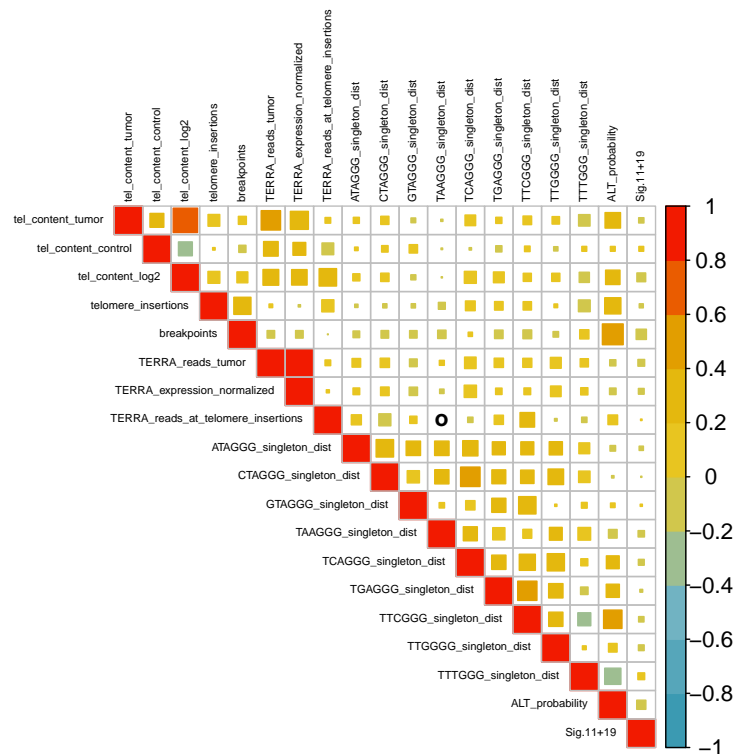

**Supplementary Fig. 37: Pearson correlation between IC9 (Sig.11+19) and telomere features.** Correlations estimated based on 1,254 samples from PCAWG. Telomere features were downloaded from ref<sup>7</sup>.

## 2.13 Sample Level Quality Control and Extraction of Individuals of European Ancestry from Common Germline Variants

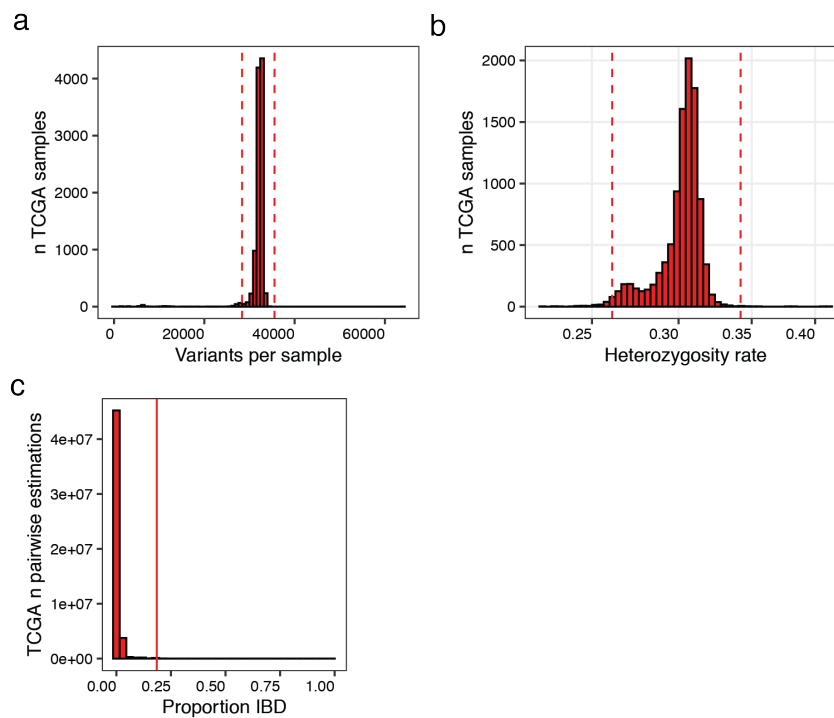

**Supplementary Fig. 38: Identification of individuals with outlying total number of variants, outlying heterozygosity rate or high relatedness in TCGA-WES.** **a**, Distribution of total number of variants across samples. Red dashed lines at 1.5 standard deviations away from the mean. **b**, Distribution of heterozygosity rate across samples. Red dashed lines at 3 standard deviations away from the mean. **c**, Proportion of identity-by-descent (IBD) across all sample pairs. Solid red line at 0.185.

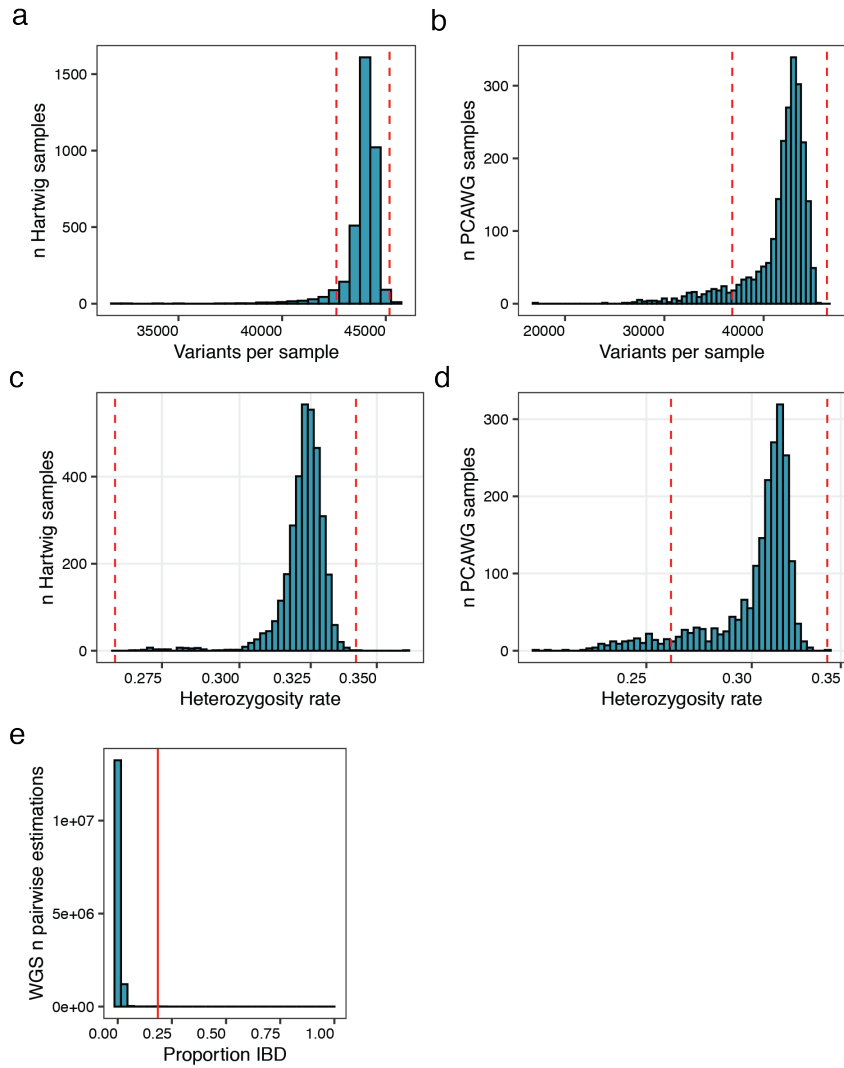

**Supplementary Fig. 39: Identification of individuals with outlying total number of variants, outlying heterozygosity rate or high relatedness in PCAWG\_Hartwig-WGS.** Distribution of total number of variants across samples in **a**, Hartwig and **b**, PCAWG. Red dashed lines at 1.5 standard deviations away from the mean. Distribution of heterozygosity rate across samples in **c**, Hartwig and **d**, PCAWG. Red dashed lines at 3 standard deviations away from the mean. **e**, Proportion of identity-by-descent (IBD) across all sample pairs (PCAWG and Hartwig merged). Solid red line at 0.185.

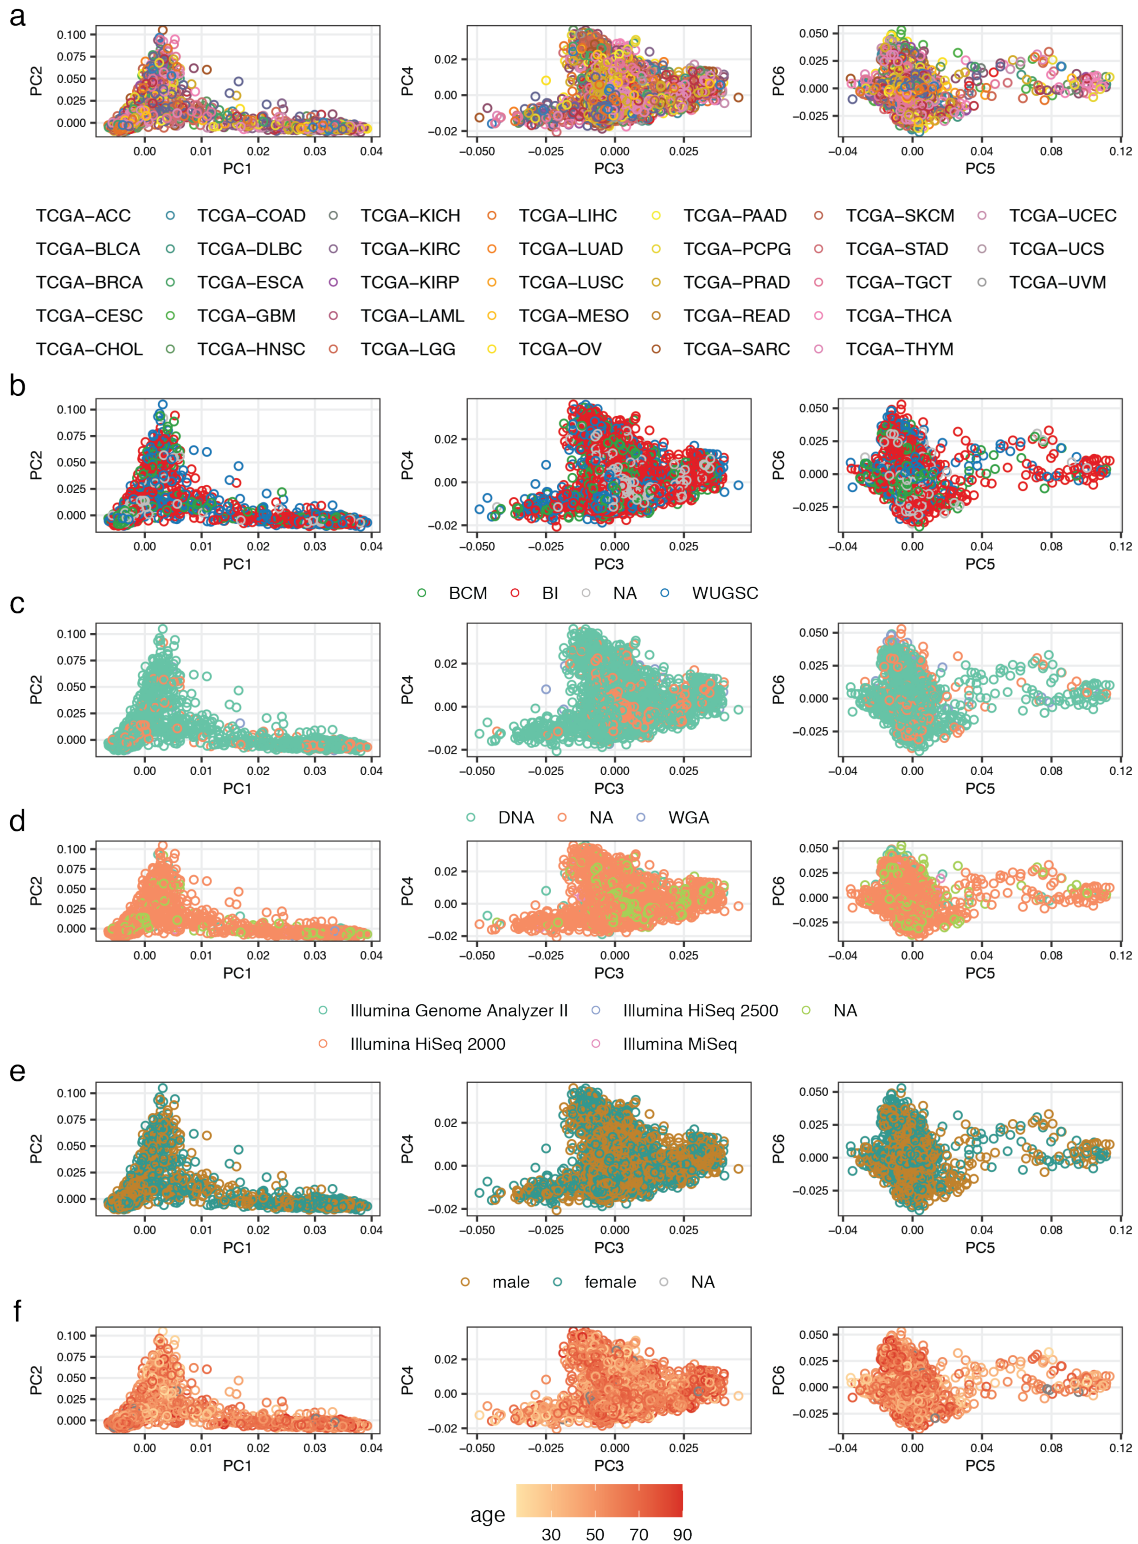

**Supplementary Fig. 40: Principal component analysis on common germline variants in TCGA-WES.** Principal components 1 to 6 color coded by **a**, TCGA project id, **b**, sequencing center, **c**, whole genome amplification (WGA) status prior to sequencing, **d**, sequencer, **e** gender, and **f**, age of diagnosis.

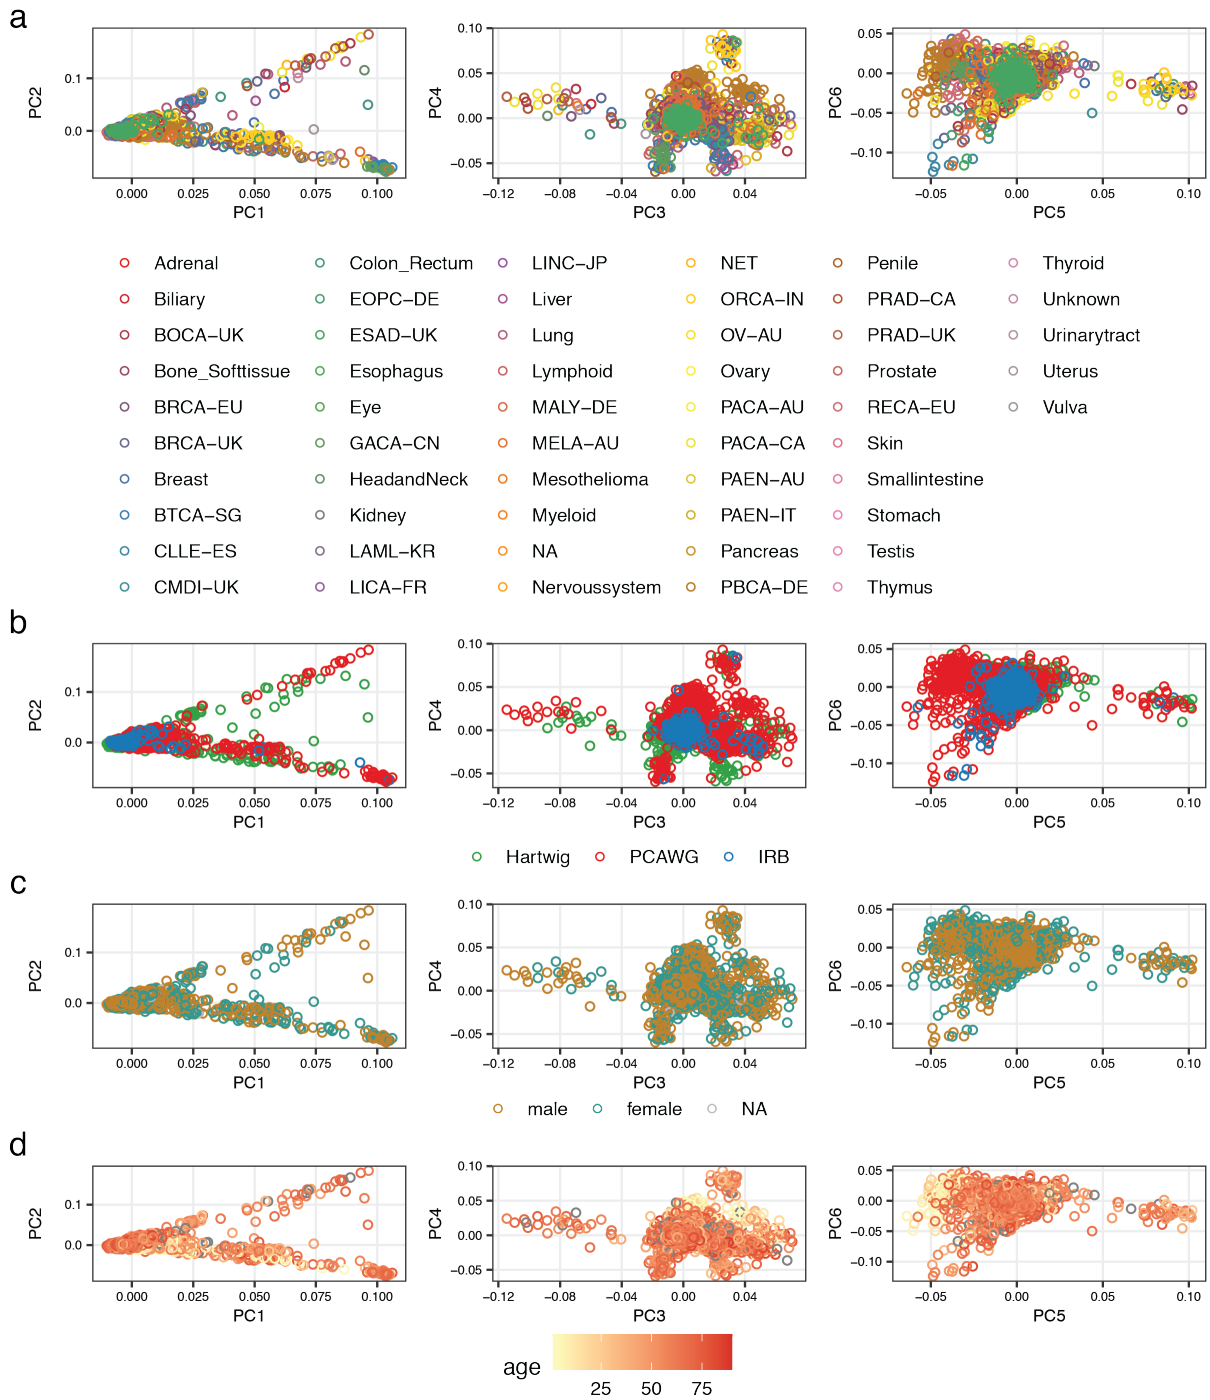

**Supplementary Fig. 41: Principal component analysis on common germline variants in PCAWG\_Hartwig-WGS.** Principal components 1 to 6 color coded by **a**, PCAWG project id or Hartwig tissue of origin, **b**, center/study where germline variants were called, **c**, gender, **d**, age of diagnosis.

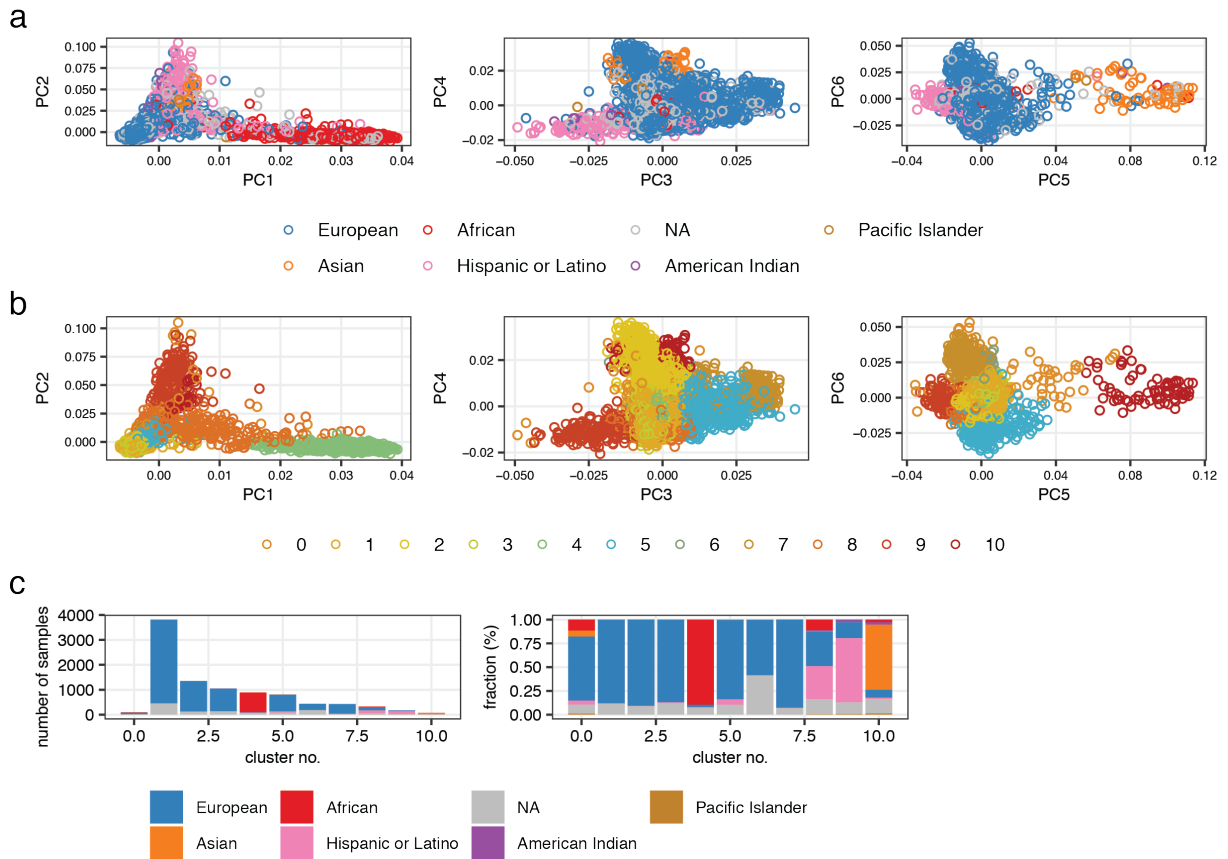

**Supplementary Fig. 42: Extraction of European individuals in TCGA-WES.** Principal components 1 to 6 color coded by **a**, reported ethnicities and **b**, clustering results using the first 10 principal components. **c**, Overview of clustering results. Samples which could not be assigned to a cluster (cluster no. 0) were excluded.

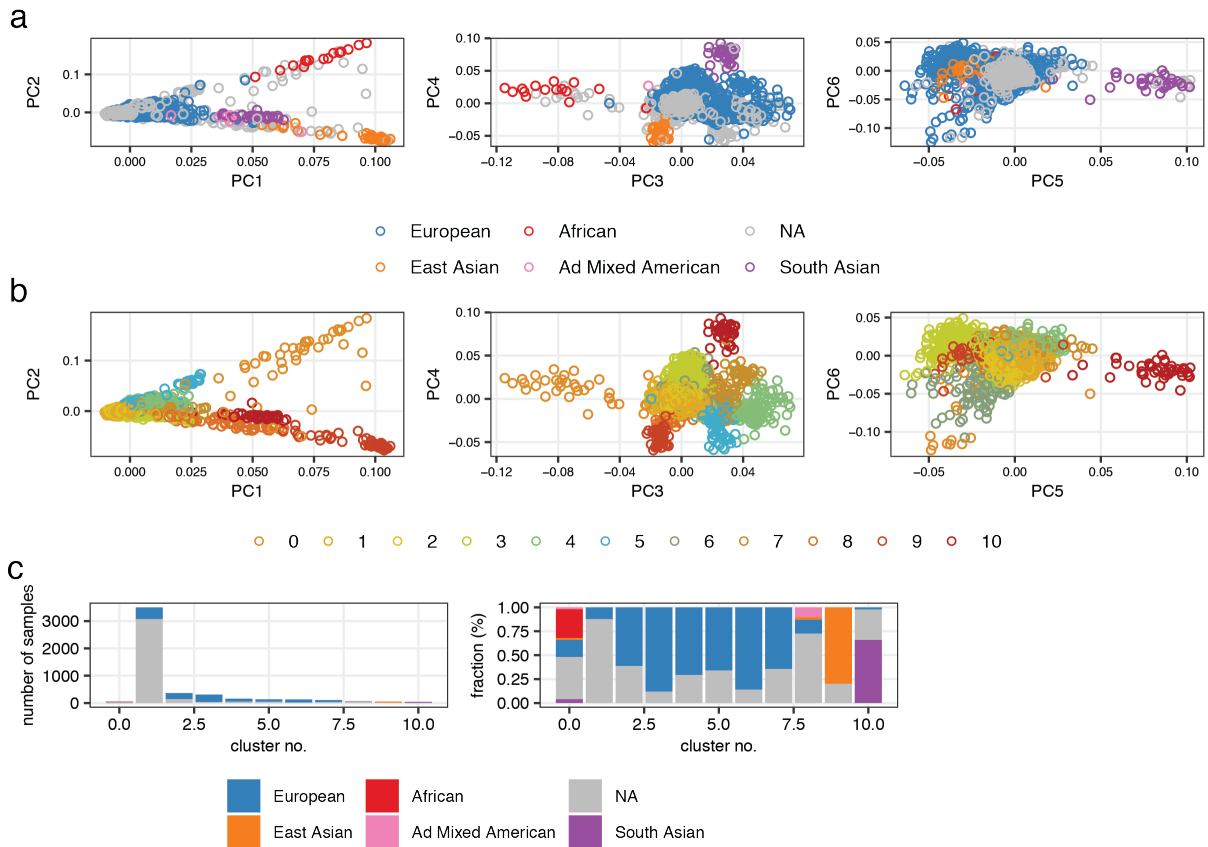

**Supplementary Fig. 43: Extraction of European individuals in PCAWG\_Hartwig-WGS.** Principal components 1 to 6 color coded by **a**, reported ethnicities and **b**, clustering results using the first 10 principal components. **c**, Overview of clustering results. Samples which could not be assigned to a cluster (cluster no. 0) were excluded.

## 2.14 Comparison Between WES and WGS Extracted Somatic Features

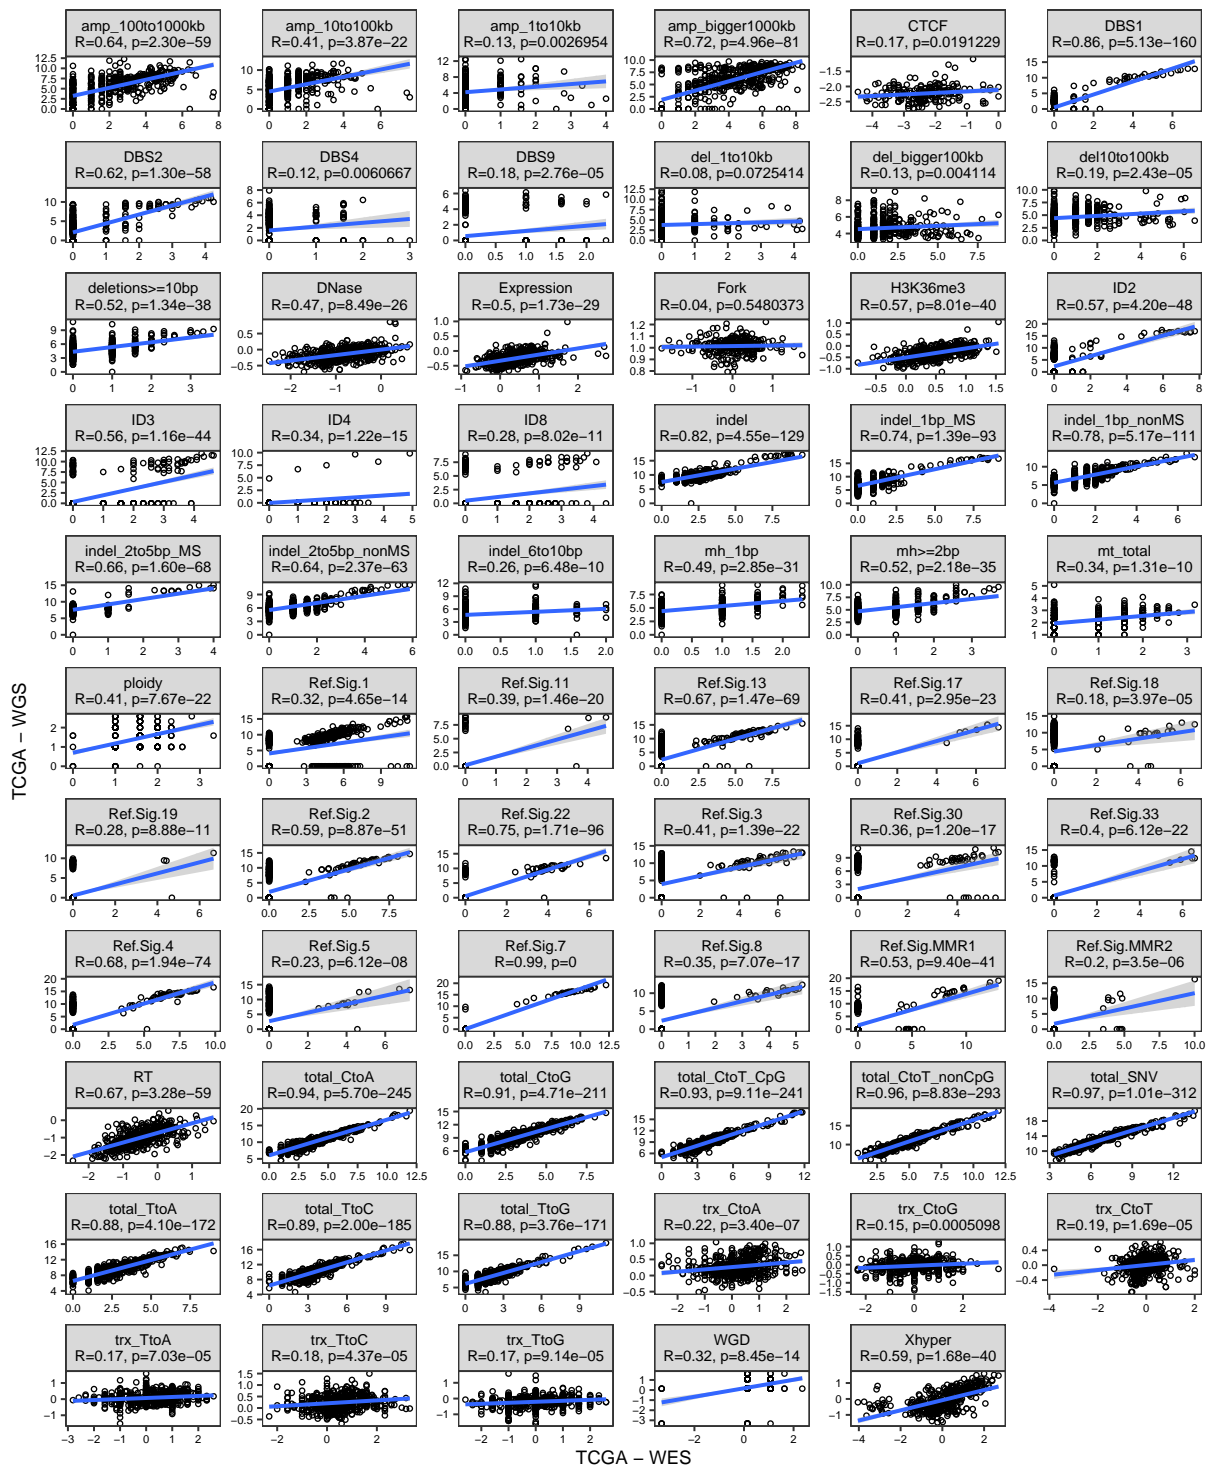

**Supplementary Fig. 44: Comparison between WES and WGS extracted somatic features in TCGA.** Somatic features were extracted from around 530 individuals from TCGA for which WES as well as WGS data was available. Somatic feature measured in TCGA-WES on the x-axis and in TCGA-WGS on the y-axis. One plot for each somatic features with Pearson correlation and associated p-value from a test for association between paired samples two-sided. Fork: replicative strand bias, RT: replication timing, trx: transcription strand bias, Xhyper: Chromosome X hypermutation.

### 3 Supplementary Tables

#### 3.1 Replicates Genes - Minimal Distances

**Supplementary Table 1: Closest distance between newly replicated genes at a FDR of 2 % and known dMMR/dHR genes.** Showing the minimal distance on the respective chromosome between each of the 81 newly replicated genes at a FDR of 2 % and known dMMR (*MSH2*, *MSH6*, and *MLH1*) and dHR (*BRCA1*, *BRCA2*, *PALB2*, and *RAD51C*) genes. Closest distance was calculated using the distance between transcript start and end using RefSeq annotation hg38.

| Gene           | Closest Gene  | Distance in Megabases | Gene            | Closest Gene | Distance in Megabases |
|----------------|---------------|-----------------------|-----------------|--------------|-----------------------|
| <i>ACTL6A</i>  | <i>MLH1</i>   | 142.51                | <i>NCAPG2</i>   | <i>PMS2</i>  | 152.62                |
| <i>ANKRD28</i> | <i>MLH1</i>   | 21.13                 | <i>NFRKB</i>    | none         | -                     |
| <i>APC</i>     | none          | -                     | <i>NUDT7</i>    | <i>PALB2</i> | 54.08                 |
| <i>APEX1</i>   | none          | -                     | <i>PADI4</i>    | none         | -                     |
| <i>AQR</i>     | none          | -                     | <i>PARP3</i>    | <i>MLH1</i>  | 14.89                 |
| <i>ASCC2</i>   | none          | -                     | <i>PAXIP1</i>   | <i>PMS2</i>  | 148.93                |
| <i>ASCC3</i>   | none          | -                     | <i>PER1</i>     | <i>BRCA1</i> | 34.89                 |
| <i>ATR</i>     | <i>MLH1</i>   | 105.4                 | <i>PHF8</i>     | none         | -                     |
| <i>AXIN2</i>   | <i>RAD51C</i> | 6.79                  | <i>PIAS1</i>    | none         | -                     |
| <i>CCNA1</i>   | <i>BRCA2</i>  | 4.03                  | <i>PIF1</i>     | none         | -                     |
| <i>CHD3</i>    | <i>BRCA1</i>  | 35.13                 | <i>PIK3C2B</i>  | none         | -                     |
| <i>COL7A1</i>  | <i>MLH1</i>   | 11.51                 | <i>POT1</i>     | <i>PMS2</i>  | 118.81                |
| <i>DIS3L2</i>  | <i>MSH6</i>   | 184.15                | <i>PRMT7</i>    | <i>PALB2</i> | 44.67                 |
| <i>DNMT1</i>   | none          | -                     | <i>PRPF19</i>   | none         | -                     |
| <i>DOCK8</i>   | none          | -                     | <i>RAD51</i>    | none         | -                     |
| <i>ELP2</i>    | none          | -                     | <i>RBBP5</i>    | none         | -                     |
| <i>EP300</i>   | none          | -                     | <i>RBBP6</i>    | <i>PALB2</i> | 0.9                   |
| <i>EXO1</i>    | none          | -                     | <i>RBBP8</i>    | none         | -                     |
| <i>EYA2</i>    | none          | -                     | <i>RECQL</i>    | none         | -                     |
| <i>FANCC</i>   | none          | -                     | <i>REV3L</i>    | none         | -                     |
| <i>FANCM</i>   | none          | -                     | <i>RIF1</i>     | <i>MSH6</i>  | 103.6                 |
| <i>HERC2</i>   | none          | -                     | <i>SETD1A</i>   | <i>PALB2</i> | 7.32                  |
| <i>HMG20B</i>  | none          | -                     | <i>SETD2</i>    | <i>MLH1</i>  | 9.97                  |
| <i>JADE2</i>   | none          | -                     | <i>SETX</i>     | none         | -                     |
| <i>KANSL1</i>  | <i>BRCA1</i>  | 2.9                   | <i>SMARCAL1</i> | <i>MSH6</i>  | 168.61                |
| <i>KANSL3</i>  | <i>MSH6</i>   | 48.79                 | <i>SMC1A</i>    | none         | -                     |
| <i>KDM1A</i>   | none          | -                     | <i>SMC1B</i>    | none         | -                     |
| <i>KDM6A</i>   | none          | -                     | <i>SMC2</i>     | none         | -                     |
| <i>KDM6B</i>   | <i>BRCA1</i>  | 35.19                 | <i>SOS1</i>     | <i>MSH2</i>  | 8.28                  |
| <i>KMT2B</i>   | none          | -                     | <i>SUPT20H</i>  | <i>BRCA2</i> | 4.61                  |
| <i>KMT2D</i>   | none          | -                     | <i>TELO2</i>    | <i>PALB2</i> | 22.09                 |
| <i>KMT2E</i>   | <i>PMS2</i>   | 98.93                 | <i>TIMELESS</i> | none         | -                     |
| <i>KMT5A</i>   | none          | -                     | <i>TOP2A</i>    | <i>BRCA1</i> | 2.63                  |
| <i>MAD2L2</i>  | none          | -                     | <i>TOP3B</i>    | none         | -                     |
| <i>MDN1</i>    | none          | -                     | <i>TP53BP1</i>  | none         | -                     |
| <i>MLH3</i>    | none          | -                     | <i>TRRAP</i>    | <i>PMS2</i>  | 92.87                 |
| <i>MSH3</i>    | none          | -                     | <i>TTI2</i>     | none         | -                     |
| <i>MSL2</i>    | <i>MLH1</i>   | 99.1                  | <i>VPS72</i>    | none         | -                     |
| <i>MTOR</i>    | none          | -                     | <i>WRN</i>      | none         | -                     |
| <i>MUS81</i>   | none          | -                     | <i>ZRANB3</i>   | <i>MSH6</i>  | 87.39                 |
| <i>NCAPD2</i>  | none          | -                     |                 |              |                       |

## 3.2 Genomic Regions

**Supplementary Table 2: Covered Genomic Regions with WES and WGS Masks.** Estimated lengths of different genomic regions in megabases after applying CRG75 alignability mask on WES and WGS data respectively.

| Region        | Bin                          | Size in WES in Megabases | Size in WGS in Megabases |
|---------------|------------------------------|--------------------------|--------------------------|
| RT            | 1of6 (late)                  | 1.62                     | 345                      |
|               | 2of6                         | 4.03                     | 382                      |
|               | 3of6                         | 7.94                     | 381                      |
|               | 4of6                         | 12.0                     | 379                      |
|               | 5of6                         | 16.7                     | 373                      |
|               | 6of6 (early)                 | 29.2                     | 356                      |
| H3K36me3      | 0of5 (no marks)              | 71.0                     | 3,705                    |
|               | 1of5                         | 6.63                     | 143                      |
|               | 2of5                         | 8.54                     | 143                      |
|               | 3of5                         | 11.3                     | 144                      |
|               | 4of5                         | 16.1                     | 147                      |
|               | 5of5 (high density of marks) | 29.4                     | 152                      |
| Expression    | 0of5 (no expression)         | 7.54                     | 2,050                    |
|               | 1of5                         | 14.9                     | 374                      |
|               | 2of5                         | 17.0                     | 425                      |
|               | 3of5                         | 24.2                     | 523                      |
|               | 4of5                         | 34.9                     | 531                      |
|               | 5of5 (high expression)       | 44.4                     | 531                      |
| DNase I       | 0of5 (no marks)              | 95.7                     | 3,758                    |
|               | 1of5                         | 6.89                     | 137                      |
|               | 2of5                         | 7.68                     | 136                      |
|               | 3of5                         | 8.85                     | 135                      |
|               | 4of5                         | 9.95                     | 134                      |
|               | 5of5 (high density of marks) | 9.95                     | 134                      |
| CTCF/cohesin  | flanking site $\pm$ 500 bp   | 7.04                     | 83.2                     |
|               | binding site                 | 1.56                     | 17.38                    |
| Fork polarity | 1of10 (lagging strand)       | 7.71                     | 199                      |
|               | 2of10                        | 7.65                     | 196                      |
|               | 9of10                        | 6.75                     | 195                      |
|               | 10of10 (leading strand)      | 5.54                     | 200                      |

---

### 3.3 Somatic Components

**Supplementary Table 3: Somatic Component Names.**

| <b>Component</b> | <b>Name</b>              |
|------------------|--------------------------|
| IC1              | Sig.17                   |
| IC2              | Sig.MMR2+ampli.          |
| IC3              | dMMR <sub>ICA</sub>      |
| IC4              | dHR <sub>ICA</sub>       |
| IC5              | Deletions <sub>ICA</sub> |
| IC6              | APOBEC <sub>ICA</sub>    |
| IC7              | Sig.18                   |
| IC8              | Ploidy                   |
| IC9              | Sig.11+19                |
| IC10             | DBS2                     |
| IC11             | Sig.5 <sub>ICA</sub>     |
| IC12             | Smoking <sub>ICA</sub>   |
| IC13             | Small indels 2bp         |
| IC14             | UV <sub>ICA</sub>        |
| IC15             | Sig.8                    |
| VAE_1            | APOBEC <sub>VAE2</sub>   |
| VAE_2            | Deletions <sub>VAE</sub> |
| VAE_3            | Sig.5 <sub>VAE</sub>     |
| VAE_4            | Sig.1                    |
| VAE_5            | UV <sub>VAE</sub>        |
| VAE_6            | dHR <sub>VAE1</sub>      |
| VAE_7            | Mitochondria             |
| VAE_8            | dHR <sub>VAE2</sub>      |
| VAE_9            | Smoking <sub>VAE</sub>   |
| VAE_10           | dMMR <sub>VAE2</sub>     |
| VAE_11           | APOBEC <sub>VAE1</sub>   |
| VAE_12           | X-hypermutation          |
| VAE_13           | dMMR <sub>VAE1</sub>     |
| VAE_14           | Amplifications           |

---

## 3.4 Cancer Types

**Supplementary Table 4: TCGA Study Abbreviations.** <https://gdc.cancer.gov/resources-tcga-users/tcga-code-tables/tcga-study-abbreviations>. List of studies, which were ultimately used in association testing (after filtering steps).

| <b>Study Abbreviation</b> | <b>Study Name</b>                                                |
|---------------------------|------------------------------------------------------------------|
| ACC                       | Adrenocortical carcinoma                                         |
| BLCA                      | Bladder Urothelial Carcinoma                                     |
| BRCA                      | Breast invasive carcinoma                                        |
| CESC                      | Cervical squamous cell carcinoma and endocervical adenocarcinoma |
| CHOL                      | Cholangiocarcinoma                                               |
| COAD                      | Colon adenocarcinoma                                             |
| DLBC                      | Lymphoid Neoplasm Diffuse Large B-cell Lymphoma                  |
| ESCA                      | Esophageal carcinoma                                             |
| GBM                       | Glioblastoma multiforme                                          |
| HNSC                      | Head and Neck squamous cell carcinoma                            |
| KICH                      | Kidney Chromophobe                                               |
| KIRC                      | Kidney renal clear cell carcinoma                                |
| KIRP                      | Kidney renal papillary cell carcinoma                            |
| LAML                      | Acute Myeloid Leukemia                                           |
| LGG                       | Brain Lower Grade Glioma                                         |
| LIHC                      | Liver hepatocellular carcinoma                                   |
| LUAD                      | Lung adenocarcinoma                                              |
| LUSC                      | Lung squamous cell carcinoma                                     |
| MESO                      | Mesothelioma                                                     |
| OV                        | Ovarian serous cystadenocarcinoma                                |
| PAAD                      | Pancreatic adenocarcinoma                                        |
| PCPG                      | Pheochromocytoma and Paraganglioma                               |
| PRAD                      | Prostate adenocarcinoma                                          |
| READ                      | Rectum adenocarcinoma                                            |
| SARC                      | Sarcoma                                                          |
| SKCM                      | Skin Cutaneous Melanoma                                          |
| STAD                      | Stomach adenocarcinoma                                           |
| THCA                      | Thyroid carcinoma                                                |
| THYM                      | Thymoma                                                          |
| UCEC                      | Uterine Corpus Endometrial Carcinoma                             |
| UCS                       | Uterine Carcinosarcoma                                           |
| UVM                       | Uveal Melanoma                                                   |

**Supplementary Table 5: PCAWG Study Abbreviations.** <https://dcc.icgc.org/projects/details>. List of studies, which were ultimately used in association testing (after filtering steps).

| Study Abbreviation | Study Name                                 |
|--------------------|--------------------------------------------|
| BOCA-UK            | Bone Cancer - UK                           |
| BRCA-EU            | Breast ER+ and HER2- Cancer - EU/UK        |
| BRCA-UK            | Breast Triple Negative/Lobular Cancer - UK |
| BTCA-SG            | Biliary Tract Cancer - SG                  |
| CLLE-ES            | Chronic Lymphocytic Leukemia - ES          |
| CMDI-UK            | Chronic Myeloid Disorders - UK             |
| EOPC-DE            | Early Onset Prostate Cancer - DE           |
| ESAD-UK            | Esophageal Adenocarcinoma - UK             |
| LICA-FR            | Liver Cancer - FR                          |
| MALY-DE            | Malignant Lymphoma - DE                    |
| MELA-AU            | Skin Cancer - AU                           |
| OV-AU              | Ovarian Cancer - AU                        |
| PACA-AU            | Pancreatic Cancer - AU                     |
| PACA-CA            | Pancreatic Cancer - CA                     |
| PAEN-AU            | Pancreatic Cancer Endocrine neoplasms - AU |
| PAEN-IT            | Pancreatic Endocrine Neoplasms - IT        |
| PBCA-DE            | Pediatric Brain Cancer - DE                |
| PRAD-CA            | Prostate Adenocarcinoma - CA               |
| PRAD-UK            | Prostate Adenocarcinoma - UK               |
| RECA-EU            | Renal Cell Cancer - EU/FR                  |

**Supplementary Table 6: Cancer Type Names.** Cancer type names used in this study and respective cancer types from TCGA, PCAWG, and Hartwig which were assigned to it. EAC: oesophageal adenocarcinoma.

| Cancer Type Name   | Discovery                            |                     | Validation                   |
|--------------------|--------------------------------------|---------------------|------------------------------|
|                    | TCGA Cancer Type                     | PCAWG Project ID(s) | Hartwig Cancer Type(s)       |
| Bladder            | BLCA                                 | -                   | Urinarytract                 |
| Brain_glioma_low   | LGG                                  | PBCA-DE             | Nervoussystem_Gliomas or _NA |
| Brain_glioma_multi | GBM                                  | PBCA-DE             | Nervoussystem_Gliomas or _NA |
| Breast             | BRCA                                 | BRCA-EU, BRCA-UK    | Breast                       |
| Colon_Rectum       | COAD, READ                           | -                   | Colon_Rectum                 |
| Kidney             | KIRC, KIRP                           | RECA-EU             | Kidney                       |
| Lung_ad            | LUAD                                 | -                   | Lung                         |
| Lung_sq            | LUSC                                 | -                   | Lung                         |
| Ovary              | OV                                   | OV-AU               | Ovary                        |
| Prostate           | PRAD                                 | PRAD-CA, PRAD-UK    | Prostate                     |
| Skin               | SKCM                                 | MELA-AU_Cutaneous   | Skin_Melanoma or _NA         |
| Stomach_Eso        | STAD, ESCA (EAC only <sup>13</sup> ) | GACA-CN, ESAD-UK    | Stomach, Esophagus           |

---

**Supplementary Table 7: Overview of sample sizes.** Corresponding cancer types for the cancer type names can be found in Table 6.

| <b>Cancer Type Name</b> | <b>Discovery cohort sample size</b> | <b>Validation cohort sample size</b> |
|-------------------------|-------------------------------------|--------------------------------------|
| Bladder                 | 323                                 | 87                                   |
| Brain_glioma_low        | 405                                 | 283                                  |
| Brain_glioma_multi      | 253                                 | 283                                  |
| Breast                  | 684                                 | 656                                  |
| Colon_Rectum            | 410                                 | 417                                  |
| Kidney                  | 445                                 | 168                                  |
| Lung_ad                 | 434                                 | 299                                  |
| Lung_sq                 | 373                                 | 299                                  |
| Ovary                   | 199                                 | 180                                  |
| Prostate                | 386                                 | 443                                  |
| Skin                    | 403                                 | 370                                  |
| Stomach_Eso             | 363                                 | 431                                  |
| Pancan                  | 6,799                               | 4,683                                |

**Supplementary Table 8: Matching GTEx tissues with cancer types in TCGA for proportion expressed across transcripts (PEXT) metric<sup>14</sup>.** List showing with which GTEx tissue each cancer type was matched with. Matching was mostly guided by a previous study<sup>15</sup>. When no matching GTEx tissue was identified, mean proportion value from PEXT was used.

| TCGA cancer type | Matching GTEx tissue     |
|------------------|--------------------------|
| ACC              | AdrenalGland             |
| BLCA             | Bladder                  |
| BRCA             | Breast_MammaryTissue     |
| CESC             | Vagina                   |
| CHOL             | mean_proportion          |
| COAD             | Colon_Transverse         |
| DLBC             | WholeBlood               |
| ESCA             | Esophagus_Mucosa         |
| GBM              | Brain_Substantianigra    |
| HNSC             | mean_proportion          |
| KICH             | Kidney_Cortex            |
| KIRP             | Kidney_Cortex            |
| KIRC             | Kidney_Cortex            |
| LAML             | WholeBlood               |
| LGG              | Brain_Amygdala           |
| LIHC             | Liver                    |
| LUAD             | Lung                     |
| LUSC             | Lung                     |
| MESO             | mean_proportion          |
| OV               | Ovary                    |
| PAAD             | Pancreas                 |
| PCPG             | Pituitary                |
| PRAD             | Prostate                 |
| READ             | mean_proportion          |
| SARC             | mean_proportion          |
| SKCM             | Skin_SunExposed_Lowerleg |
| STAD             | Stomach                  |
| THCA             | Thyroid                  |
| THYM             | mean_proportion          |
| UCEC             | FallopianTube            |
| UCS              | Cervix_Endocervix        |
| UVM              | mean_proportion          |

**Supplementary Table 9: Matching GTEx tissues with cancer types in PCAWG for proportion expressed across transcripts (PEXT) metric<sup>14</sup>.** List showing with which GTEx tissue each cancer type was matched with. When no matching GTEx tissue was identified, mean proportion value from PEXT was used.

| <b>PCAWG cancer type</b> | <b>Matching GTEx tissue</b> |
|--------------------------|-----------------------------|
| BOCA-UK                  | mean_proportion             |
| BRCA-EU                  | Breast_MammaryTissue        |
| BRCA-UK                  | Breast_MammaryTissue        |
| BTCA-SG                  | mean_proportion             |
| CLLE-ES                  | WholeBlood                  |
| CMDI-UK                  | WholeBlood                  |
| EOPC-DE                  | Prostate                    |
| ESAD-UK                  | Esophagus_Mucosa            |
| GACA-CN                  | Stomach                     |
| LAML-KR                  | WholeBlood                  |
| LICA-FR                  | Liver                       |
| LINC-JP                  | Liver                       |
| LIRI-JP                  | Liver                       |
| MALY-DE                  | WholeBlood                  |
| MELA-AU                  | Skin_SunExposed_Lowerleg    |
| ORCA-IN                  | mean_proportion             |
| OV-AU                    | Ovary                       |
| PACA-AU                  | Pancreas                    |
| PACA-CA                  | Pancreas                    |
| PAEN-AU                  | Pancreas                    |
| PAEN-IT                  | Pancreas                    |
| PBCA-DE                  | mean_proportion             |
| PRAD-CA                  | Prostate                    |
| PRAD-UK                  | Prostate                    |
| RECA-AU                  | Kidney_Cortex               |

**Supplementary Table 10: Matching GTEx tissues with cancer types in Hartwig for proportion expressed across transcripts (PEXT) metric<sup>14</sup>.** List showing with which GTEx tissue each cancer type was matched with. When no matching GTEx tissue was identified, mean proportion value from PEXT was used.

| Hartwig cancer type | Matching GTEx tissue        |
|---------------------|-----------------------------|
| Adrenal             | AdrenalGland                |
| Biliary             | mean_proportion             |
| Bone_Softtissue     | mean_proportion             |
| Breast              | Breast_MammaryTissue        |
| Colon_Rectum        | Colon_Transverse            |
| Doubleprimary       | mean_proportion             |
| Esophagus           | Esophagus_Mucosa            |
| Eye                 | mean_proportion             |
| HeadandNeck         | mean_proportion             |
| Kidney              | Kidney_Cortex               |
| Liver               | Liver                       |
| Lung                | Lung                        |
| Lymphoid            | WholeBlood                  |
| Mesothelioma        | mean_proportion             |
| Myeloid             | WholeBlood                  |
| Nervoussystem       | mean_proportion             |
| NET                 | mean_proportion             |
| Ovary               | Ovary                       |
| Pancreas            | Pancreas                    |
| Penile              | mean_proportion             |
| Prostate            | Prostate                    |
| Skin                | Skin_SunExposed_Lowerleg    |
| Smallintestine      | SmallIntestine_Terminalleum |
| Stomach             | Stomach                     |
| Testis              | Testis                      |
| Thymus              | mean_proportion             |
| Thyroid             | Thyroid                     |
| Unknown             | mean_proportion             |
| Urinarytract        | Bladder                     |
| Uterus              | Uterus                      |
| Vulva               | Vagina                      |

---

## 4 Supplementary References

1. Degasperi, A. *et al.* A practical framework and online tool for mutational signature analyses show inter-tissue variation and driver dependencies. *Nat Cancer* **1**, 249-263 (2020).
2. Alexandrov, L.B. *et al.* Signatures of mutational processes in human cancer. *Nature* **500**, 415-21 (2013).
3. Kucab, J.E. *et al.* A Compendium of Mutational Signatures of Environmental Agents. *Cell* **177**, 821-836 e16 (2019).
4. Hwang, S. *et al.* HumanNet v2: human gene networks for disease research. *Nucleic Acids Res* **47**, D573-D580 (2019).
5. Wu, Y., Poulos, R.C. & Reddel, R.R. Role of POT1 in Human Cancer. *Cancers (Basel)* **12** (2020).
6. Stinus, S., Paeschke, K. & Chang, M. Telomerase regulation by the Pif1 helicase: a length-dependent effect? *Curr Genet* **64**, 509-513 (2018).
7. Sieverling, L. *et al.* Genomic footprints of activated telomere maintenance mechanisms in cancer. *Nat Commun* **11**, 733 (2020).
8. Li, F. *et al.* The histone mark H3K36me3 regulates human DNA mismatch repair through its interaction with MutSalpha. *Cell* **153**, 590-600 (2013).
9. Huang, Y., Gu, L. & Li, G.M. H3K36me3-mediated mismatch repair preferentially protects actively transcribed genes from mutation. *J Biol Chem* **293**, 7811-7823 (2018).
10. Supek, F. & Lehner, B. Clustered Mutation Signatures Reveal that Error-Prone DNA Repair Targets Mutations to Active Genes. *Cell* **170**, 534-547 e23 (2017).
11. Derkach, A., Zhang, H. & Chatterjee, N. Power Analysis for Genetic Association Test (PAGEANT) provides insights to challenges for rare variant association studies. *Bioinformatics* **34**, 1506-1513 (2018).
12. Karczewski, K.J. *et al.* The mutational constraint spectrum quantified from variation in 141,456 humans. *Nature* **581**, 434-443 (2020).
13. Cancer Genome Atlas Research, N. *et al.* Integrated genomic characterization of oesophageal carcinoma. *Nature* **541**, 169-175 (2017).
14. Cummings, B.B. *et al.* Transcript expression-aware annotation improves rare variant interpretation. *Nature* **581**, 452-458 (2020).

- 
15. Zeng, W.Z.D., Glicksberg, B.S., Li, Y. & Chen, B. Selecting precise reference normal tissue samples for cancer research using a deep learning approach. *BMC Med Genomics* **12**, 21 (2019).
