# Supplementary material for: The impact of rare germline variants on human somatic mutation processes
Source: Springer Nature journal article supplement (doi:10.1038/s41467-022-31483-1), 2022-06-28
Supplement: MOESM3 [file 41467_2022_31483_MOESM3_ESM.pdf]

### **Description of Additional Supplementary Files**

Supplementary Text, Figures and Tables.

Supplementary Dataset 1: List of 891 selected genes used for testing in this study.

Supplementary Dataset 2: List of genes replicating at a FDR of 1 %.

Supplementary Dataset 3: List of genes replicating at a FDR of 2 %.
