# Supplementary material for: The impact of rare germline variants on human somatic mutation processes
Source: Nat Commun. 2022 Jun 28;13:3724. doi: 10.1038/s41467-022-31483-1 (PMC9240060; doi:10.1038/s41467-022-31483-1)
Supplement: Supplementary file 4 — Supplementary Dataset [file 41467_2022_31483_MOESM4_ESM.xlsx]

## Sheet: Content
	Content
	Supplementay Dataset 1: List of 891 selected genes used for testing in this study.
	Supplementay Dataset 2: List of genes replicating at a FDR of 1 %.
	Supplementay Dataset 3: List of genes replicating at a FDR of 2 %.

## Sheet: Supplementary Dataset 1
Supplementary Dataset 1		List of 891 selected genes used for testing in this study.
Name	source
DDR_gene	list of DNA damage response genes were obtained from https://doi.org/10.1038/nrc3891
Cancer_Predisposition	list of cancer predisposition genes from https://doi.org/10.1038/nature12981
path_X	genes in specific DNA repair pathways from https://pathcards.genecards.org
MSH2_stability	genes regulating MSH2 stability from https://doi.org/10.1038/nm.2430
Coleho_Yeast	genes reported to cause genetic instability in Saccharomyces cerevisiae from https://doi.org/10.1038/s41586-019-0887-y
genes	source
ABL1	path_DoubleStrandRepair&DDR_gene
ABRAXAS1	path_DoubleStrandRepair
ACTB	path_DoubleStrandRepair&path_Chromatin_Organization
ACTL6A	path_DoubleStrandRepair&path_Chromatin_Organization&DDR_gene
ACTR5	path_DoubleStrandRepair&DDR_gene
ACTR8	path_DoubleStrandRepair&DDR_gene
ALKBH2	path_DoubleStrandRepair&DDR_gene
ALKBH3	path_DoubleStrandRepair&DDR_gene
ALKBH5	path_DoubleStrandRepair
APBB1	path_DoubleStrandRepair
APEX1	path_DoubleStrandRepair&DDR_gene
AQR	path_DoubleStrandRepair
ASCC1	path_DoubleStrandRepair
ASCC2	path_DoubleStrandRepair
ASCC3	path_DoubleStrandRepair
ATM	path_DoubleStrandRepair&Coleho_Yeast&Cancer_Predisposition&DDR_gene
ATR	path_DoubleStrandRepair&DDR_gene
ATRIP	path_DoubleStrandRepair&DDR_gene
BABAM1	path_DoubleStrandRepair
BABAM2	path_DoubleStrandRepair
BAP1	path_DoubleStrandRepair&Cancer_Predisposition&DDR_gene
BARD1	path_DoubleStrandRepair&DDR_gene
BAZ1B	path_DoubleStrandRepair&DDR_gene
BLM	path_DoubleStrandRepair&Cancer_Predisposition&DDR_gene
BRCA1	path_DoubleStrandRepair&Cancer_Predisposition&DDR_gene
BRCA2	path_DoubleStrandRepair&Cancer_Predisposition&DDR_gene
BRCC3	path_DoubleStrandRepair&DDR_gene
BRIP1	path_DoubleStrandRepair&Cancer_Predisposition&DDR_gene
CCNA1	path_DoubleStrandRepair&DDR_gene
CCNA2	path_DoubleStrandRepair&DDR_gene
CCNB1	path_DoubleStrandRepair&DDR_gene
CCNH	path_DoubleStrandRepair&DDR_gene
CDC25C	path_DoubleStrandRepair
CDK1	path_DoubleStrandRepair
CDK2	path_DoubleStrandRepair&DDR_gene
CDK7	path_DoubleStrandRepair&DDR_gene
CENPS	path_DoubleStrandRepair
CENPX	path_DoubleStrandRepair
CETN2	path_DoubleStrandRepair&DDR_gene
CHD1L	path_DoubleStrandRepair
CHEK1	path_DoubleStrandRepair&DDR_gene
CHEK2	path_DoubleStrandRepair&Cancer_Predisposition&DDR_gene
CLSPN	path_DoubleStrandRepair&DDR_gene
COPS2	path_DoubleStrandRepair&DDR_gene
COPS3	path_DoubleStrandRepair&DDR_gene
COPS4	path_DoubleStrandRepair&DDR_gene
COPS5	path_DoubleStrandRepair&DDR_gene
COPS6	path_DoubleStrandRepair&DDR_gene
COPS7A	path_DoubleStrandRepair&DDR_gene
COPS7B	path_DoubleStrandRepair&DDR_gene
COPS8	path_DoubleStrandRepair&DDR_gene
CUL4A	path_DoubleStrandRepair&DDR_gene
CUL4B	path_DoubleStrandRepair
DCLRE1A	path_DoubleStrandRepair&DDR_gene
DCLRE1B	path_DoubleStrandRepair&DDR_gene
DCLRE1C	path_DoubleStrandRepair&DDR_gene
DDB1	path_DoubleStrandRepair&DDR_gene
DDB2	path_DoubleStrandRepair&Cancer_Predisposition&DDR_gene
DNA2	path_DoubleStrandRepair&DDR_gene
DNTT	path_DoubleStrandRepair&DDR_gene
DTL	path_DoubleStrandRepair
ELL	path_DoubleStrandRepair
EME1	path_DoubleStrandRepair&DDR_gene
EME2	path_DoubleStrandRepair&DDR_gene
EP300	path_DoubleStrandRepair&path_Chromatin_Organization
ERCC1	path_DoubleStrandRepair&DDR_gene
ERCC2	path_DoubleStrandRepair&Cancer_Predisposition&DDR_gene
ERCC3	path_DoubleStrandRepair&Cancer_Predisposition&DDR_gene
ERCC4	path_DoubleStrandRepair&Coleho_Yeast&Cancer_Predisposition&DDR_gene
ERCC5	path_DoubleStrandRepair&Cancer_Predisposition&DDR_gene
ERCC6	path_DoubleStrandRepair&DDR_gene
ERCC8	path_DoubleStrandRepair&DDR_gene
EXO1	path_DoubleStrandRepair&DDR_gene
EYA1	path_DoubleStrandRepair&DDR_gene
EYA2	path_DoubleStrandRepair
EYA3	path_DoubleStrandRepair&DDR_gene
EYA4	path_DoubleStrandRepair
FAAP100	path_DoubleStrandRepair&DDR_gene
FAAP20	path_DoubleStrandRepair
FAAP24	path_DoubleStrandRepair&DDR_gene
FAN1	path_DoubleStrandRepair&DDR_gene
FANCA	path_DoubleStrandRepair&Cancer_Predisposition&DDR_gene
FANCB	path_DoubleStrandRepair&DDR_gene
FANCC	path_DoubleStrandRepair&Cancer_Predisposition&DDR_gene
FANCD2	path_DoubleStrandRepair&DDR_gene
FANCE	path_DoubleStrandRepair&DDR_gene
FANCF	path_DoubleStrandRepair&DDR_gene
FANCG	path_DoubleStrandRepair&Cancer_Predisposition&DDR_gene
FANCI	path_DoubleStrandRepair&DDR_gene
FANCL	path_DoubleStrandRepair&DDR_gene
FANCM	path_DoubleStrandRepair&DDR_gene
FEN1	path_DoubleStrandRepair&DDR_gene
FTO	path_DoubleStrandRepair
GEN1	path_DoubleStrandRepair&DDR_gene
GPS1	path_DoubleStrandRepair&DDR_gene
GTF2H1	path_DoubleStrandRepair&DDR_gene
GTF2H2	path_DoubleStrandRepair&DDR_gene
GTF2H3	path_DoubleStrandRepair&DDR_gene
GTF2H4	path_DoubleStrandRepair&DDR_gene
GTF2H5	path_DoubleStrandRepair&DDR_gene
H2AX	path_DoubleStrandRepair&path_Chromatin_Organization
H2BC1	path_DoubleStrandRepair&path_Chromatin_Organization
H2BC10	path_DoubleStrandRepair&path_Chromatin_Organization
H2BC11	path_DoubleStrandRepair&path_Chromatin_Organization
H2BC12	path_DoubleStrandRepair&path_Chromatin_Organization
H2BC13	path_DoubleStrandRepair&path_Chromatin_Organization
H2BC14	path_DoubleStrandRepair&path_Chromatin_Organization
H2BC15	path_DoubleStrandRepair&path_Chromatin_Organization
H2BC17	path_DoubleStrandRepair&path_Chromatin_Organization
H2BC21	path_DoubleStrandRepair&path_Chromatin_Organization
H2BC3	path_DoubleStrandRepair&path_Chromatin_Organization
H2BC4	path_DoubleStrandRepair&path_Chromatin_Organization
H2BC5	path_DoubleStrandRepair&path_Chromatin_Organization
H2BC6	path_DoubleStrandRepair&path_Chromatin_Organization
H2BC7	path_DoubleStrandRepair&path_Chromatin_Organization
H2BC8	path_DoubleStrandRepair&path_Chromatin_Organization
H2BC9	path_DoubleStrandRepair&path_Chromatin_Organization
H2BU1	path_DoubleStrandRepair&path_Chromatin_Organization
H3-4	path_DoubleStrandRepair
H4-16	path_DoubleStrandRepair&path_Chromatin_Organization
H4C1	path_DoubleStrandRepair&path_Chromatin_Organization
H4C11	path_DoubleStrandRepair&path_Chromatin_Organization
H4C12	path_DoubleStrandRepair&path_Chromatin_Organization
H4C13	path_DoubleStrandRepair&path_Chromatin_Organization
H4C14	path_DoubleStrandRepair&path_Chromatin_Organization
H4C15	path_DoubleStrandRepair&path_Chromatin_Organization
H4C2	path_DoubleStrandRepair&path_Chromatin_Organization
H4C3	path_DoubleStrandRepair&path_Chromatin_Organization
H4C4	path_DoubleStrandRepair&path_Chromatin_Organization
H4C5	path_DoubleStrandRepair&path_Chromatin_Organization
H4C6	path_DoubleStrandRepair&path_Chromatin_Organization
H4C8	path_DoubleStrandRepair&path_Chromatin_Organization
H4C9	path_DoubleStrandRepair&path_Chromatin_Organization
HERC2	path_DoubleStrandRepair
HMGN1	path_DoubleStrandRepair
HUS1	path_DoubleStrandRepair&DDR_gene
INO80	path_DoubleStrandRepair&DDR_gene
INO80B	path_DoubleStrandRepair&DDR_gene
INO80C	path_DoubleStrandRepair&DDR_gene
INO80D	path_DoubleStrandRepair&DDR_gene
INO80E	path_DoubleStrandRepair&DDR_gene
ISG15	path_DoubleStrandRepair
ISY1	path_DoubleStrandRepair
KAT5	path_DoubleStrandRepair&path_Chromatin_Organization&DDR_gene
KDM4A	path_DoubleStrandRepair&path_Chromatin_Organization
KDM4B	path_DoubleStrandRepair&path_Chromatin_Organization
KPNA2	path_DoubleStrandRepair
LIG1	path_DoubleStrandRepair&DDR_gene
LIG3	path_DoubleStrandRepair&DDR_gene
LIG4	path_DoubleStrandRepair&DDR_gene
LOC102724334	path_DoubleStrandRepair
MAD2L2	path_DoubleStrandRepair&DDR_gene
MAPK8	path_DoubleStrandRepair
MBD4	path_DoubleStrandRepair&DDR_gene
MCRS1	path_DoubleStrandRepair&path_Chromatin_Organization&DDR_gene
MDC1	path_DoubleStrandRepair&DDR_gene
MGMT	path_DoubleStrandRepair&DDR_gene
MIR1281	path_DoubleStrandRepair&path_Chromatin_Organization
MIR3614	path_DoubleStrandRepair
MIR4741	path_DoubleStrandRepair
MIR5193	path_DoubleStrandRepair
MIR6764	path_DoubleStrandRepair
MIR6838	path_DoubleStrandRepair
MLH1	path_DoubleStrandRepair&Cancer_Predisposition&DDR_gene
MNAT1	path_DoubleStrandRepair&DDR_gene
MPG	path_DoubleStrandRepair&DDR_gene
MRE11	path_DoubleStrandRepair
MSH2	path_DoubleStrandRepair&Coleho_Yeast&Cancer_Predisposition&DDR_gene
MSH3	path_DoubleStrandRepair&DDR_gene
MSH6	path_DoubleStrandRepair&Cancer_Predisposition&DDR_gene
MUS81	path_DoubleStrandRepair&Coleho_Yeast&DDR_gene
MUTYH	path_DoubleStrandRepair&Cancer_Predisposition&DDR_gene
NBN	path_DoubleStrandRepair&Cancer_Predisposition&DDR_gene
NEIL1	path_DoubleStrandRepair&DDR_gene
NEIL2	path_DoubleStrandRepair&DDR_gene
NFRKB	path_DoubleStrandRepair&DDR_gene
NHEJ1	path_DoubleStrandRepair&DDR_gene
NPLOC4	path_DoubleStrandRepair
NSD2	path_DoubleStrandRepair&path_Chromatin_Organization
NTHL1	path_DoubleStrandRepair&DDR_gene
OGG1	path_DoubleStrandRepair&DDR_gene
PALB2	path_DoubleStrandRepair&Cancer_Predisposition&DDR_gene
PARG	path_DoubleStrandRepair&DDR_gene
PARP1	path_DoubleStrandRepair&DDR_gene
PARP2	path_DoubleStrandRepair&DDR_gene
PAXIP1	path_DoubleStrandRepair&DDR_gene
PCLAF	path_DoubleStrandRepair
PCNA	path_DoubleStrandRepair&Coleho_Yeast&DDR_gene
PIAS1	path_DoubleStrandRepair&DDR_gene
PIAS3	path_DoubleStrandRepair&DDR_gene
PIAS4	path_DoubleStrandRepair&DDR_gene
PMS2	path_DoubleStrandRepair&Cancer_Predisposition&DDR_gene
PNKP	path_DoubleStrandRepair&DDR_gene
POLB	path_DoubleStrandRepair&DDR_gene
POLD1	path_DoubleStrandRepair&Cancer_Predisposition&DDR_gene
POLD2	path_DoubleStrandRepair&DDR_gene
POLD3	path_DoubleStrandRepair&DDR_gene
POLD4	path_DoubleStrandRepair&DDR_gene
POLE	path_DoubleStrandRepair&Cancer_Predisposition&DDR_gene
POLE2	path_DoubleStrandRepair&DDR_gene
POLE3	path_DoubleStrandRepair&DDR_gene
POLE4	path_DoubleStrandRepair&DDR_gene
POLH	path_DoubleStrandRepair&Cancer_Predisposition&DDR_gene
POLI	path_DoubleStrandRepair&DDR_gene
POLK	path_DoubleStrandRepair&DDR_gene
POLL	path_DoubleStrandRepair&DDR_gene
POLM	path_DoubleStrandRepair&DDR_gene
POLN	path_DoubleStrandRepair&DDR_gene
POLQ	path_DoubleStrandRepair&DDR_gene
POLR2A	path_DoubleStrandRepair&DDR_gene
POLR2B	path_DoubleStrandRepair&DDR_gene
POLR2C	path_DoubleStrandRepair&DDR_gene
POLR2D	path_DoubleStrandRepair&DDR_gene
POLR2E	path_DoubleStrandRepair&DDR_gene
POLR2F	path_DoubleStrandRepair&DDR_gene
POLR2G	path_DoubleStrandRepair&DDR_gene
POLR2H	path_DoubleStrandRepair&DDR_gene
POLR2I	path_DoubleStrandRepair&DDR_gene
POLR2J	path_DoubleStrandRepair&DDR_gene
POLR2K	path_DoubleStrandRepair&DDR_gene
POLR2L	path_DoubleStrandRepair&DDR_gene
PPIE	path_DoubleStrandRepair
PPP4C	path_DoubleStrandRepair&DDR_gene
PPP4R2	path_DoubleStrandRepair&DDR_gene
PPP5C	path_DoubleStrandRepair
PRKDC	path_DoubleStrandRepair&DDR_gene
PRPF19	path_DoubleStrandRepair&DDR_gene
RAD1	path_DoubleStrandRepair&DDR_gene
RAD17	path_DoubleStrandRepair&DDR_gene
RAD18	path_DoubleStrandRepair&DDR_gene
RAD23A	path_DoubleStrandRepair&DDR_gene
RAD23B	path_DoubleStrandRepair&DDR_gene
RAD50	path_DoubleStrandRepair&DDR_gene
RAD51	path_DoubleStrandRepair&DDR_gene
RAD51AP1	path_DoubleStrandRepair
RAD51B	path_DoubleStrandRepair&DDR_gene
RAD51C	path_DoubleStrandRepair&Cancer_Predisposition&DDR_gene
RAD51D	path_DoubleStrandRepair&Cancer_Predisposition&DDR_gene
RAD52	path_DoubleStrandRepair&DDR_gene
RAD9A	path_DoubleStrandRepair&DDR_gene
RAD9B	path_DoubleStrandRepair&DDR_gene
RBBP8	path_DoubleStrandRepair&DDR_gene
RBX1	path_DoubleStrandRepair&DDR_gene
RCHY1	path_DoubleStrandRepair
REV1	path_DoubleStrandRepair&DDR_gene
REV3L	path_DoubleStrandRepair&DDR_gene
RFC1	path_DoubleStrandRepair&DDR_gene
RFC2	path_DoubleStrandRepair&DDR_gene
RFC3	path_DoubleStrandRepair&DDR_gene
RFC4	path_DoubleStrandRepair&DDR_gene
RFC5	path_DoubleStrandRepair&DDR_gene
RHNO1	path_DoubleStrandRepair
RIF1	path_DoubleStrandRepair&DDR_gene
RMI1	path_DoubleStrandRepair
RMI2	path_DoubleStrandRepair&DDR_gene
RNF111	path_DoubleStrandRepair
RNF168	path_DoubleStrandRepair&DDR_gene
RNF4	path_DoubleStrandRepair&DDR_gene
RNF8	path_DoubleStrandRepair&DDR_gene
RPA1	path_DoubleStrandRepair&DDR_gene
RPA2	path_DoubleStrandRepair&DDR_gene
RPA3	path_DoubleStrandRepair&DDR_gene
RPS27A	path_DoubleStrandRepair
RTEL1	path_DoubleStrandRepair&DDR_gene
RUVBL1	path_DoubleStrandRepair&path_Chromatin_Organization&DDR_gene
SFN	path_DoubleStrandRepair
SIRT6	path_DoubleStrandRepair
SLX1A	path_DoubleStrandRepair&DDR_gene
SLX1B	path_DoubleStrandRepair&DDR_gene
SLX4	path_DoubleStrandRepair&DDR_gene
SMARCA5	path_DoubleStrandRepair&DDR_gene
SMUG1	path_DoubleStrandRepair&DDR_gene
SPIDR	path_DoubleStrandRepair
SPRTN	path_DoubleStrandRepair
SUMO1	path_DoubleStrandRepair&DDR_gene
SUMO2	path_DoubleStrandRepair&DDR_gene
SUMO3	path_DoubleStrandRepair&DDR_gene
TCEA1	path_DoubleStrandRepair&DDR_gene
TDG	path_DoubleStrandRepair&DDR_gene
TDP1	path_DoubleStrandRepair&DDR_gene
TDP2	path_DoubleStrandRepair&DDR_gene
TFPT	path_DoubleStrandRepair&DDR_gene
TIMELESS	path_DoubleStrandRepair&DDR_gene
TIPIN	path_DoubleStrandRepair&DDR_gene
TOP3A	path_DoubleStrandRepair&DDR_gene
TOPBP1	path_DoubleStrandRepair&DDR_gene
TP53	path_DoubleStrandRepair&Cancer_Predisposition&DDR_gene
TP53BP1	path_DoubleStrandRepair&DDR_gene
TRIM25	path_DoubleStrandRepair
UBA52	path_DoubleStrandRepair
UBA7	path_DoubleStrandRepair
UBB	path_DoubleStrandRepair&DDR_gene
UBC	path_DoubleStrandRepair&DDR_gene
UBE2B	path_DoubleStrandRepair&DDR_gene
UBE2I	path_DoubleStrandRepair&DDR_gene
UBE2L6	path_DoubleStrandRepair
UBE2N	path_DoubleStrandRepair&DDR_gene
UBE2T	path_DoubleStrandRepair&DDR_gene
UBE2V2	path_DoubleStrandRepair&DDR_gene
UFD1	path_DoubleStrandRepair
UIMC1	path_DoubleStrandRepair&DDR_gene
UNG	path_DoubleStrandRepair&DDR_gene
USP1	path_DoubleStrandRepair&DDR_gene
USP10	path_DoubleStrandRepair
USP43	path_DoubleStrandRepair
USP45	path_DoubleStrandRepair
USP7	path_DoubleStrandRepair
UVSSA	path_DoubleStrandRepair&DDR_gene
VCP	path_DoubleStrandRepair&DDR_gene
WEE1	path_DoubleStrandRepair&DDR_gene
WRN	path_DoubleStrandRepair&Cancer_Predisposition&DDR_gene
XAB2	path_DoubleStrandRepair&DDR_gene
XPA	path_DoubleStrandRepair&Cancer_Predisposition&DDR_gene
XPC	path_DoubleStrandRepair&Cancer_Predisposition&DDR_gene
XRCC1	path_DoubleStrandRepair&DDR_gene
XRCC2	path_DoubleStrandRepair&DDR_gene
XRCC3	path_DoubleStrandRepair&DDR_gene
XRCC4	path_DoubleStrandRepair&DDR_gene
XRCC5	path_DoubleStrandRepair&DDR_gene
XRCC6	path_DoubleStrandRepair&DDR_gene
YWHAB	path_DoubleStrandRepair
YWHAE	path_DoubleStrandRepair
YWHAG	path_DoubleStrandRepair
YWHAH	path_DoubleStrandRepair
YWHAQ	path_DoubleStrandRepair
YWHAZ	path_DoubleStrandRepair
YY1	path_DoubleStrandRepair
ZBTB32	path_DoubleStrandRepair
ZNF830	path_DoubleStrandRepair
ANO10	Coleho_Yeast
ATG2B	Coleho_Yeast
ATXN7L3	Coleho_Yeast&path_Chromatin_Organization
BIGH3	Coleho_Yeast
BTAF1	Coleho_Yeast
CDC16	Coleho_Yeast
DDHD1	Coleho_Yeast
DYNC2H1	Coleho_Yeast
DYRK1B	Coleho_Yeast
FRYL	Coleho_Yeast
GRID2IP	Coleho_Yeast
GTPBP4	Coleho_Yeast
HLTF	Coleho_Yeast&DDR_gene
HSP90AB1	Coleho_Yeast
MDN1	Coleho_Yeast
MRP17	Coleho_Yeast
MTOR	Coleho_Yeast&DDR_gene
NADSYN1	Coleho_Yeast
NFS1	Coleho_Yeast
NHP2	Coleho_Yeast&DDR_gene
NIPBL	Coleho_Yeast
NOP58	Coleho_Yeast
NUDT7	Coleho_Yeast
PCID2	Coleho_Yeast
PES1	Coleho_Yeast
PKMYT1	Coleho_Yeast
PPME1	Coleho_Yeast
PRDX2	Coleho_Yeast
RASAL2	Coleho_Yeast
RBBP6	Coleho_Yeast
RBM34	Coleho_Yeast
RHOT1	Coleho_Yeast
RPB1	Coleho_Yeast
RPC2	Coleho_Yeast
SLC38A1	Coleho_Yeast
SLC44A5	Coleho_Yeast
SMARCA4	Coleho_Yeast&path_Chromatin_Organization&Cancer_Predisposition&DDR_gene
SMYD3	Coleho_Yeast&path_Chromatin_Organization
SRP72	Coleho_Yeast
TEX261	Coleho_Yeast
TREH	Coleho_Yeast
TRIP12	Coleho_Yeast
TTC39C	Coleho_Yeast
VBP1	Coleho_Yeast
WDR46	Coleho_Yeast
ACTL6B	path_Chromatin_Organization
AEBP2	path_Chromatin_Organization
ARID1A	path_Chromatin_Organization&DDR_gene
ARID1B	path_Chromatin_Organization&DDR_gene
ARID2	path_Chromatin_Organization&DDR_gene
ARID4A	path_Chromatin_Organization
ARID4B	path_Chromatin_Organization
ARID5B	path_Chromatin_Organization
ASH1L	path_Chromatin_Organization
ASH2L	path_Chromatin_Organization
ATF2	path_Chromatin_Organization&DDR_gene
ATF7IP	path_Chromatin_Organization
ATXN7	path_Chromatin_Organization
BRD1	path_Chromatin_Organization
BRD8	path_Chromatin_Organization
BRMS1	path_Chromatin_Organization
BRPF1	path_Chromatin_Organization
BRPF3	path_Chromatin_Organization
BRWD1	path_Chromatin_Organization
CARM1	path_Chromatin_Organization
CCND1	path_Chromatin_Organization&DDR_gene
CDK4	path_Chromatin_Organization&Cancer_Predisposition&DDR_gene
CHD3	path_Chromatin_Organization
CHD4	path_Chromatin_Organization
CLOCK	path_Chromatin_Organization
COPRS	path_Chromatin_Organization
CREBBP	path_Chromatin_Organization
DMAP1	path_Chromatin_Organization
DNMT3A	path_Chromatin_Organization
DOT1L	path_Chromatin_Organization
DPY30	path_Chromatin_Organization
DR1	path_Chromatin_Organization
EED	path_Chromatin_Organization
EHMT1	path_Chromatin_Organization
EHMT2	path_Chromatin_Organization
ELP1	path_Chromatin_Organization
ELP2	path_Chromatin_Organization
ELP3	path_Chromatin_Organization
ELP4	path_Chromatin_Organization
ELP5	path_Chromatin_Organization
ELP6	path_Chromatin_Organization
ENY2	path_Chromatin_Organization
EP400	path_Chromatin_Organization
EPC1	path_Chromatin_Organization
EZH2	path_Chromatin_Organization
GATAD2A	path_Chromatin_Organization
GATAD2B	path_Chromatin_Organization
GPS2	path_Chromatin_Organization
H2AB1	path_Chromatin_Organization
H2AC1	path_Chromatin_Organization
H2AC11	path_Chromatin_Organization
H2AC12	path_Chromatin_Organization
H2AC13	path_Chromatin_Organization
H2AC14	path_Chromatin_Organization
H2AC15	path_Chromatin_Organization
H2AC16	path_Chromatin_Organization
H2AC17	path_Chromatin_Organization
H2AC18	path_Chromatin_Organization
H2AC19	path_Chromatin_Organization
H2AC20	path_Chromatin_Organization
H2AC21	path_Chromatin_Organization
H2AC4	path_Chromatin_Organization
H2AC6	path_Chromatin_Organization
H2AC7	path_Chromatin_Organization
H2AC8	path_Chromatin_Organization
H2AJ	path_Chromatin_Organization
H2AW	path_Chromatin_Organization
H2AZ1	path_Chromatin_Organization
H2AZ2	path_Chromatin_Organization
H2BC18	path_Chromatin_Organization
H3C1	path_Chromatin_Organization
H3C10	path_Chromatin_Organization
H3C11	path_Chromatin_Organization
H3C12	path_Chromatin_Organization
H3C13	path_Chromatin_Organization
H3C14	path_Chromatin_Organization
H3C15	path_Chromatin_Organization
H3C2	path_Chromatin_Organization
H3C3	path_Chromatin_Organization
H3C4	path_Chromatin_Organization
H3C6	path_Chromatin_Organization
H3C7	path_Chromatin_Organization
H3C8	path_Chromatin_Organization
HAT1	path_Chromatin_Organization
HCFC1	path_Chromatin_Organization
HDAC1	path_Chromatin_Organization
HDAC10	path_Chromatin_Organization
HDAC2	path_Chromatin_Organization
HDAC3	path_Chromatin_Organization
HDAC8	path_Chromatin_Organization
HMG20B	path_Chromatin_Organization
ING3	path_Chromatin_Organization
ING4	path_Chromatin_Organization
ING5	path_Chromatin_Organization
JADE1	path_Chromatin_Organization
JADE2	path_Chromatin_Organization
JADE3	path_Chromatin_Organization
JAK2	path_Chromatin_Organization
JMJD6	path_Chromatin_Organization
KANSL1	path_Chromatin_Organization
KANSL2	path_Chromatin_Organization
KANSL3	path_Chromatin_Organization
KAT14	path_Chromatin_Organization
KAT2A	path_Chromatin_Organization&DDR_gene
KAT2B	path_Chromatin_Organization
KAT6A	path_Chromatin_Organization
KAT6B	path_Chromatin_Organization
KAT7	path_Chromatin_Organization
KAT8	path_Chromatin_Organization
KDM1A	path_Chromatin_Organization
KDM1B	path_Chromatin_Organization
KDM2A	path_Chromatin_Organization
KDM2B	path_Chromatin_Organization
KDM3A	path_Chromatin_Organization
KDM3B	path_Chromatin_Organization
KDM4C	path_Chromatin_Organization
KDM4D	path_Chromatin_Organization
KDM5A	path_Chromatin_Organization
KDM5B	path_Chromatin_Organization
KDM5C	path_Chromatin_Organization
KDM5D	path_Chromatin_Organization
KDM6A	path_Chromatin_Organization
KDM6B	path_Chromatin_Organization
KDM7A	path_Chromatin_Organization
KDM8	path_Chromatin_Organization
KMT2A	path_Chromatin_Organization
KMT2B	path_Chromatin_Organization
KMT2C	path_Chromatin_Organization
KMT2D	path_Chromatin_Organization
KMT2E	path_Chromatin_Organization
KMT5A	path_Chromatin_Organization
KMT5B	path_Chromatin_Organization
KMT5C	path_Chromatin_Organization
MBD3	path_Chromatin_Organization
MBIP	path_Chromatin_Organization
MEAF6	path_Chromatin_Organization
MECOM	path_Chromatin_Organization
MIR555	path_Chromatin_Organization
MIR6755	path_Chromatin_Organization
MIR7107	path_Chromatin_Organization
MORF4L1	path_Chromatin_Organization
MORF4L2	path_Chromatin_Organization
MRGBP	path_Chromatin_Organization
MSL1	path_Chromatin_Organization
MSL2	path_Chromatin_Organization
MSL3	path_Chromatin_Organization
MTA1	path_Chromatin_Organization
MTA2	path_Chromatin_Organization
MTA3	path_Chromatin_Organization
NCOA1	path_Chromatin_Organization
NCOA2	path_Chromatin_Organization
NCOR1	path_Chromatin_Organization
NCOR2	path_Chromatin_Organization
NFKB1	path_Chromatin_Organization
NFKB2	path_Chromatin_Organization
NSD1	path_Chromatin_Organization
NSD3	path_Chromatin_Organization
OGT	path_Chromatin_Organization
PADI1	path_Chromatin_Organization
PADI2	path_Chromatin_Organization
PADI3	path_Chromatin_Organization
PADI4	path_Chromatin_Organization
PADI6	path_Chromatin_Organization
PAX3	path_Chromatin_Organization
PBRM1	path_Chromatin_Organization&DDR_gene
PHF2	path_Chromatin_Organization
PHF20	path_Chromatin_Organization
PHF21A	path_Chromatin_Organization
PHF8	path_Chromatin_Organization
PRDM16	path_Chromatin_Organization
PRDM9	path_Chromatin_Organization
PRMT1	path_Chromatin_Organization
PRMT3	path_Chromatin_Organization
PRMT5	path_Chromatin_Organization
PRMT6	path_Chromatin_Organization&DDR_gene
PRMT7	path_Chromatin_Organization
RBBP4	path_Chromatin_Organization
RBBP5	path_Chromatin_Organization
RBBP7	path_Chromatin_Organization
RCOR1	path_Chromatin_Organization
RELA	path_Chromatin_Organization
REST	path_Chromatin_Organization
RIOX2	path_Chromatin_Organization
RPS2	path_Chromatin_Organization
RUVBL2	path_Chromatin_Organization&DDR_gene
SAP130	path_Chromatin_Organization
SAP18	path_Chromatin_Organization
SAP30	path_Chromatin_Organization
SAP30L	path_Chromatin_Organization
SETD1A	path_Chromatin_Organization
SETD1B	path_Chromatin_Organization
SETD2	path_Chromatin_Organization
SETD3	path_Chromatin_Organization
SETD6	path_Chromatin_Organization
SETD7	path_Chromatin_Organization
SETDB1	path_Chromatin_Organization
SETDB2	path_Chromatin_Organization
SGF29	path_Chromatin_Organization
SMARCA2	path_Chromatin_Organization&DDR_gene
SMARCB1	path_Chromatin_Organization&Cancer_Predisposition&DDR_gene
SMARCC1	path_Chromatin_Organization&DDR_gene
SMARCC2	path_Chromatin_Organization&DDR_gene
SMARCD1	path_Chromatin_Organization&DDR_gene
SMARCD2	path_Chromatin_Organization
SMARCD3	path_Chromatin_Organization
SMARCE1	path_Chromatin_Organization&Cancer_Predisposition&DDR_gene
SMYD2	path_Chromatin_Organization
SUDS3	path_Chromatin_Organization
SUPT20H	path_Chromatin_Organization
SUPT3H	path_Chromatin_Organization
SUPT7L	path_Chromatin_Organization
SUV39H1	path_Chromatin_Organization
SUV39H2	path_Chromatin_Organization
SUZ12	path_Chromatin_Organization
TADA1	path_Chromatin_Organization
TADA2A	path_Chromatin_Organization
TADA2B	path_Chromatin_Organization
TADA3	path_Chromatin_Organization&DDR_gene
TAF10	path_Chromatin_Organization
TAF12	path_Chromatin_Organization
TAF5L	path_Chromatin_Organization
TAF6L	path_Chromatin_Organization
TAF9	path_Chromatin_Organization
TBL1X	path_Chromatin_Organization
TBL1XR1	path_Chromatin_Organization
TRRAP	path_Chromatin_Organization
USP22	path_Chromatin_Organization
UTY	path_Chromatin_Organization
VPS72	path_Chromatin_Organization
WDR5	path_Chromatin_Organization
WDR77	path_Chromatin_Organization
YEATS2	path_Chromatin_Organization
YEATS4	path_Chromatin_Organization
ZZZ3	path_Chromatin_Organization
ABCB11	Cancer_Predisposition
ALK	Cancer_Predisposition
APC	Cancer_Predisposition
AXIN2	Cancer_Predisposition
BMPR1A	Cancer_Predisposition
BUB1B	Cancer_Predisposition
CBL	Cancer_Predisposition
CDC73	Cancer_Predisposition
CDH1	Cancer_Predisposition
CDKN1B	Cancer_Predisposition
CDKN2A	Cancer_Predisposition&DDR_gene
CEBPA	Cancer_Predisposition
COL7A1	Cancer_Predisposition
CYLD	Cancer_Predisposition
DICER1	Cancer_Predisposition
DIS3L2	Cancer_Predisposition
DKC1	Cancer_Predisposition&DDR_gene
DOCK8	Cancer_Predisposition
EGFR	Cancer_Predisposition
ELANE	Cancer_Predisposition
EXT1	Cancer_Predisposition
EXT2	Cancer_Predisposition
FAH	Cancer_Predisposition
FH	Cancer_Predisposition
FLCN	Cancer_Predisposition
GATA2	Cancer_Predisposition
GBA	Cancer_Predisposition
GJB2	Cancer_Predisposition
GPC3	Cancer_Predisposition
HFE	Cancer_Predisposition
HMBS	Cancer_Predisposition
HRAS	Cancer_Predisposition
ITK	Cancer_Predisposition
KIT	Cancer_Predisposition
MAX	Cancer_Predisposition
MEN1	Cancer_Predisposition&DDR_gene
MET	Cancer_Predisposition
MTAP	Cancer_Predisposition
NF1	Cancer_Predisposition
NF2	Cancer_Predisposition
PDGFRA	Cancer_Predisposition
PHOX2B	Cancer_Predisposition
PRKAR1A	Cancer_Predisposition
PRSS1	Cancer_Predisposition
PTCH1	Cancer_Predisposition
PTEN	Cancer_Predisposition
PTPN11	Cancer_Predisposition
RB1	Cancer_Predisposition
RECQL4	Cancer_Predisposition&DDR_gene
RET	Cancer_Predisposition
RHBDF2	Cancer_Predisposition
RMRP	Cancer_Predisposition
RUNX1	Cancer_Predisposition
SBDS	Cancer_Predisposition
SDHA	Cancer_Predisposition
SDHAF2	Cancer_Predisposition
SDHB	Cancer_Predisposition
SDHC	Cancer_Predisposition
SDHD	Cancer_Predisposition
SERPINA1	Cancer_Predisposition
SH2D1A	Cancer_Predisposition
SLC25A13	Cancer_Predisposition
SMAD4	Cancer_Predisposition
SOS1	Cancer_Predisposition
SRY	Cancer_Predisposition
STAT3	Cancer_Predisposition
STK11	Cancer_Predisposition
SUFU	Cancer_Predisposition
TERT	Cancer_Predisposition&DDR_gene
TGFBR1	Cancer_Predisposition
TMEM127	Cancer_Predisposition
TNFRSF6	Cancer_Predisposition
TRIM37	Cancer_Predisposition
TSC1	Cancer_Predisposition
TSC2	Cancer_Predisposition
UROD	Cancer_Predisposition
VHL	Cancer_Predisposition
WAS	Cancer_Predisposition
WT1	Cancer_Predisposition
FRAP1	MSH2_stability
HERC1	MSH2_stability
PIK3C2B	MSH2_stability
PRKCZ	MSH2_stability
ACD	DDR_gene
ALKBH1	DDR_gene
AMN1	DDR_gene
ANKRD28	DDR_gene
ANKRD44	DDR_gene
ANKRD52	DDR_gene
APEX2	DDR_gene
APITD1	DDR_gene
APLF	DDR_gene
APTX	DDR_gene
ASF1A	DDR_gene
ASF1B	DDR_gene
ATRX	DDR_gene
ATXN3	DDR_gene
BAZ1A	DDR_gene
BCAS2	DDR_gene
BRD7	DDR_gene
BRE	DDR_gene
BTG2	DDR_gene
CCDC98	DDR_gene
CCNB2	DDR_gene
CCNB3	DDR_gene
CCNC	DDR_gene
CCND2	DDR_gene
CCND3	DDR_gene
CCNE1	DDR_gene
CCNO	DDR_gene
CDC25A	DDR_gene
CDC25B	DDR_gene
CDC5L	DDR_gene
CDKN1A	DDR_gene
CDKN2D	DDR_gene
CHAF1A	DDR_gene
CHRAC1	DDR_gene
CIB1	DDR_gene
CLK2	DDR_gene
CNOT7	DDR_gene
CRY1	DDR_gene
CRY2	DDR_gene
CSNK1D	DDR_gene
CSNK1E	DDR_gene
CTC1	DDR_gene
CUL3	DDR_gene
CUL5	DDR_gene
DAXX	DDR_gene
DDX11	DDR_gene
DLGAP5	DDR_gene
DMC1	DDR_gene
DNMT1	DDR_gene
DUT	DDR_gene
EID3	DDR_gene
FAM175A	DDR_gene
FBXO18	DDR_gene
GADD45A	DDR_gene
GADD45G	DDR_gene
GAR1	DDR_gene
H2AFX	DDR_gene
H2AFZ	DDR_gene
HELQ	DDR_gene
HES1	DDR_gene
HFM1	DDR_gene
HINFP	DDR_gene
HMGB1	DDR_gene
HMGB2	DDR_gene
HUS1B	DDR_gene
IGHMBP2	DDR_gene
IP6K3	DDR_gene
MDM2	DDR_gene
MDM4	DDR_gene
MLH3	DDR_gene
MMS19	DDR_gene
MMS22L	DDR_gene
MPLKIP	DDR_gene
MRE11A	DDR_gene
MSH4	DDR_gene
MSH5	DDR_gene
MVP	DDR_gene
MYBBP1A	DDR_gene
NABP1	DDR_gene
NABP2	DDR_gene
NCAPD2	DDR_gene
NCAPD3	DDR_gene
NCAPG	DDR_gene
NCAPG2	DDR_gene
NCAPH	DDR_gene
NCAPH2	DDR_gene
NDNL2	DDR_gene
NEIL3	DDR_gene
NFATC2IP	DDR_gene
NOP10	DDR_gene
NPM1	DDR_gene
NSMCE1	DDR_gene
NSMCE2	DDR_gene
NSMCE4A	DDR_gene
NUDT1	DDR_gene
OBFC1	DDR_gene
OBFC2B	DDR_gene
PAPD7	DDR_gene
PARP3	DDR_gene
PARP4	DDR_gene
PARPBP	DDR_gene
PDS5A	DDR_gene
PDS5B	DDR_gene
PER1	DDR_gene
PER2	DDR_gene
PER3	DDR_gene
PIAS2	DDR_gene
PIF1	DDR_gene
PINX1	DDR_gene
PLRG1	DDR_gene
PMS1	DDR_gene
PMS2P5	DDR_gene
POLA1	DDR_gene
POLG	DDR_gene
POLG2	DDR_gene
POLS	DDR_gene
POT1	DDR_gene
PPP4R1	DDR_gene
PPP4R4	DDR_gene
PPP6C	DDR_gene
PPP6R1	DDR_gene
PPP6R2	DDR_gene
PPP6R3	DDR_gene
PRKCG	DDR_gene
RAD21	DDR_gene
RAD54B	DDR_gene
RAD54L	DDR_gene
RASSF7	DDR_gene
RDM1	DDR_gene
RECQL	DDR_gene
RECQL5	DDR_gene
RPA4	DDR_gene
RPAIN	DDR_gene
RPS27L	DDR_gene
RRM1	DDR_gene
RRM2	DDR_gene
RRM2B	DDR_gene
SETMAR	DDR_gene
SETX	DDR_gene
SFR1	DDR_gene
SHFM1	DDR_gene
SHPRH	DDR_gene
SIRT1	DDR_gene
SMARCAD1	DDR_gene
SMARCAL1	DDR_gene
SMC1A	DDR_gene
SMC1B	DDR_gene
SMC2	DDR_gene
SMC3	DDR_gene
SMC4	DDR_gene
SMC5	DDR_gene
SMC6	DDR_gene
SMEK2	DDR_gene
SMG6	DDR_gene
SOD1	DDR_gene
SPO11	DDR_gene
STAG1	DDR_gene
STAG2	DDR_gene
STRA13	DDR_gene
SUMO4	DDR_gene
SWI5	DDR_gene
TCEB1	DDR_gene
TCEB2	DDR_gene
TCEB3	DDR_gene
TELO2	DDR_gene
TEN1	DDR_gene
TEP1	DDR_gene
TERF1	DDR_gene
TERF2	DDR_gene
TERF2IP	DDR_gene
TINF2	DDR_gene
TNKS	DDR_gene
TNP1	DDR_gene
TONSL	DDR_gene
TOP1	DDR_gene
TOP2A	DDR_gene
TOP2B	DDR_gene
TOP3B	DDR_gene
TP73	DDR_gene
TREX1	DDR_gene
TREX2	DDR_gene
TRIM28	DDR_gene
TRIP13	DDR_gene
TTI1	DDR_gene
TTI2	DDR_gene
TYMS	DDR_gene
UBA1	DDR_gene
UBA2	DDR_gene
UBD	DDR_gene
UBE2A	DDR_gene
UBE2NL	DDR_gene
UBE2V1	DDR_gene
UPF1	DDR_gene
UVRAG	DDR_gene
WDR48	DDR_gene
WRAP53	DDR_gene
XRCC6BP1	DDR_gene
YBX1	DDR_gene
ZRANB3	DDR_gene
ZSWIM7	DDR_gene

## Sheet: Supplementary Dataset 2
Supplementary Dataset 2		List of genes replicating at a FDR of 1 %.
gene	pheno	cancer_type	model	variants	variant_pheno_cancer_type_snp_model	variant_pheno_cancer_type	variant_cancer_type	TCGA	WGS
SETD1A	IC3	Breast	additive	Misssense_MTR	SETD1A__IC3__Breast__Misssense_MTR__additive	SETD1A__IC3__Breast	SETD1A__Breast	1.85670058868802	1.59009516224601
HERC2	IC13	Ovary	additive	Misssense_MTR	HERC2__IC13__Ovary__Misssense_MTR__additive	HERC2__IC13__Ovary	HERC2__Ovary	1.23889877400464	2.40249975452106
ACTL6A	IC8	Pancan	additive	Misssense_MTR	ACTL6A__IC8__Pancan__Misssense_MTR__additive	ACTL6A__IC8__Pancan	ACTL6A__Pancan	-0.625787910444244	-1.313296695093
NCAPG2	IC9	Pancan	additive	Misssense_MTR	NCAPG2__IC9__Pancan__Misssense_MTR__additive	NCAPG2__IC9__Pancan	NCAPG2__Pancan	0.752079001316234	0.862632590361967
SETD1A	VAE_depth1_13	Breast	additive	Misssense_MTR	SETD1A__VAE_depth1_13__Breast__Misssense_MTR__additive	SETD1A__VAE_depth1_13__Breast	SETD1A__Breast	4.63446174005574	3.71333862706767
MSH2	VAE_depth1_13	Pancan	additive	Misssense_MTR	MSH2__VAE_depth1_13__Pancan__Misssense_MTR__additive	MSH2__VAE_depth1_13__Pancan	MSH2__Pancan	2.95353142364505	2.25255241128457
HMG20B	VAE_depth1_2	Pancan	additive	Misssense_MTR	HMG20B__VAE_depth1_2__Pancan__Misssense_MTR__additive	HMG20B__VAE_depth1_2__Pancan	HMG20B__Pancan	3.43291223743731	2.26753386536022
BRCA1	IC2	Breast	additive	PTV	BRCA1__IC2__Breast__PTV__additive	BRCA1__IC2__Breast	BRCA1__Breast	0.589201933846356	0.803843911610501
BRCA2	IC4	Breast	additive	PTV	BRCA2__IC4__Breast__PTV__additive	BRCA2__IC4__Breast	BRCA2__Breast	1.57705969930129	1.54451789906302
BRCA1	IC2	Pancan	additive	PTV	BRCA1__IC2__Pancan__PTV__additive	BRCA1__IC2__Pancan	BRCA1__Pancan	0.227628079122112	0.452464609863867
MLH1	IC3	Pancan	additive	PTV	MLH1__IC3__Pancan__PTV__additive	MLH1__IC3__Pancan	MLH1__Pancan	2.99968038899463	2.09068938479418
MSH2	IC3	Pancan	additive	PTV	MSH2__IC3__Pancan__PTV__additive	MSH2__IC3__Pancan	MSH2__Pancan	2.06588848953466	0.880252434083853
APEX1	IC4	Pancan	additive	PTV	APEX1__IC4__Pancan__PTV__additive	APEX1__IC4__Pancan	APEX1__Pancan	1.09672547185671	1.06738176362473
BRCA1	IC4	Pancan	additive	PTV	BRCA1__IC4__Pancan__PTV__additive	BRCA1__IC4__Pancan	BRCA1__Pancan	0.554814058574975	1.08026780555225
BRCA2	IC4	Pancan	additive	PTV	BRCA2__IC4__Pancan__PTV__additive	BRCA2__IC4__Pancan	BRCA2__Pancan	1.24268500527465	1.31270134932764
PALB2	IC4	Pancan	additive	PTV	PALB2__IC4__Pancan__PTV__additive	PALB2__IC4__Pancan	PALB2__Pancan	1.62239741760975	1.47248484786813
BRCA2	VAE_depth1_6	Breast	additive	PTV	BRCA2__VAE_depth1_6__Breast__PTV__additive	BRCA2__VAE_depth1_6__Breast	BRCA2__Breast	3.75920587078846	3.14434579279118
BRCA2	VAE_depth1_8	Breast	additive	PTV	BRCA2__VAE_depth1_8__Breast__PTV__additive	BRCA2__VAE_depth1_8__Breast	BRCA2__Breast	4.79126842364104	3.93606574134636
MLH1	VAE_depth1_10	Pancan	additive	PTV	MLH1__VAE_depth1_10__Pancan__PTV__additive	MLH1__VAE_depth1_10__Pancan	MLH1__Pancan	5.56143329976577	3.17272569878942
MLH1	VAE_depth1_13	Pancan	additive	PTV	MLH1__VAE_depth1_13__Pancan__PTV__additive	MLH1__VAE_depth1_13__Pancan	MLH1__Pancan	8.15498886396971	7.09885740788721
MSH2	VAE_depth1_13	Pancan	additive	PTV	MSH2__VAE_depth1_13__Pancan__PTV__additive	MSH2__VAE_depth1_13__Pancan	MSH2__Pancan	6.46462107468188	3.5746839635975
BRCA1	VAE_depth1_6	Pancan	additive	PTV	BRCA1__VAE_depth1_6__Pancan__PTV__additive	BRCA1__VAE_depth1_6__Pancan	BRCA1__Pancan	1.99384946045027	1.66195896713963
BRCA2	VAE_depth1_6	Pancan	additive	PTV	BRCA2__VAE_depth1_6__Pancan__PTV__additive	BRCA2__VAE_depth1_6__Pancan	BRCA2__Pancan	3.02676235381769	2.4233068398801
PALB2	VAE_depth1_6	Pancan	additive	PTV	PALB2__VAE_depth1_6__Pancan__PTV__additive	PALB2__VAE_depth1_6__Pancan	PALB2__Pancan	3.69797531868126	2.31859002605273
BRCA1	VAE_depth1_8	Pancan	additive	PTV	BRCA1__VAE_depth1_8__Pancan__PTV__additive	BRCA1__VAE_depth1_8__Pancan	BRCA1__Pancan	1.54989369378248	3.54652733666516
BRCA2	VAE_depth1_8	Pancan	additive	PTV	BRCA2__VAE_depth1_8__Pancan__PTV__additive	BRCA2__VAE_depth1_8__Pancan	BRCA2__Pancan	3.92172357957412	3.36179707630405
PALB2	VAE_depth1_8	Pancan	additive	PTV	PALB2__VAE_depth1_8__Pancan__PTV__additive	PALB2__VAE_depth1_8__Pancan	PALB2__Pancan	4.72609629018406	4.03470159870845
CHD3	IC13	Bladder	additive	PTV_Misssense_CADD15	CHD3__IC13__Bladder__PTV_Misssense_CADD15__additive	CHD3__IC13__Bladder	CHD3__Bladder	1.21572938189794	0.46005482512469
PER1	IC12	Breast	additive	PTV_Misssense_CADD15	PER1__IC12__Breast__PTV_Misssense_CADD15__additive	PER1__IC12__Breast	PER1__Breast	0.144300920615359	0.114334757461932
BRCA1	IC2	Breast	additive	PTV_Misssense_CADD15	BRCA1__IC2__Breast__PTV_Misssense_CADD15__additive	BRCA1__IC2__Breast	BRCA1__Breast	0.390644153671979	0.373224894075988
SETD1A	IC3	Breast	additive	PTV_Misssense_CADD15	SETD1A__IC3__Breast__PTV_Misssense_CADD15__additive	SETD1A__IC3__Breast	SETD1A__Breast	0.540445626901936	0.210326791748615
BRCA2	IC4	Breast	additive	PTV_Misssense_CADD15	BRCA2__IC4__Breast__PTV_Misssense_CADD15__additive	BRCA2__IC4__Breast	BRCA2__Breast	1.05233326872526	1.30764885402426
MDN1	IC3	Brain_glioma_multi	additive	PTV_Misssense_CADD15	MDN1__IC3__Brain_glioma_multi__PTV_Misssense_CADD15__additive	MDN1__IC3__Brain_glioma_multi	MDN1__Brain_glioma_multi	0.413228934253768	0.281952356517495
PIK3C2B	IC13	Lung_sq	additive	PTV_Misssense_CADD15	PIK3C2B__IC13__Lung_sq__PTV_Misssense_CADD15__additive	PIK3C2B__IC13__Lung_sq	PIK3C2B__Lung_sq	0.753270927699884	2.14633379347451
TRRAP	IC3	Ovary	additive	PTV_Misssense_CADD15	TRRAP__IC3__Ovary__PTV_Misssense_CADD15__additive	TRRAP__IC3__Ovary	TRRAP__Ovary	0.177102658119962	0.293815098319282
MSH3	IC13	Pancan	additive	PTV_Misssense_CADD15	MSH3__IC13__Pancan__PTV_Misssense_CADD15__additive	MSH3__IC13__Pancan	MSH3__Pancan	0.36943863352285	0.245093794998228
RBBP5	IC13	Pancan	additive	PTV_Misssense_CADD15	RBBP5__IC13__Pancan__PTV_Misssense_CADD15__additive	RBBP5__IC13__Pancan	RBBP5__Pancan	0.718990233594492	1.00132590582791
BRCA1	IC2	Pancan	additive	PTV_Misssense_CADD15	BRCA1__IC2__Pancan__PTV_Misssense_CADD15__additive	BRCA1__IC2__Pancan	BRCA1__Pancan	0.0894539828234151	0.222957065043759
BRCA1	IC4	Pancan	additive	PTV_Misssense_CADD15	BRCA1__IC4__Pancan__PTV_Misssense_CADD15__additive	BRCA1__IC4__Pancan	BRCA1__Pancan	0.536503609829092	0.543681308490807
BRCA2	IC4	Pancan	additive	PTV_Misssense_CADD15	BRCA2__IC4__Pancan__PTV_Misssense_CADD15__additive	BRCA2__IC4__Pancan	BRCA2__Pancan	0.525985606409633	0.8908622465896
PALB2	IC4	Pancan	additive	PTV_Misssense_CADD15	PALB2__IC4__Pancan__PTV_Misssense_CADD15__additive	PALB2__IC4__Pancan	PALB2__Pancan	0.570676190039155	0.563314208597724
MTOR	IC3	Prostate	additive	PTV_Misssense_CADD15	MTOR__IC3__Prostate__PTV_Misssense_CADD15__additive	MTOR__IC3__Prostate	MTOR__Prostate	0.610564595007632	0.484349251676144
TTI2	IC3	Prostate	additive	PTV_Misssense_CADD15	TTI2__IC3__Prostate__PTV_Misssense_CADD15__additive	TTI2__IC3__Prostate	TTI2__Prostate	1.1696008062683	2.08214259153797
BRCA2	VAE_depth1_6	Breast	additive	PTV_Misssense_CADD15	BRCA2__VAE_depth1_6__Breast__PTV_Misssense_CADD15__additive	BRCA2__VAE_depth1_6__Breast	BRCA2__Breast	2.2638767078137	2.57010747967012
BRCA2	VAE_depth1_8	Breast	additive	PTV_Misssense_CADD15	BRCA2__VAE_depth1_8__Breast__PTV_Misssense_CADD15__additive	BRCA2__VAE_depth1_8__Breast	BRCA2__Breast	3.45910357857824	3.52377256211766
KANSL1	VAE_depth1_13	Lung_ad	additive	PTV_Misssense_CADD15	KANSL1__VAE_depth1_13__Lung_ad__PTV_Misssense_CADD15__additive	KANSL1__VAE_depth1_13__Lung_ad	KANSL1__Lung_ad	0.975994867360565	1.61203193311762
BRCA1	VAE_depth1_6	Pancan	additive	PTV_Misssense_CADD15	BRCA1__VAE_depth1_6__Pancan__PTV_Misssense_CADD15__additive	BRCA1__VAE_depth1_6__Pancan	BRCA1__Pancan	1.62454148084554	0.931517252260994
BRCA2	VAE_depth1_6	Pancan	additive	PTV_Misssense_CADD15	BRCA2__VAE_depth1_6__Pancan__PTV_Misssense_CADD15__additive	BRCA2__VAE_depth1_6__Pancan	BRCA2__Pancan	1.06510902030284	1.51994322662246
BRCA1	VAE_depth1_8	Pancan	additive	PTV_Misssense_CADD15	BRCA1__VAE_depth1_8__Pancan__PTV_Misssense_CADD15__additive	BRCA1__VAE_depth1_8__Pancan	BRCA1__Pancan	1.5177386920626	1.80951609952689
BRCA2	VAE_depth1_8	Pancan	additive	PTV_Misssense_CADD15	BRCA2__VAE_depth1_8__Pancan__PTV_Misssense_CADD15__additive	BRCA2__VAE_depth1_8__Pancan	BRCA2__Pancan	1.6566633232668	2.42764751248111
PALB2	VAE_depth1_8	Pancan	additive	PTV_Misssense_CADD15	PALB2__VAE_depth1_8__Pancan__PTV_Misssense_CADD15__additive	PALB2__VAE_depth1_8__Pancan	PALB2__Pancan	1.51095632137703	1.53236730045256
MTOR	VAE_depth1_13	Prostate	additive	PTV_Misssense_CADD15	MTOR__VAE_depth1_13__Prostate__PTV_Misssense_CADD15__additive	MTOR__VAE_depth1_13__Prostate	MTOR__Prostate	2.50130108521933	1.70892928954411
EXO1	VAE_depth1_10	Skin	additive	PTV_Misssense_CADD15	EXO1__VAE_depth1_10__Skin__PTV_Misssense_CADD15__additive	EXO1__VAE_depth1_10__Skin	EXO1__Skin	1.61050569010332	1.93125931451785
TP53BP1	VAE_depth1_1	Skin	additive	PTV_Misssense_CADD15	TP53BP1__VAE_depth1_1__Skin__PTV_Misssense_CADD15__additive	TP53BP1__VAE_depth1_1__Skin	TP53BP1__Skin	0.659555025483416	1.31532006752808
EXO1	VAE_depth1_6	Skin	additive	PTV_Misssense_CADD15	EXO1__VAE_depth1_6__Skin__PTV_Misssense_CADD15__additive	EXO1__VAE_depth1_6__Skin	EXO1__Skin	3.02450529671622	1.69786201156163
PAXIP1	VAE_depth1_6	Skin	additive	PTV_Misssense_CADD15	PAXIP1__VAE_depth1_6__Skin__PTV_Misssense_CADD15__additive	PAXIP1__VAE_depth1_6__Skin	PAXIP1__Skin	1.34072116622562	1.87964560682305
RIF1	VAE_depth1_6	Skin	additive	PTV_Misssense_CADD15	RIF1__VAE_depth1_6__Skin__PTV_Misssense_CADD15__additive	RIF1__VAE_depth1_6__Skin	RIF1__Skin	0.915552392205968	0.678896499287049
BRCA1	IC2	Breast	additive	PTV_Misssense_CADD25	BRCA1__IC2__Breast__PTV_Misssense_CADD25__additive	BRCA1__IC2__Breast	BRCA1__Breast	0.558271137319677	0.792373400095639
BRCA1	IC4	Breast	additive	PTV_Misssense_CADD25	BRCA1__IC4__Breast__PTV_Misssense_CADD25__additive	BRCA1__IC4__Breast	BRCA1__Breast	0.914688083655651	1.15559188026496
BRCA2	IC4	Breast	additive	PTV_Misssense_CADD25	BRCA2__IC4__Breast__PTV_Misssense_CADD25__additive	BRCA2__IC4__Breast	BRCA2__Breast	1.33260145032572	1.5578219610937
SMC1B	IC13	Pancan	additive	PTV_Misssense_CADD25	SMC1B__IC13__Pancan__PTV_Misssense_CADD25__additive	SMC1B__IC13__Pancan	SMC1B__Pancan	0.31163443056982	0.493978139378377
APC	IC14	Pancan	additive	PTV_Misssense_CADD25	APC__IC14__Pancan__PTV_Misssense_CADD25__additive	APC__IC14__Pancan	APC__Pancan	-0.0457627246029985	-0.361315785392607
BRCA1	IC2	Pancan	additive	PTV_Misssense_CADD25	BRCA1__IC2__Pancan__PTV_Misssense_CADD25__additive	BRCA1__IC2__Pancan	BRCA1__Pancan	0.300106617715846	0.360946885001304
MLH1	IC3	Pancan	additive	PTV_Misssense_CADD25	MLH1__IC3__Pancan__PTV_Misssense_CADD25__additive	MLH1__IC3__Pancan	MLH1__Pancan	0.303913321136621	0.849185927796655
BRCA1	IC4	Pancan	additive	PTV_Misssense_CADD25	BRCA1__IC4__Pancan__PTV_Misssense_CADD25__additive	BRCA1__IC4__Pancan	BRCA1__Pancan	0.650386894669093	0.983140411509353
BRCA2	IC4	Pancan	additive	PTV_Misssense_CADD25	BRCA2__IC4__Pancan__PTV_Misssense_CADD25__additive	BRCA2__IC4__Pancan	BRCA2__Pancan	0.877391003212099	1.18484794978755
PALB2	IC4	Pancan	additive	PTV_Misssense_CADD25	PALB2__IC4__Pancan__PTV_Misssense_CADD25__additive	PALB2__IC4__Pancan	PALB2__Pancan	0.826355808741702	1.35802056149997
BRCA2	IC8	Pancan	additive	PTV_Misssense_CADD25	BRCA2__IC8__Pancan__PTV_Misssense_CADD25__additive	BRCA2__IC8__Pancan	BRCA2__Pancan	-0.0657177735218786	-0.377421763825805
EYA2	IC4	Prostate	additive	PTV_Misssense_CADD25	EYA2__IC4__Prostate__PTV_Misssense_CADD25__additive	EYA2__IC4__Prostate	EYA2__Prostate	1.12179834539369	1.60888290211192
BRCA2	VAE_depth1_6	Breast	additive	PTV_Misssense_CADD25	BRCA2__VAE_depth1_6__Breast__PTV_Misssense_CADD25__additive	BRCA2__VAE_depth1_6__Breast	BRCA2__Breast	3.25053281407073	3.05937706400878
BRCA2	VAE_depth1_8	Breast	additive	PTV_Misssense_CADD25	BRCA2__VAE_depth1_8__Breast__PTV_Misssense_CADD25__additive	BRCA2__VAE_depth1_8__Breast	BRCA2__Breast	4.20414745038349	4.03703921404635
NCAPD2	VAE_depth1_1	Colon_Rectum	additive	PTV_Misssense_CADD25	NCAPD2__VAE_depth1_1__Colon_Rectum__PTV_Misssense_CADD25__additive	NCAPD2__VAE_depth1_1__Colon_Rectum	NCAPD2__Colon_Rectum	2.59052103082849	0.898824743406756
MSH2	VAE_depth1_13	Pancan	additive	PTV_Misssense_CADD25	MSH2__VAE_depth1_13__Pancan__PTV_Misssense_CADD25__additive	MSH2__VAE_depth1_13__Pancan	MSH2__Pancan	2.75744964813912	1.48657503860029
BRCA1	VAE_depth1_6	Pancan	additive	PTV_Misssense_CADD25	BRCA1__VAE_depth1_6__Pancan__PTV_Misssense_CADD25__additive	BRCA1__VAE_depth1_6__Pancan	BRCA1__Pancan	2.0772249565009	1.58455487231484
BRCA2	VAE_depth1_6	Pancan	additive	PTV_Misssense_CADD25	BRCA2__VAE_depth1_6__Pancan__PTV_Misssense_CADD25__additive	BRCA2__VAE_depth1_6__Pancan	BRCA2__Pancan	2.12956196163085	2.17828575815064
PALB2	VAE_depth1_6	Pancan	additive	PTV_Misssense_CADD25	PALB2__VAE_depth1_6__Pancan__PTV_Misssense_CADD25__additive	PALB2__VAE_depth1_6__Pancan	PALB2__Pancan	1.83500610725609	2.1228934782415
BRCA1	VAE_depth1_8	Pancan	additive	PTV_Misssense_CADD25	BRCA1__VAE_depth1_8__Pancan__PTV_Misssense_CADD25__additive	BRCA1__VAE_depth1_8__Pancan	BRCA1__Pancan	1.68581340017325	3.23795016478981
BRCA2	VAE_depth1_8	Pancan	additive	PTV_Misssense_CADD25	BRCA2__VAE_depth1_8__Pancan__PTV_Misssense_CADD25__additive	BRCA2__VAE_depth1_8__Pancan	BRCA2__Pancan	2.72884769990359	3.07049824760338
PALB2	VAE_depth1_8	Pancan	additive	PTV_Misssense_CADD25	PALB2__VAE_depth1_8__Pancan__PTV_Misssense_CADD25__additive	PALB2__VAE_depth1_8__Pancan	PALB2__Pancan	2.36638693085748	3.7832568300471
EXO1	VAE_depth1_10	Skin	additive	PTV_Misssense_CADD25	EXO1__VAE_depth1_10__Skin__PTV_Misssense_CADD25__additive	EXO1__VAE_depth1_10__Skin	EXO1__Skin	2.23919683963199	3.3617392742016
EXO1	VAE_depth1_6	Skin	additive	PTV_Misssense_CADD25	EXO1__VAE_depth1_6__Skin__PTV_Misssense_CADD25__additive	EXO1__VAE_depth1_6__Skin	EXO1__Skin	4.08443203897525	2.95501777397377
SETD1A	IC3	Breast	dominant	Misssense_MTR	SETD1A__IC3__Breast__Misssense_MTR__dominant	SETD1A__IC3__Breast	SETD1A__Breast	1.85670058868802	1.59009516224601
HERC2	IC13	Ovary	dominant	Misssense_MTR	HERC2__IC13__Ovary__Misssense_MTR__dominant	HERC2__IC13__Ovary	HERC2__Ovary	1.17818232377352	2.40249975452106
RECQL	IC4	Pancan	dominant	Misssense_MTR	RECQL__IC4__Pancan__Misssense_MTR__dominant	RECQL__IC4__Pancan	RECQL__Pancan	0.30337625713895	0.721525207022183
ACTL6A	IC8	Pancan	dominant	Misssense_MTR	ACTL6A__IC8__Pancan__Misssense_MTR__dominant	ACTL6A__IC8__Pancan	ACTL6A__Pancan	-0.625787910444244	-1.313296695093
TOP2A	IC8	Pancan	dominant	Misssense_MTR	TOP2A__IC8__Pancan__Misssense_MTR__dominant	TOP2A__IC8__Pancan	TOP2A__Pancan	-0.971384212645418	-1.24152998276578
NCAPG2	IC9	Pancan	dominant	Misssense_MTR	NCAPG2__IC9__Pancan__Misssense_MTR__dominant	NCAPG2__IC9__Pancan	NCAPG2__Pancan	0.752079001316234	0.862632590361967
SETD1A	VAE_depth1_13	Breast	dominant	Misssense_MTR	SETD1A__VAE_depth1_13__Breast__Misssense_MTR__dominant	SETD1A__VAE_depth1_13__Breast	SETD1A__Breast	4.63446174005574	3.71333862706767
MSH2	VAE_depth1_13	Pancan	dominant	Misssense_MTR	MSH2__VAE_depth1_13__Pancan__Misssense_MTR__dominant	MSH2__VAE_depth1_13__Pancan	MSH2__Pancan	2.95353142364505	2.25255241128457
HMG20B	VAE_depth1_2	Pancan	dominant	Misssense_MTR	HMG20B__VAE_depth1_2__Pancan__Misssense_MTR__dominant	HMG20B__VAE_depth1_2__Pancan	HMG20B__Pancan	3.43291223743731	2.26753386536022
BRCA1	IC2	Breast	dominant	PTV	BRCA1__IC2__Breast__PTV__dominant	BRCA1__IC2__Breast	BRCA1__Breast	1.05804077056899	1.41175703245885
BRCA2	IC4	Breast	dominant	PTV	BRCA2__IC4__Breast__PTV__dominant	BRCA2__IC4__Breast	BRCA2__Breast	2.34031639614576	2.86591065683411
MLH1	IC3	Pancan	dominant	PTV	MLH1__IC3__Pancan__PTV__dominant	MLH1__IC3__Pancan	MLH1__Pancan	4.25622458130633	4.18137876958836
MSH2	IC3	Pancan	dominant	PTV	MSH2__IC3__Pancan__PTV__dominant	MSH2__IC3__Pancan	MSH2__Pancan	2.41353640876756	0.880252434083853
BRCA1	IC4	Pancan	dominant	PTV	BRCA1__IC4__Pancan__PTV__dominant	BRCA1__IC4__Pancan	BRCA1__Pancan	0.939869966855976	1.8831953328142
BRCA2	IC4	Pancan	dominant	PTV	BRCA2__IC4__Pancan__PTV__dominant	BRCA2__IC4__Pancan	BRCA2__Pancan	1.78664454243696	2.17218217945136
PALB2	IC4	Pancan	dominant	PTV	PALB2__IC4__Pancan__PTV__dominant	PALB2__IC4__Pancan	PALB2__Pancan	1.81067876650097	1.79642508429663
BRCA2	VAE_depth1_6	Breast	dominant	PTV	BRCA2__VAE_depth1_6__Breast__PTV__dominant	BRCA2__VAE_depth1_6__Breast	BRCA2__Breast	5.47844877552357	5.86486242078821
BRCA2	VAE_depth1_8	Breast	dominant	PTV	BRCA2__VAE_depth1_8__Breast__PTV__dominant	BRCA2__VAE_depth1_8__Breast	BRCA2__Breast	6.88775261369099	7.31307415074834
MLH1	VAE_depth1_10	Pancan	dominant	PTV	MLH1__VAE_depth1_10__Pancan__PTV__dominant	MLH1__VAE_depth1_10__Pancan	MLH1__Pancan	7.19153672487045	6.34545139757884
MLH1	VAE_depth1_13	Pancan	dominant	PTV	MLH1__VAE_depth1_13__Pancan__PTV__dominant	MLH1__VAE_depth1_13__Pancan	MLH1__Pancan	11.4078055858746	14.1977148157744
MSH2	VAE_depth1_13	Pancan	dominant	PTV	MSH2__VAE_depth1_13__Pancan__PTV__dominant	MSH2__VAE_depth1_13__Pancan	MSH2__Pancan	7.28825275779019	3.5746839635975
BRCA1	VAE_depth1_6	Pancan	dominant	PTV	BRCA1__VAE_depth1_6__Pancan__PTV__dominant	BRCA1__VAE_depth1_6__Pancan	BRCA1__Pancan	3.12657753782918	2.8444772390087
BRCA2	VAE_depth1_6	Pancan	dominant	PTV	BRCA2__VAE_depth1_6__Pancan__PTV__dominant	BRCA2__VAE_depth1_6__Pancan	BRCA2__Pancan	4.30618112609882	4.08273318625233
PALB2	VAE_depth1_6	Pancan	dominant	PTV	PALB2__VAE_depth1_6__Pancan__PTV__dominant	PALB2__VAE_depth1_6__Pancan	PALB2__Pancan	3.68678037402986	3.3042161648333
BRCA1	VAE_depth1_8	Pancan	dominant	PTV	BRCA1__VAE_depth1_8__Pancan__PTV__dominant	BRCA1__VAE_depth1_8__Pancan	BRCA1__Pancan	2.7285295035388	6.28541945207573
BRCA2	VAE_depth1_8	Pancan	dominant	PTV	BRCA2__VAE_depth1_8__Pancan__PTV__dominant	BRCA2__VAE_depth1_8__Pancan	BRCA2__Pancan	5.47521136725446	5.52896558013195
PALB2	VAE_depth1_8	Pancan	dominant	PTV	PALB2__VAE_depth1_8__Pancan__PTV__dominant	PALB2__VAE_depth1_8__Pancan	PALB2__Pancan	5.41380304727062	4.61561086622058
CHD3	IC13	Bladder	dominant	PTV_Misssense_CADD15	CHD3__IC13__Bladder__PTV_Misssense_CADD15__dominant	CHD3__IC13__Bladder	CHD3__Bladder	1.21572938189794	0.92010965024938
NFRKB	IC1	Breast	dominant	PTV_Misssense_CADD15	NFRKB__IC1__Breast__PTV_Misssense_CADD15__dominant	NFRKB__IC1__Breast	NFRKB__Breast	0.37542771380339	0.0313380892637477
BRCA1	IC2	Breast	dominant	PTV_Misssense_CADD15	BRCA1__IC2__Breast__PTV_Misssense_CADD15__dominant	BRCA1__IC2__Breast	BRCA1__Breast	0.349625922271777	0.485967079281354
APC	IC3	Breast	dominant	PTV_Misssense_CADD15	APC__IC3__Breast__PTV_Misssense_CADD15__dominant	APC__IC3__Breast	APC__Breast	0.208467964098241	0.187557196408554
SETD1A	IC3	Breast	dominant	PTV_Misssense_CADD15	SETD1A__IC3__Breast__PTV_Misssense_CADD15__dominant	SETD1A__IC3__Breast	SETD1A__Breast	0.540445626901936	0.210326791748615
BRCA2	IC4	Breast	dominant	PTV_Misssense_CADD15	BRCA2__IC4__Breast__PTV_Misssense_CADD15__dominant	BRCA2__IC4__Breast	BRCA2__Breast	1.29070713977866	2.15673763411134
MDN1	IC3	Brain_glioma_multi	dominant	PTV_Misssense_CADD15	MDN1__IC3__Brain_glioma_multi__PTV_Misssense_CADD15__dominant	MDN1__IC3__Brain_glioma_multi	MDN1__Brain_glioma_multi	0.275109901890104	0.281952356517495
PIK3C2B	IC13	Lung_sq	dominant	PTV_Misssense_CADD15	PIK3C2B__IC13__Lung_sq__PTV_Misssense_CADD15__dominant	PIK3C2B__IC13__Lung_sq	PIK3C2B__Lung_sq	0.753270927699884	2.14633379347451
HERC2	IC13	Ovary	dominant	PTV_Misssense_CADD15	HERC2__IC13__Ovary__PTV_Misssense_CADD15__dominant	HERC2__IC13__Ovary	HERC2__Ovary	0.278155575409981	0.644986616406678
TRRAP	IC3	Ovary	dominant	PTV_Misssense_CADD15	TRRAP__IC3__Ovary__PTV_Misssense_CADD15__dominant	TRRAP__IC3__Ovary	TRRAP__Ovary	0.331875396574012	0.504093732508481
RBBP5	IC13	Pancan	dominant	PTV_Misssense_CADD15	RBBP5__IC13__Pancan__PTV_Misssense_CADD15__dominant	RBBP5__IC13__Pancan	RBBP5__Pancan	0.718990233594492	1.59031483020183
RAD51	IC14	Pancan	dominant	PTV_Misssense_CADD15	RAD51__IC14__Pancan__PTV_Misssense_CADD15__dominant	RAD51__IC14__Pancan	RAD51__Pancan	-0.516931251973892	-0.433691760313483
MAD2L2	IC3	Pancan	dominant	PTV_Misssense_CADD15	MAD2L2__IC3__Pancan__PTV_Misssense_CADD15__dominant	MAD2L2__IC3__Pancan	MAD2L2__Pancan	0.564139370769678	0.573302324959182
BRCA1	IC4	Pancan	dominant	PTV_Misssense_CADD15	BRCA1__IC4__Pancan__PTV_Misssense_CADD15__dominant	BRCA1__IC4__Pancan	BRCA1__Pancan	0.624252344182439	0.563072299462322
BRCA2	IC4	Pancan	dominant	PTV_Misssense_CADD15	BRCA2__IC4__Pancan__PTV_Misssense_CADD15__dominant	BRCA2__IC4__Pancan	BRCA2__Pancan	0.531708119497491	1.035650544595
PALB2	IC4	Pancan	dominant	PTV_Misssense_CADD15	PALB2__IC4__Pancan__PTV_Misssense_CADD15__dominant	PALB2__IC4__Pancan	PALB2__Pancan	0.439389435358755	0.458494081247359
ASCC2	IC9	Pancan	dominant	PTV_Misssense_CADD15	ASCC2__IC9__Pancan__PTV_Misssense_CADD15__dominant	ASCC2__IC9__Pancan	ASCC2__Pancan	0.552170742524237	0.261047422051009
HERC2	IC3	Prostate	dominant	PTV_Misssense_CADD15	HERC2__IC3__Prostate__PTV_Misssense_CADD15__dominant	HERC2__IC3__Prostate	HERC2__Prostate	0.0902113803086382	0.884689169346272
MTOR	IC3	Prostate	dominant	PTV_Misssense_CADD15	MTOR__IC3__Prostate__PTV_Misssense_CADD15__dominant	MTOR__IC3__Prostate	MTOR__Prostate	0.610564595007632	0.484349251676144
TTI2	IC3	Prostate	dominant	PTV_Misssense_CADD15	TTI2__IC3__Prostate__PTV_Misssense_CADD15__dominant	TTI2__IC3__Prostate	TTI2__Prostate	1.1696008062683	2.08214259153797
EP300	IC13	Skin	dominant	PTV_Misssense_CADD15	EP300__IC13__Skin__PTV_Misssense_CADD15__dominant	EP300__IC13__Skin	EP300__Skin	0.578340502836084	0.758071543145725
BRCA2	VAE_depth1_6	Breast	dominant	PTV_Misssense_CADD15	BRCA2__VAE_depth1_6__Breast__PTV_Misssense_CADD15__dominant	BRCA2__VAE_depth1_6__Breast	BRCA2__Breast	2.51798313767153	4.31032962193147
BRCA2	VAE_depth1_8	Breast	dominant	PTV_Misssense_CADD15	BRCA2__VAE_depth1_8__Breast__PTV_Misssense_CADD15__dominant	BRCA2__VAE_depth1_8__Breast	BRCA2__Breast	4.18853447019434	5.81327703220704
KANSL1	VAE_depth1_13	Lung_ad	dominant	PTV_Misssense_CADD15	KANSL1__VAE_depth1_13__Lung_ad__PTV_Misssense_CADD15__dominant	KANSL1__VAE_depth1_13__Lung_ad	KANSL1__Lung_ad	0.975994867360565	2.73775938557198
TRRAP	VAE_depth1_13	Ovary	dominant	PTV_Misssense_CADD15	TRRAP__VAE_depth1_13__Ovary__PTV_Misssense_CADD15__dominant	TRRAP__VAE_depth1_13__Ovary	TRRAP__Ovary	0.667275941996651	1.45413767293519
BRCA2	VAE_depth1_6	Pancan	dominant	PTV_Misssense_CADD15	BRCA2__VAE_depth1_6__Pancan__PTV_Misssense_CADD15__dominant	BRCA2__VAE_depth1_6__Pancan	BRCA2__Pancan	1.06505031859667	1.78441619843785
BRCA1	VAE_depth1_8	Pancan	dominant	PTV_Misssense_CADD15	BRCA1__VAE_depth1_8__Pancan__PTV_Misssense_CADD15__dominant	BRCA1__VAE_depth1_8__Pancan	BRCA1__Pancan	1.77672414875177	1.96576311520641
BRCA2	VAE_depth1_8	Pancan	dominant	PTV_Misssense_CADD15	BRCA2__VAE_depth1_8__Pancan__PTV_Misssense_CADD15__dominant	BRCA2__VAE_depth1_8__Pancan	BRCA2__Pancan	1.59560815616644	2.80986880238324
MTOR	VAE_depth1_13	Prostate	dominant	PTV_Misssense_CADD15	MTOR__VAE_depth1_13__Prostate__PTV_Misssense_CADD15__dominant	MTOR__VAE_depth1_13__Prostate	MTOR__Prostate	2.50130108521933	1.70892928954411
EXO1	VAE_depth1_10	Skin	dominant	PTV_Misssense_CADD15	EXO1__VAE_depth1_10__Skin__PTV_Misssense_CADD15__dominant	EXO1__VAE_depth1_10__Skin	EXO1__Skin	1.15891890376622	1.93125931451785
SMC2	VAE_depth1_1	Skin	dominant	PTV_Misssense_CADD15	SMC2__VAE_depth1_1__Skin__PTV_Misssense_CADD15__dominant	SMC2__VAE_depth1_1__Skin	SMC2__Skin	2.05168430926993	1.76439311771222
EXO1	VAE_depth1_6	Skin	dominant	PTV_Misssense_CADD15	EXO1__VAE_depth1_6__Skin__PTV_Misssense_CADD15__dominant	EXO1__VAE_depth1_6__Skin	EXO1__Skin	2.35062366456075	1.69786201156163
PAXIP1	VAE_depth1_6	Skin	dominant	PTV_Misssense_CADD15	PAXIP1__VAE_depth1_6__Skin__PTV_Misssense_CADD15__dominant	PAXIP1__VAE_depth1_6__Skin	PAXIP1__Skin	2.18738611637488	1.87964560682305
RIF1	VAE_depth1_6	Skin	dominant	PTV_Misssense_CADD15	RIF1__VAE_depth1_6__Skin__PTV_Misssense_CADD15__dominant	RIF1__VAE_depth1_6__Skin	RIF1__Skin	0.915552392205968	0.678896499287049
BRCA1	IC2	Breast	dominant	PTV_Misssense_CADD25	BRCA1__IC2__Breast__PTV_Misssense_CADD25__dominant	BRCA1__IC2__Breast	BRCA1__Breast	0.889703736585872	1.25116911358135
BRCA1	IC4	Breast	dominant	PTV_Misssense_CADD25	BRCA1__IC4__Breast__PTV_Misssense_CADD25__dominant	BRCA1__IC4__Breast	BRCA1__Breast	1.61554902811443	2.05135440567445
BRCA2	IC4	Breast	dominant	PTV_Misssense_CADD25	BRCA2__IC4__Breast__PTV_Misssense_CADD25__dominant	BRCA2__IC4__Breast	BRCA2__Breast	1.7583535305245	2.90784143958931
BRCA1	IC2	Pancan	dominant	PTV_Misssense_CADD25	BRCA1__IC2__Pancan__PTV_Misssense_CADD25__dominant	BRCA1__IC2__Pancan	BRCA1__Pancan	0.36864704488148	0.541730582350332
MLH1	IC3	Pancan	dominant	PTV_Misssense_CADD25	MLH1__IC3__Pancan__PTV_Misssense_CADD25__dominant	MLH1__IC3__Pancan	MLH1__Pancan	0.355640573151896	0.572254915244094
MSH2	IC3	Pancan	dominant	PTV_Misssense_CADD25	MSH2__IC3__Pancan__PTV_Misssense_CADD25__dominant	MSH2__IC3__Pancan	MSH2__Pancan	0.838552474743241	0.441923111210719
BRCA1	IC4	Pancan	dominant	PTV_Misssense_CADD25	BRCA1__IC4__Pancan__PTV_Misssense_CADD25__dominant	BRCA1__IC4__Pancan	BRCA1__Pancan	0.897214018829209	1.55510691456328
BRCA2	IC4	Pancan	dominant	PTV_Misssense_CADD25	BRCA2__IC4__Pancan__PTV_Misssense_CADD25__dominant	BRCA2__IC4__Pancan	BRCA2__Pancan	0.949444767589513	1.79530224147389
DNMT1	IC4	Pancan	dominant	PTV_Misssense_CADD25	DNMT1__IC4__Pancan__PTV_Misssense_CADD25__dominant	DNMT1__IC4__Pancan	DNMT1__Pancan	0.984622732507962	0.464039246403654
PALB2	IC4	Pancan	dominant	PTV_Misssense_CADD25	PALB2__IC4__Pancan__PTV_Misssense_CADD25__dominant	PALB2__IC4__Pancan	PALB2__Pancan	0.737342766712814	1.52975943143222
BRCA2	IC8	Pancan	dominant	PTV_Misssense_CADD25	BRCA2__IC8__Pancan__PTV_Misssense_CADD25__dominant	BRCA2__IC8__Pancan	BRCA2__Pancan	-0.145798737959333	-0.537222594087703
ASCC2	IC9	Pancan	dominant	PTV_Misssense_CADD25	ASCC2__IC9__Pancan__PTV_Misssense_CADD25__dominant	ASCC2__IC9__Pancan	ASCC2__Pancan	0.771836987288743	0.897434191268155
POT1	IC9	Pancan	dominant	PTV_Misssense_CADD25	POT1__IC9__Pancan__PTV_Misssense_CADD25__dominant	POT1__IC9__Pancan	POT1__Pancan	0.605215003542915	0.837863819860291
EYA2	IC4	Prostate	dominant	PTV_Misssense_CADD25	EYA2__IC4__Prostate__PTV_Misssense_CADD25__dominant	EYA2__IC4__Prostate	EYA2__Prostate	1.12179834539369	1.60888290211192
BRCA2	VAE_depth1_6	Breast	dominant	PTV_Misssense_CADD25	BRCA2__VAE_depth1_6__Breast__PTV_Misssense_CADD25__dominant	BRCA2__VAE_depth1_6__Breast	BRCA2__Breast	4.14865434953575	5.76537000973792
BRCA2	VAE_depth1_8	Breast	dominant	PTV_Misssense_CADD25	BRCA2__VAE_depth1_8__Breast__PTV_Misssense_CADD25__dominant	BRCA2__VAE_depth1_8__Breast	BRCA2__Breast	5.30301452293215	7.52837428048615
MSH2	VAE_depth1_13	Pancan	dominant	PTV_Misssense_CADD25	MSH2__VAE_depth1_13__Pancan__PTV_Misssense_CADD25__dominant	MSH2__VAE_depth1_13__Pancan	MSH2__Pancan	2.61825186650007	1.63587534700958
BRCA1	VAE_depth1_6	Pancan	dominant	PTV_Misssense_CADD25	BRCA1__VAE_depth1_6__Pancan__PTV_Misssense_CADD25__dominant	BRCA1__VAE_depth1_6__Pancan	BRCA1__Pancan	2.73704464234623	2.55050257276038
BRCA2	VAE_depth1_6	Pancan	dominant	PTV_Misssense_CADD25	BRCA2__VAE_depth1_6__Pancan__PTV_Misssense_CADD25__dominant	BRCA2__VAE_depth1_6__Pancan	BRCA2__Pancan	2.25151431595316	3.44306946486872
PALB2	VAE_depth1_6	Pancan	dominant	PTV_Misssense_CADD25	PALB2__VAE_depth1_6__Pancan__PTV_Misssense_CADD25__dominant	PALB2__VAE_depth1_6__Pancan	PALB2__Pancan	1.41700664670177	2.77073789922633
BRCA1	VAE_depth1_8	Pancan	dominant	PTV_Misssense_CADD25	BRCA1__VAE_depth1_8__Pancan__PTV_Misssense_CADD25__dominant	BRCA1__VAE_depth1_8__Pancan	BRCA1__Pancan	2.36793318193447	5.13382997943879
BRCA2	VAE_depth1_8	Pancan	dominant	PTV_Misssense_CADD25	BRCA2__VAE_depth1_8__Pancan__PTV_Misssense_CADD25__dominant	BRCA2__VAE_depth1_8__Pancan	BRCA2__Pancan	2.81338623768769	4.6218147113468
DNMT1	VAE_depth1_8	Pancan	dominant	PTV_Misssense_CADD25	DNMT1__VAE_depth1_8__Pancan__PTV_Misssense_CADD25__dominant	DNMT1__VAE_depth1_8__Pancan	DNMT1__Pancan	4.13836822455889	1.63616433736978
PALB2	VAE_depth1_8	Pancan	dominant	PTV_Misssense_CADD25	PALB2__VAE_depth1_8__Pancan__PTV_Misssense_CADD25__dominant	PALB2__VAE_depth1_8__Pancan	PALB2__Pancan	2.16239334128272	4.05326977546595
EXO1	VAE_depth1_10	Skin	dominant	PTV_Misssense_CADD25	EXO1__VAE_depth1_10__Skin__PTV_Misssense_CADD25__dominant	EXO1__VAE_depth1_10__Skin	EXO1__Skin	2.1523887335535	3.3617392742016
EXO1	VAE_depth1_6	Skin	dominant	PTV_Misssense_CADD25	EXO1__VAE_depth1_6__Skin__PTV_Misssense_CADD25__dominant	EXO1__VAE_depth1_6__Skin	EXO1__Skin	4.08568642032956	2.95501777397377
BRCA1	IC2	Breast	recessive	PTV	BRCA1__IC2__Breast__PTV__recessive	BRCA1__IC2__Breast	BRCA1__Breast	1.21981685530869	1.69756208002456
BRCA2	IC4	Breast	recessive	PTV	BRCA2__IC4__Breast__PTV__recessive	BRCA2__IC4__Breast	BRCA2__Breast	2.48717643127215	2.8294207482976
BRCA1	IC2	Pancan	recessive	PTV	BRCA1__IC2__Pancan__PTV__recessive	BRCA1__IC2__Pancan	BRCA1__Pancan	0.480073082924863	0.944474455087088
BRCA1	IC4	Pancan	recessive	PTV	BRCA1__IC4__Pancan__PTV__recessive	BRCA1__IC4__Pancan	BRCA1__Pancan	0.952558942594736	2.20682551961745
BRCA2	IC4	Pancan	recessive	PTV	BRCA2__IC4__Pancan__PTV__recessive	BRCA2__IC4__Pancan	BRCA2__Pancan	2.23512436521994	2.68045003737504
PALB2	IC4	Pancan	recessive	PTV	PALB2__IC4__Pancan__PTV__recessive	PALB2__IC4__Pancan	PALB2__Pancan	3.97925616345595	3.44569993706278
BRCA2	VAE_depth1_6	Breast	recessive	PTV	BRCA2__VAE_depth1_6__Breast__PTV__recessive	BRCA2__VAE_depth1_6__Breast	BRCA2__Breast	6.22511866677215	5.7426817445152
BRCA2	VAE_depth1_8	Breast	recessive	PTV	BRCA2__VAE_depth1_8__Breast__PTV__recessive	BRCA2__VAE_depth1_8__Breast	BRCA2__Breast	8.20657724614708	7.18437327833141
BRCA1	VAE_depth1_6	Pancan	recessive	PTV	BRCA1__VAE_depth1_6__Pancan__PTV__recessive	BRCA1__VAE_depth1_6__Pancan	BRCA1__Pancan	3.87222224862862	3.4584270821413
BRCA2	VAE_depth1_6	Pancan	recessive	PTV	BRCA2__VAE_depth1_6__Pancan__PTV__recessive	BRCA2__VAE_depth1_6__Pancan	BRCA2__Pancan	5.53985902021773	4.85084104811162
BRCA2	VAE_depth1_8	Pancan	recessive	PTV	BRCA2__VAE_depth1_8__Pancan__PTV__recessive	BRCA2__VAE_depth1_8__Pancan	BRCA2__Pancan	7.5017721710044	6.9093720028687
PALB2	VAE_depth1_8	Pancan	recessive	PTV	PALB2__VAE_depth1_8__Pancan__PTV__recessive	PALB2__VAE_depth1_8__Pancan	PALB2__Pancan	10.9324664293447	10.3604205776148
PER1	IC12	Breast	recessive	PTV_Misssense_CADD15	PER1__IC12__Breast__PTV_Misssense_CADD15__recessive	PER1__IC12__Breast	PER1__Breast	0.532216372524379	0.308686156647038
BRCA1	IC2	Breast	recessive	PTV_Misssense_CADD15	BRCA1__IC2__Breast__PTV_Misssense_CADD15__recessive	BRCA1__IC2__Breast	BRCA1__Breast	1.23052552788896	0.834987254179133
BRCA2	IC4	Breast	recessive	PTV_Misssense_CADD15	BRCA2__IC4__Breast__PTV_Misssense_CADD15__recessive	BRCA2__IC4__Breast	BRCA2__Breast	2.09179914149229	2.51132044620035
AQR	IC12	Pancan	recessive	PTV_Misssense_CADD15	AQR__IC12__Pancan__PTV_Misssense_CADD15__recessive	AQR__IC12__Pancan	AQR__Pancan	1.69177640566301	2.1253038726402
REV3L	IC14	Pancan	recessive	PTV_Misssense_CADD15	REV3L__IC14__Pancan__PTV_Misssense_CADD15__recessive	REV3L__IC14__Pancan	REV3L__Pancan	-0.137619543014968	-0.239524714440712
BRCA1	IC2	Pancan	recessive	PTV_Misssense_CADD15	BRCA1__IC2__Pancan__PTV_Misssense_CADD15__recessive	BRCA1__IC2__Pancan	BRCA1__Pancan	0.635377485198788	0.561506386697568
BRCA1	IC4	Pancan	recessive	PTV_Misssense_CADD15	BRCA1__IC4__Pancan__PTV_Misssense_CADD15__recessive	BRCA1__IC4__Pancan	BRCA1__Pancan	1.29889253645414	1.56401954968019
BRCA2	IC4	Pancan	recessive	PTV_Misssense_CADD15	BRCA2__IC4__Pancan__PTV_Misssense_CADD15__recessive	BRCA2__IC4__Pancan	BRCA2__Pancan	1.53246327556262	2.28729133572651
PALB2	IC4	Pancan	recessive	PTV_Misssense_CADD15	PALB2__IC4__Pancan__PTV_Misssense_CADD15__recessive	PALB2__IC4__Pancan	PALB2__Pancan	3.17015955606241	2.4798364236996
FANCC	IC9	Pancan	recessive	PTV_Misssense_CADD15	FANCC__IC9__Pancan__PTV_Misssense_CADD15__recessive	FANCC__IC9__Pancan	FANCC__Pancan	1.69321738880276	1.6037864322666
BRCA2	VAE_depth1_6	Breast	recessive	PTV_Misssense_CADD15	BRCA2__VAE_depth1_6__Breast__PTV_Misssense_CADD15__recessive	BRCA2__VAE_depth1_6__Breast	BRCA2__Breast	5.5822646003894	4.82577750936815
BRCA2	VAE_depth1_8	Breast	recessive	PTV_Misssense_CADD15	BRCA2__VAE_depth1_8__Breast__PTV_Misssense_CADD15__recessive	BRCA2__VAE_depth1_8__Breast	BRCA2__Breast	7.1008858030587	6.74963507661117
BRCA1	VAE_depth1_8	Pancan	recessive	PTV_Misssense_CADD15	BRCA1__VAE_depth1_8__Pancan__PTV_Misssense_CADD15__recessive	BRCA1__VAE_depth1_8__Pancan	BRCA1__Pancan	3.63862529967885	4.96648828257178
BRCA2	VAE_depth1_8	Pancan	recessive	PTV_Misssense_CADD15	BRCA2__VAE_depth1_8__Pancan__PTV_Misssense_CADD15__recessive	BRCA2__VAE_depth1_8__Pancan	BRCA2__Pancan	5.3225716617421	6.26403314485085
PALB2	VAE_depth1_8	Pancan	recessive	PTV_Misssense_CADD15	PALB2__VAE_depth1_8__Pancan__PTV_Misssense_CADD15__recessive	PALB2__VAE_depth1_8__Pancan	PALB2__Pancan	8.67339077333146	7.60092099474306
BRCA1	IC2	Breast	recessive	PTV_Misssense_CADD25	BRCA1__IC2__Breast__PTV_Misssense_CADD25__recessive	BRCA1__IC2__Breast	BRCA1__Breast	1.2407602035979	1.69236746197351
BRCA1	IC4	Breast	recessive	PTV_Misssense_CADD25	BRCA1__IC4__Breast__PTV_Misssense_CADD25__recessive	BRCA1__IC4__Breast	BRCA1__Breast	1.83609816344764	2.12800171228612
BRCA2	IC4	Breast	recessive	PTV_Misssense_CADD25	BRCA2__IC4__Breast__PTV_Misssense_CADD25__recessive	BRCA2__IC4__Breast	BRCA2__Breast	2.5104305457647	2.88574748841589
BRCA1	IC2	Pancan	recessive	PTV_Misssense_CADD25	BRCA1__IC2__Pancan__PTV_Misssense_CADD25__recessive	BRCA1__IC2__Pancan	BRCA1__Pancan	0.747384689070696	0.792777126525434
BRCA1	IC4	Pancan	recessive	PTV_Misssense_CADD25	BRCA1__IC4__Pancan__PTV_Misssense_CADD25__recessive	BRCA1__IC4__Pancan	BRCA1__Pancan	1.42189546974103	2.0358143399406
BRCA2	IC4	Pancan	recessive	PTV_Misssense_CADD25	BRCA2__IC4__Pancan__PTV_Misssense_CADD25__recessive	BRCA2__IC4__Pancan	BRCA2__Pancan	2.26041523245753	2.56053638509952
PALB2	IC4	Pancan	recessive	PTV_Misssense_CADD25	PALB2__IC4__Pancan__PTV_Misssense_CADD25__recessive	PALB2__IC4__Pancan	PALB2__Pancan	3.16974056740771	3.4459622686407
BRCA2	VAE_depth1_6	Breast	recessive	PTV_Misssense_CADD25	BRCA2__VAE_depth1_6__Breast__PTV_Misssense_CADD25__recessive	BRCA2__VAE_depth1_6__Breast	BRCA2__Breast	6.59627692281151	5.61853352802972
BRCA2	VAE_depth1_8	Breast	recessive	PTV_Misssense_CADD25	BRCA2__VAE_depth1_8__Breast__PTV_Misssense_CADD25__recessive	BRCA2__VAE_depth1_8__Breast	BRCA2__Breast	8.72227665883526	7.47450988724604
BRCA1	VAE_depth1_8	Pancan	recessive	PTV_Misssense_CADD25	BRCA1__VAE_depth1_8__Pancan__PTV_Misssense_CADD25__recessive	BRCA1__VAE_depth1_8__Pancan	BRCA1__Pancan	3.59982940151208	6.68719095659405
BRCA2	VAE_depth1_8	Pancan	recessive	PTV_Misssense_CADD25	BRCA2__VAE_depth1_8__Pancan__PTV_Misssense_CADD25__recessive	BRCA2__VAE_depth1_8__Pancan	BRCA2__Pancan	7.73218520220588	6.68182175366655
PALB2	VAE_depth1_8	Pancan	recessive	PTV_Misssense_CADD25	PALB2__VAE_depth1_8__Pancan__PTV_Misssense_CADD25__recessive	PALB2__VAE_depth1_8__Pancan	PALB2__Pancan	8.6795273231106	10.3611251324819

## Sheet: Supplementary Dataset 3
Supplementary Dataset 3		List of genes replicating at a FDR of 2 %.
gene	pheno	cancer_type	model	variants	variant_pheno_cancer_type_snp_model	variant_pheno_cancer_type	variant_cancer_type	TCGA	WGS
PRPF19	IC5	Pancan	additive	Misssense_CCR	PRPF19__IC5__Pancan__Misssense_CCR__additive	PRPF19__IC5__Pancan	PRPF19__Pancan	2.15904243786464	2.06894422044362
SETD1A	IC3	Breast	additive	Misssense_MTR	SETD1A__IC3__Breast__Misssense_MTR__additive	SETD1A__IC3__Breast	SETD1A__Breast	1.85670058868802	1.59009516224601
TRRAP	IC4	Breast	additive	Misssense_MTR	TRRAP__IC4__Breast__Misssense_MTR__additive	TRRAP__IC4__Breast	TRRAP__Breast	2.76453144287219	1.4192362476806
HERC2	IC13	Ovary	additive	Misssense_MTR	HERC2__IC13__Ovary__Misssense_MTR__additive	HERC2__IC13__Ovary	HERC2__Ovary	1.23889877400464	2.40249975452106
ZRANB3	IC1	Pancan	additive	Misssense_MTR	ZRANB3__IC1__Pancan__Misssense_MTR__additive	ZRANB3__IC1__Pancan	ZRANB3__Pancan	0.58853885783912	0.292860832707029
SUPT20H	IC3	Pancan	additive	Misssense_MTR	SUPT20H__IC3__Pancan__Misssense_MTR__additive	SUPT20H__IC3__Pancan	SUPT20H__Pancan	0.592228018193966	0.206961299721577
RECQL	IC4	Pancan	additive	Misssense_MTR	RECQL__IC4__Pancan__Misssense_MTR__additive	RECQL__IC4__Pancan	RECQL__Pancan	0.30337625713895	0.645406526503497
ACTL6A	IC8	Pancan	additive	Misssense_MTR	ACTL6A__IC8__Pancan__Misssense_MTR__additive	ACTL6A__IC8__Pancan	ACTL6A__Pancan	-0.625787910444244	-1.313296695093
ASCC2	IC9	Pancan	additive	Misssense_MTR	ASCC2__IC9__Pancan__Misssense_MTR__additive	ASCC2__IC9__Pancan	ASCC2__Pancan	0.632856280694445	0.708115883477242
NCAPG2	IC9	Pancan	additive	Misssense_MTR	NCAPG2__IC9__Pancan__Misssense_MTR__additive	NCAPG2__IC9__Pancan	NCAPG2__Pancan	0.752079001316234	0.862632590361967
SETD1A	VAE_depth1_13	Breast	additive	Misssense_MTR	SETD1A__VAE_depth1_13__Breast__Misssense_MTR__additive	SETD1A__VAE_depth1_13__Breast	SETD1A__Breast	4.63446174005574	3.71333862706767
MDN1	VAE_depth1_3	Colon_Rectum	additive	Misssense_MTR	MDN1__VAE_depth1_3__Colon_Rectum__Misssense_MTR__additive	MDN1__VAE_depth1_3__Colon_Rectum	MDN1__Colon_Rectum	1.95351895725023	2.43119132336108
MSH2	VAE_depth1_13	Pancan	additive	Misssense_MTR	MSH2__VAE_depth1_13__Pancan__Misssense_MTR__additive	MSH2__VAE_depth1_13__Pancan	MSH2__Pancan	2.95353142364505	2.25255241128457
SUPT20H	VAE_depth1_13	Pancan	additive	Misssense_MTR	SUPT20H__VAE_depth1_13__Pancan__Misssense_MTR__additive	SUPT20H__VAE_depth1_13__Pancan	SUPT20H__Pancan	2.52546345371746	0.944883545892309
HMG20B	VAE_depth1_2	Pancan	additive	Misssense_MTR	HMG20B__VAE_depth1_2__Pancan__Misssense_MTR__additive	HMG20B__VAE_depth1_2__Pancan	HMG20B__Pancan	3.43291223743731	2.26753386536022
BRCA1	IC12	Breast	additive	PTV	BRCA1__IC12__Breast__PTV__additive	BRCA1__IC12__Breast	BRCA1__Breast	0.19898371489827	0.163498052296848
BRCA1	IC2	Breast	additive	PTV	BRCA1__IC2__Breast__PTV__additive	BRCA1__IC2__Breast	BRCA1__Breast	0.589201933846356	0.803843911610501
BRCA2	IC4	Breast	additive	PTV	BRCA2__IC4__Breast__PTV__additive	BRCA2__IC4__Breast	BRCA2__Breast	1.57705969930129	1.54451789906302
BRCA1	IC2	Pancan	additive	PTV	BRCA1__IC2__Pancan__PTV__additive	BRCA1__IC2__Pancan	BRCA1__Pancan	0.227628079122112	0.452464609863867
MLH1	IC3	Pancan	additive	PTV	MLH1__IC3__Pancan__PTV__additive	MLH1__IC3__Pancan	MLH1__Pancan	2.99968038899463	2.09068938479418
MSH2	IC3	Pancan	additive	PTV	MSH2__IC3__Pancan__PTV__additive	MSH2__IC3__Pancan	MSH2__Pancan	2.06588848953466	0.880252434083853
APEX1	IC4	Pancan	additive	PTV	APEX1__IC4__Pancan__PTV__additive	APEX1__IC4__Pancan	APEX1__Pancan	1.09672547185671	1.06738176362473
BRCA1	IC4	Pancan	additive	PTV	BRCA1__IC4__Pancan__PTV__additive	BRCA1__IC4__Pancan	BRCA1__Pancan	0.554814058574975	1.08026780555225
BRCA2	IC4	Pancan	additive	PTV	BRCA2__IC4__Pancan__PTV__additive	BRCA2__IC4__Pancan	BRCA2__Pancan	1.24268500527465	1.31270134932764
PALB2	IC4	Pancan	additive	PTV	PALB2__IC4__Pancan__PTV__additive	PALB2__IC4__Pancan	PALB2__Pancan	1.62239741760975	1.47248484786813
BRCA2	VAE_depth1_6	Breast	additive	PTV	BRCA2__VAE_depth1_6__Breast__PTV__additive	BRCA2__VAE_depth1_6__Breast	BRCA2__Breast	3.75920587078846	3.14434579279118
BRCA2	VAE_depth1_8	Breast	additive	PTV	BRCA2__VAE_depth1_8__Breast__PTV__additive	BRCA2__VAE_depth1_8__Breast	BRCA2__Breast	4.79126842364104	3.93606574134636
MLH1	VAE_depth1_10	Pancan	additive	PTV	MLH1__VAE_depth1_10__Pancan__PTV__additive	MLH1__VAE_depth1_10__Pancan	MLH1__Pancan	5.56143329976577	3.17272569878942
MLH1	VAE_depth1_13	Pancan	additive	PTV	MLH1__VAE_depth1_13__Pancan__PTV__additive	MLH1__VAE_depth1_13__Pancan	MLH1__Pancan	8.15498886396971	7.09885740788721
MSH2	VAE_depth1_13	Pancan	additive	PTV	MSH2__VAE_depth1_13__Pancan__PTV__additive	MSH2__VAE_depth1_13__Pancan	MSH2__Pancan	6.46462107468188	3.5746839635975
BRCA2	VAE_depth1_1	Pancan	additive	PTV	BRCA2__VAE_depth1_1__Pancan__PTV__additive	BRCA2__VAE_depth1_1__Pancan	BRCA2__Pancan	0.716754158201009	1.27489639307841
BRCA1	VAE_depth1_6	Pancan	additive	PTV	BRCA1__VAE_depth1_6__Pancan__PTV__additive	BRCA1__VAE_depth1_6__Pancan	BRCA1__Pancan	1.99384946045027	1.66195896713963
BRCA2	VAE_depth1_6	Pancan	additive	PTV	BRCA2__VAE_depth1_6__Pancan__PTV__additive	BRCA2__VAE_depth1_6__Pancan	BRCA2__Pancan	3.02676235381769	2.4233068398801
PALB2	VAE_depth1_6	Pancan	additive	PTV	PALB2__VAE_depth1_6__Pancan__PTV__additive	PALB2__VAE_depth1_6__Pancan	PALB2__Pancan	3.69797531868126	2.31859002605273
APEX1	VAE_depth1_8	Pancan	additive	PTV	APEX1__VAE_depth1_8__Pancan__PTV__additive	APEX1__VAE_depth1_8__Pancan	APEX1__Pancan	3.56853765732876	3.59904153109445
ATR	VAE_depth1_8	Pancan	additive	PTV	ATR__VAE_depth1_8__Pancan__PTV__additive	ATR__VAE_depth1_8__Pancan	ATR__Pancan	1.30968148136396	7.5681743701708
BRCA1	VAE_depth1_8	Pancan	additive	PTV	BRCA1__VAE_depth1_8__Pancan__PTV__additive	BRCA1__VAE_depth1_8__Pancan	BRCA1__Pancan	1.54989369378248	3.54652733666516
BRCA2	VAE_depth1_8	Pancan	additive	PTV	BRCA2__VAE_depth1_8__Pancan__PTV__additive	BRCA2__VAE_depth1_8__Pancan	BRCA2__Pancan	3.92172357957412	3.36179707630405
PALB2	VAE_depth1_8	Pancan	additive	PTV	PALB2__VAE_depth1_8__Pancan__PTV__additive	PALB2__VAE_depth1_8__Pancan	PALB2__Pancan	4.72609629018406	4.03470159870845
CHD3	IC13	Bladder	additive	PTV_Misssense_CADD15	CHD3__IC13__Bladder__PTV_Misssense_CADD15__additive	CHD3__IC13__Bladder	CHD3__Bladder	1.21572938189794	0.46005482512469
PER1	IC12	Breast	additive	PTV_Misssense_CADD15	PER1__IC12__Breast__PTV_Misssense_CADD15__additive	PER1__IC12__Breast	PER1__Breast	0.144300920615359	0.114334757461932
ELP2	IC13	Breast	additive	PTV_Misssense_CADD15	ELP2__IC13__Breast__PTV_Misssense_CADD15__additive	ELP2__IC13__Breast	ELP2__Breast	1.57581816702528	1.11322719884358
BRCA1	IC2	Breast	additive	PTV_Misssense_CADD15	BRCA1__IC2__Breast__PTV_Misssense_CADD15__additive	BRCA1__IC2__Breast	BRCA1__Breast	0.390644153671979	0.373224894075988
APC	IC3	Breast	additive	PTV_Misssense_CADD15	APC__IC3__Breast__PTV_Misssense_CADD15__additive	APC__IC3__Breast	APC__Breast	0.208467964098241	0.152595081266224
SETD1A	IC3	Breast	additive	PTV_Misssense_CADD15	SETD1A__IC3__Breast__PTV_Misssense_CADD15__additive	SETD1A__IC3__Breast	SETD1A__Breast	0.540445626901936	0.210326791748615
BRCA2	IC4	Breast	additive	PTV_Misssense_CADD15	BRCA2__IC4__Breast__PTV_Misssense_CADD15__additive	BRCA2__IC4__Breast	BRCA2__Breast	1.05233326872526	1.30764885402426
MDN1	IC3	Brain_glioma_multi	additive	PTV_Misssense_CADD15	MDN1__IC3__Brain_glioma_multi__PTV_Misssense_CADD15__additive	MDN1__IC3__Brain_glioma_multi	MDN1__Brain_glioma_multi	0.413228934253768	0.281952356517495
FANCM	IC8	Brain_glioma_multi	additive	PTV_Misssense_CADD15	FANCM__IC8__Brain_glioma_multi__PTV_Misssense_CADD15__additive	FANCM__IC8__Brain_glioma_multi	FANCM__Brain_glioma_multi	1.47000075643832	1.5498199531755
TELO2	IC3	Kidney	additive	PTV_Misssense_CADD15	TELO2__IC3__Kidney__PTV_Misssense_CADD15__additive	TELO2__IC3__Kidney	TELO2__Kidney	0.524281671712632	2.60326680102737
PIK3C2B	IC13	Lung_sq	additive	PTV_Misssense_CADD15	PIK3C2B__IC13__Lung_sq__PTV_Misssense_CADD15__additive	PIK3C2B__IC13__Lung_sq	PIK3C2B__Lung_sq	0.753270927699884	2.14633379347451
DIS3L2	IC13	Ovary	additive	PTV_Misssense_CADD15	DIS3L2__IC13__Ovary__PTV_Misssense_CADD15__additive	DIS3L2__IC13__Ovary	DIS3L2__Ovary	1.2225630126846	0.508924399523817
TRRAP	IC3	Ovary	additive	PTV_Misssense_CADD15	TRRAP__IC3__Ovary__PTV_Misssense_CADD15__additive	TRRAP__IC3__Ovary	TRRAP__Ovary	0.177102658119962	0.293815098319282
RBBP8	IC12	Pancan	additive	PTV_Misssense_CADD15	RBBP8__IC12__Pancan__PTV_Misssense_CADD15__additive	RBBP8__IC12__Pancan	RBBP8__Pancan	-0.0785630076831165	-0.19125830876249
SMC1A	IC12	Pancan	additive	PTV_Misssense_CADD15	SMC1A__IC12__Pancan__PTV_Misssense_CADD15__additive	SMC1A__IC12__Pancan	SMC1A__Pancan	0.412228098876873	0.448995969051154
KDM1A	IC13	Pancan	additive	PTV_Misssense_CADD15	KDM1A__IC13__Pancan__PTV_Misssense_CADD15__additive	KDM1A__IC13__Pancan	KDM1A__Pancan	0.794243101903691	0.444094178588455
MSH3	IC13	Pancan	additive	PTV_Misssense_CADD15	MSH3__IC13__Pancan__PTV_Misssense_CADD15__additive	MSH3__IC13__Pancan	MSH3__Pancan	0.36943863352285	0.245093794998228
RBBP5	IC13	Pancan	additive	PTV_Misssense_CADD15	RBBP5__IC13__Pancan__PTV_Misssense_CADD15__additive	RBBP5__IC13__Pancan	RBBP5__Pancan	0.718990233594492	1.00132590582791
PIAS1	IC1	Pancan	additive	PTV_Misssense_CADD15	PIAS1__IC1__Pancan__PTV_Misssense_CADD15__additive	PIAS1__IC1__Pancan	PIAS1__Pancan	0.229722667169104	0.0916439685783256
BRCA1	IC2	Pancan	additive	PTV_Misssense_CADD15	BRCA1__IC2__Pancan__PTV_Misssense_CADD15__additive	BRCA1__IC2__Pancan	BRCA1__Pancan	0.0894539828234151	0.222957065043759
MAD2L2	IC3	Pancan	additive	PTV_Misssense_CADD15	MAD2L2__IC3__Pancan__PTV_Misssense_CADD15__additive	MAD2L2__IC3__Pancan	MAD2L2__Pancan	0.564139370769678	0.314521774537287
BRCA1	IC4	Pancan	additive	PTV_Misssense_CADD15	BRCA1__IC4__Pancan__PTV_Misssense_CADD15__additive	BRCA1__IC4__Pancan	BRCA1__Pancan	0.536503609829092	0.543681308490807
BRCA2	IC4	Pancan	additive	PTV_Misssense_CADD15	BRCA2__IC4__Pancan__PTV_Misssense_CADD15__additive	BRCA2__IC4__Pancan	BRCA2__Pancan	0.525985606409633	0.8908622465896
PALB2	IC4	Pancan	additive	PTV_Misssense_CADD15	PALB2__IC4__Pancan__PTV_Misssense_CADD15__additive	PALB2__IC4__Pancan	PALB2__Pancan	0.570676190039155	0.563314208597724
KMT5A	IC6	Pancan	additive	PTV_Misssense_CADD15	KMT5A__IC6__Pancan__PTV_Misssense_CADD15__additive	KMT5A__IC6__Pancan	KMT5A__Pancan	1.04380738239232	0.848297443790614
ASCC2	IC9	Pancan	additive	PTV_Misssense_CADD15	ASCC2__IC9__Pancan__PTV_Misssense_CADD15__additive	ASCC2__IC9__Pancan	ASCC2__Pancan	0.552170742524237	0.164060126797055
FANCC	IC9	Pancan	additive	PTV_Misssense_CADD15	FANCC__IC9__Pancan__PTV_Misssense_CADD15__additive	FANCC__IC9__Pancan	FANCC__Pancan	0.0646798966864595	0.378167785773342
MTOR	IC3	Prostate	additive	PTV_Misssense_CADD15	MTOR__IC3__Prostate__PTV_Misssense_CADD15__additive	MTOR__IC3__Prostate	MTOR__Prostate	0.610564595007632	0.484349251676144
TTI2	IC3	Prostate	additive	PTV_Misssense_CADD15	TTI2__IC3__Prostate__PTV_Misssense_CADD15__additive	TTI2__IC3__Prostate	TTI2__Prostate	1.1696008062683	2.08214259153797
EYA2	IC4	Prostate	additive	PTV_Misssense_CADD15	EYA2__IC4__Prostate__PTV_Misssense_CADD15__additive	EYA2__IC4__Prostate	EYA2__Prostate	0.970435149069571	0.692300585304604
KANSL3	IC13	Skin	additive	PTV_Misssense_CADD15	KANSL3__IC13__Skin__PTV_Misssense_CADD15__additive	KANSL3__IC13__Skin	KANSL3__Skin	1.24667569828384	2.18460314651347
ASCC3	IC3	Stomach_Eso	additive	PTV_Misssense_CADD15	ASCC3__IC3__Stomach_Eso__PTV_Misssense_CADD15__additive	ASCC3__IC3__Stomach_Eso	ASCC3__Stomach_Eso	2.5741373495586	0.126960943447236
KMT2D	IC3	Stomach_Eso	additive	PTV_Misssense_CADD15	KMT2D__IC3__Stomach_Eso__PTV_Misssense_CADD15__additive	KMT2D__IC3__Stomach_Eso	KMT2D__Stomach_Eso	1.17633253946538	0.315445330724592
BRCA2	VAE_depth1_6	Breast	additive	PTV_Misssense_CADD15	BRCA2__VAE_depth1_6__Breast__PTV_Misssense_CADD15__additive	BRCA2__VAE_depth1_6__Breast	BRCA2__Breast	2.2638767078137	2.57010747967012
BRCA2	VAE_depth1_8	Breast	additive	PTV_Misssense_CADD15	BRCA2__VAE_depth1_8__Breast__PTV_Misssense_CADD15__additive	BRCA2__VAE_depth1_8__Breast	BRCA2__Breast	3.45910357857824	3.52377256211766
DOCK8	VAE_depth1_9	Breast	additive	PTV_Misssense_CADD15	DOCK8__VAE_depth1_9__Breast__PTV_Misssense_CADD15__additive	DOCK8__VAE_depth1_9__Breast	DOCK8__Breast	1.04369529002121	0.194910436988376
SETD2	VAE_depth1_13	Colon_Rectum	additive	PTV_Misssense_CADD15	SETD2__VAE_depth1_13__Colon_Rectum__PTV_Misssense_CADD15__additive	SETD2__VAE_depth1_13__Colon_Rectum	SETD2__Colon_Rectum	5.32021695676272	4.788829584732
NCAPD2	VAE_depth1_1	Colon_Rectum	additive	PTV_Misssense_CADD15	NCAPD2__VAE_depth1_1__Colon_Rectum__PTV_Misssense_CADD15__additive	NCAPD2__VAE_depth1_1__Colon_Rectum	NCAPD2__Colon_Rectum	1.19416785806025	0.828502126185908
JADE2	VAE_depth1_8	Colon_Rectum	additive	PTV_Misssense_CADD15	JADE2__VAE_depth1_8__Colon_Rectum__PTV_Misssense_CADD15__additive	JADE2__VAE_depth1_8__Colon_Rectum	JADE2__Colon_Rectum	4.88985025869162	2.91390307463493
SMARCAL1	VAE_depth1_8	Brain_glioma_multi	additive	PTV_Misssense_CADD15	SMARCAL1__VAE_depth1_8__Brain_glioma_multi__PTV_Misssense_CADD15__additive	SMARCAL1__VAE_depth1_8__Brain_glioma_multi	SMARCAL1__Brain_glioma_multi	3.25743763874527	1.5775869426779
ANKRD28	VAE_depth1_2	Kidney	additive	PTV_Misssense_CADD15	ANKRD28__VAE_depth1_2__Kidney__PTV_Misssense_CADD15__additive	ANKRD28__VAE_depth1_2__Kidney	ANKRD28__Kidney	2.60498927703303	3.1853765829952
KDM6B	VAE_depth1_2	Kidney	additive	PTV_Misssense_CADD15	KDM6B__VAE_depth1_2__Kidney__PTV_Misssense_CADD15__additive	KDM6B__VAE_depth1_2__Kidney	KDM6B__Kidney	2.91606806847286	2.9592400382716
REV3L	VAE_depth1_7	Kidney	additive	PTV_Misssense_CADD15	REV3L__VAE_depth1_7__Kidney__PTV_Misssense_CADD15__additive	REV3L__VAE_depth1_7__Kidney	REV3L__Kidney	2.70109034785574	2.44480307489558
PRMT7	VAE_depth1_1	Brain_glioma_low	additive	PTV_Misssense_CADD15	PRMT7__VAE_depth1_1__Brain_glioma_low__PTV_Misssense_CADD15__additive	PRMT7__VAE_depth1_1__Brain_glioma_low	PRMT7__Brain_glioma_low	1.02328096214485	0.926599656107404
KANSL1	VAE_depth1_13	Lung_ad	additive	PTV_Misssense_CADD15	KANSL1__VAE_depth1_13__Lung_ad__PTV_Misssense_CADD15__additive	KANSL1__VAE_depth1_13__Lung_ad	KANSL1__Lung_ad	0.975994867360565	1.61203193311762
MSL2	VAE_depth1_12	Lung_sq	additive	PTV_Misssense_CADD15	MSL2__VAE_depth1_12__Lung_sq__PTV_Misssense_CADD15__additive	MSL2__VAE_depth1_12__Lung_sq	MSL2__Lung_sq	3.50936670284741	5.38972034939068
BRCA2	VAE_depth1_2	Pancan	additive	PTV_Misssense_CADD15	BRCA2__VAE_depth1_2__Pancan__PTV_Misssense_CADD15__additive	BRCA2__VAE_depth1_2__Pancan	BRCA2__Pancan	0.210706029581738	0.97547429753135
BRCA1	VAE_depth1_6	Pancan	additive	PTV_Misssense_CADD15	BRCA1__VAE_depth1_6__Pancan__PTV_Misssense_CADD15__additive	BRCA1__VAE_depth1_6__Pancan	BRCA1__Pancan	1.62454148084554	0.931517252260994
BRCA2	VAE_depth1_6	Pancan	additive	PTV_Misssense_CADD15	BRCA2__VAE_depth1_6__Pancan__PTV_Misssense_CADD15__additive	BRCA2__VAE_depth1_6__Pancan	BRCA2__Pancan	1.06510902030284	1.51994322662246
PALB2	VAE_depth1_6	Pancan	additive	PTV_Misssense_CADD15	PALB2__VAE_depth1_6__Pancan__PTV_Misssense_CADD15__additive	PALB2__VAE_depth1_6__Pancan	PALB2__Pancan	1.73994212678074	0.932965951866453
BRCA1	VAE_depth1_8	Pancan	additive	PTV_Misssense_CADD15	BRCA1__VAE_depth1_8__Pancan__PTV_Misssense_CADD15__additive	BRCA1__VAE_depth1_8__Pancan	BRCA1__Pancan	1.5177386920626	1.80951609952689
BRCA2	VAE_depth1_8	Pancan	additive	PTV_Misssense_CADD15	BRCA2__VAE_depth1_8__Pancan__PTV_Misssense_CADD15__additive	BRCA2__VAE_depth1_8__Pancan	BRCA2__Pancan	1.6566633232668	2.42764751248111
PALB2	VAE_depth1_8	Pancan	additive	PTV_Misssense_CADD15	PALB2__VAE_depth1_8__Pancan__PTV_Misssense_CADD15__additive	PALB2__VAE_depth1_8__Pancan	PALB2__Pancan	1.51095632137703	1.53236730045256
VPS72	VAE_depth1_11	Prostate	additive	PTV_Misssense_CADD15	VPS72__VAE_depth1_11__Prostate__PTV_Misssense_CADD15__additive	VPS72__VAE_depth1_11__Prostate	VPS72__Prostate	1.82050241201493	1.12660846776809
MTOR	VAE_depth1_13	Prostate	additive	PTV_Misssense_CADD15	MTOR__VAE_depth1_13__Prostate__PTV_Misssense_CADD15__additive	MTOR__VAE_depth1_13__Prostate	MTOR__Prostate	2.50130108521933	1.70892928954411
EYA2	VAE_depth1_8	Prostate	additive	PTV_Misssense_CADD15	EYA2__VAE_depth1_8__Prostate__PTV_Misssense_CADD15__additive	EYA2__VAE_depth1_8__Prostate	EYA2__Prostate	3.39084957277288	2.25750244893104
EXO1	VAE_depth1_10	Skin	additive	PTV_Misssense_CADD15	EXO1__VAE_depth1_10__Skin__PTV_Misssense_CADD15__additive	EXO1__VAE_depth1_10__Skin	EXO1__Skin	1.61050569010332	1.93125931451785
TP53BP1	VAE_depth1_1	Skin	additive	PTV_Misssense_CADD15	TP53BP1__VAE_depth1_1__Skin__PTV_Misssense_CADD15__additive	TP53BP1__VAE_depth1_1__Skin	TP53BP1__Skin	0.659555025483416	1.31532006752808
EXO1	VAE_depth1_6	Skin	additive	PTV_Misssense_CADD15	EXO1__VAE_depth1_6__Skin__PTV_Misssense_CADD15__additive	EXO1__VAE_depth1_6__Skin	EXO1__Skin	3.02450529671622	1.69786201156163
PAXIP1	VAE_depth1_6	Skin	additive	PTV_Misssense_CADD15	PAXIP1__VAE_depth1_6__Skin__PTV_Misssense_CADD15__additive	PAXIP1__VAE_depth1_6__Skin	PAXIP1__Skin	1.34072116622562	1.87964560682305
RIF1	VAE_depth1_6	Skin	additive	PTV_Misssense_CADD15	RIF1__VAE_depth1_6__Skin__PTV_Misssense_CADD15__additive	RIF1__VAE_depth1_6__Skin	RIF1__Skin	0.915552392205968	0.678896499287049
MTOR	VAE_depth1_13	Stomach_Eso	additive	PTV_Misssense_CADD15	MTOR__VAE_depth1_13__Stomach_Eso__PTV_Misssense_CADD15__additive	MTOR__VAE_depth1_13__Stomach_Eso	MTOR__Stomach_Eso	6.03767005757001	0.643585441675337
APEX1	VAE_depth1_1	Stomach_Eso	additive	PTV_Misssense_CADD15	APEX1__VAE_depth1_1__Stomach_Eso__PTV_Misssense_CADD15__additive	APEX1__VAE_depth1_1__Stomach_Eso	APEX1__Stomach_Eso	4.79038580434975	6.51159808012382
BRCA1	IC12	Breast	additive	PTV_Misssense_CADD25	BRCA1__IC12__Breast__PTV_Misssense_CADD25__additive	BRCA1__IC12__Breast	BRCA1__Breast	0.161572567109702	0.206708305603031
BRCA1	IC2	Breast	additive	PTV_Misssense_CADD25	BRCA1__IC2__Breast__PTV_Misssense_CADD25__additive	BRCA1__IC2__Breast	BRCA1__Breast	0.558271137319677	0.792373400095639
BRCA1	IC4	Breast	additive	PTV_Misssense_CADD25	BRCA1__IC4__Breast__PTV_Misssense_CADD25__additive	BRCA1__IC4__Breast	BRCA1__Breast	0.914688083655651	1.15559188026496
BRCA2	IC4	Breast	additive	PTV_Misssense_CADD25	BRCA2__IC4__Breast__PTV_Misssense_CADD25__additive	BRCA2__IC4__Breast	BRCA2__Breast	1.33260145032572	1.5578219610937
TIMELESS	IC4	Brain_glioma_multi	additive	PTV_Misssense_CADD25	TIMELESS__IC4__Brain_glioma_multi__PTV_Misssense_CADD25__additive	TIMELESS__IC4__Brain_glioma_multi	TIMELESS__Brain_glioma_multi	1.28430961755444	1.14155908595429
SMC1B	IC13	Pancan	additive	PTV_Misssense_CADD25	SMC1B__IC13__Pancan__PTV_Misssense_CADD25__additive	SMC1B__IC13__Pancan	SMC1B__Pancan	0.31163443056982	0.493978139378377
APC	IC14	Pancan	additive	PTV_Misssense_CADD25	APC__IC14__Pancan__PTV_Misssense_CADD25__additive	APC__IC14__Pancan	APC__Pancan	-0.0457627246029985	-0.361315785392607
BRCA1	IC2	Pancan	additive	PTV_Misssense_CADD25	BRCA1__IC2__Pancan__PTV_Misssense_CADD25__additive	BRCA1__IC2__Pancan	BRCA1__Pancan	0.300106617715846	0.360946885001304
MLH1	IC3	Pancan	additive	PTV_Misssense_CADD25	MLH1__IC3__Pancan__PTV_Misssense_CADD25__additive	MLH1__IC3__Pancan	MLH1__Pancan	0.303913321136621	0.849185927796655
MSH2	IC3	Pancan	additive	PTV_Misssense_CADD25	MSH2__IC3__Pancan__PTV_Misssense_CADD25__additive	MSH2__IC3__Pancan	MSH2__Pancan	0.868101633196946	0.396731787315774
BRCA1	IC4	Pancan	additive	PTV_Misssense_CADD25	BRCA1__IC4__Pancan__PTV_Misssense_CADD25__additive	BRCA1__IC4__Pancan	BRCA1__Pancan	0.650386894669093	0.983140411509353
BRCA2	IC4	Pancan	additive	PTV_Misssense_CADD25	BRCA2__IC4__Pancan__PTV_Misssense_CADD25__additive	BRCA2__IC4__Pancan	BRCA2__Pancan	0.877391003212099	1.18484794978755
PALB2	IC4	Pancan	additive	PTV_Misssense_CADD25	PALB2__IC4__Pancan__PTV_Misssense_CADD25__additive	PALB2__IC4__Pancan	PALB2__Pancan	0.826355808741702	1.35802056149997
BRCA2	IC8	Pancan	additive	PTV_Misssense_CADD25	BRCA2__IC8__Pancan__PTV_Misssense_CADD25__additive	BRCA2__IC8__Pancan	BRCA2__Pancan	-0.0657177735218786	-0.377421763825805
ASCC2	IC9	Pancan	additive	PTV_Misssense_CADD25	ASCC2__IC9__Pancan__PTV_Misssense_CADD25__additive	ASCC2__IC9__Pancan	ASCC2__Pancan	0.771836987288743	0.451242042889445
POT1	IC9	Pancan	additive	PTV_Misssense_CADD25	POT1__IC9__Pancan__PTV_Misssense_CADD25__additive	POT1__IC9__Pancan	POT1__Pancan	0.496047521862196	0.579788376362452
EYA2	IC4	Prostate	additive	PTV_Misssense_CADD25	EYA2__IC4__Prostate__PTV_Misssense_CADD25__additive	EYA2__IC4__Prostate	EYA2__Prostate	1.12179834539369	1.60888290211192
BRCA1	VAE_depth1_12	Breast	additive	PTV_Misssense_CADD25	BRCA1__VAE_depth1_12__Breast__PTV_Misssense_CADD25__additive	BRCA1__VAE_depth1_12__Breast	BRCA1__Breast	-1.07938089121591	-2.14200347649147
BRCA1	VAE_depth1_6	Breast	additive	PTV_Misssense_CADD25	BRCA1__VAE_depth1_6__Breast__PTV_Misssense_CADD25__additive	BRCA1__VAE_depth1_6__Breast	BRCA1__Breast	3.35179236691048	1.95991224599804
BRCA2	VAE_depth1_6	Breast	additive	PTV_Misssense_CADD25	BRCA2__VAE_depth1_6__Breast__PTV_Misssense_CADD25__additive	BRCA2__VAE_depth1_6__Breast	BRCA2__Breast	3.25053281407073	3.05937706400878
BRCA1	VAE_depth1_8	Breast	additive	PTV_Misssense_CADD25	BRCA1__VAE_depth1_8__Breast__PTV_Misssense_CADD25__additive	BRCA1__VAE_depth1_8__Breast	BRCA1__Breast	2.19883669589757	3.7576104088001
BRCA2	VAE_depth1_8	Breast	additive	PTV_Misssense_CADD25	BRCA2__VAE_depth1_8__Breast__PTV_Misssense_CADD25__additive	BRCA2__VAE_depth1_8__Breast	BRCA2__Breast	4.20414745038349	4.03703921404635
NCAPD2	VAE_depth1_1	Colon_Rectum	additive	PTV_Misssense_CADD25	NCAPD2__VAE_depth1_1__Colon_Rectum__PTV_Misssense_CADD25__additive	NCAPD2__VAE_depth1_1__Colon_Rectum	NCAPD2__Colon_Rectum	2.59052103082849	0.898824743406756
BRCA1	VAE_depth1_8	Colon_Rectum	additive	PTV_Misssense_CADD25	BRCA1__VAE_depth1_8__Colon_Rectum__PTV_Misssense_CADD25__additive	BRCA1__VAE_depth1_8__Colon_Rectum	BRCA1__Colon_Rectum	4.45638378422809	1.73072860641387
TIMELESS	VAE_depth1_8	Brain_glioma_multi	additive	PTV_Misssense_CADD25	TIMELESS__VAE_depth1_8__Brain_glioma_multi__PTV_Misssense_CADD25__additive	TIMELESS__VAE_depth1_8__Brain_glioma_multi	TIMELESS__Brain_glioma_multi	3.72407460689506	3.64992228161851
MSH2	VAE_depth1_13	Pancan	additive	PTV_Misssense_CADD25	MSH2__VAE_depth1_13__Pancan__PTV_Misssense_CADD25__additive	MSH2__VAE_depth1_13__Pancan	MSH2__Pancan	2.75744964813912	1.48657503860029
CCNA1	VAE_depth1_2	Pancan	additive	PTV_Misssense_CADD25	CCNA1__VAE_depth1_2__Pancan__PTV_Misssense_CADD25__additive	CCNA1__VAE_depth1_2__Pancan	CCNA1__Pancan	5.11348014699281	2.61219918241869
BRCA1	VAE_depth1_6	Pancan	additive	PTV_Misssense_CADD25	BRCA1__VAE_depth1_6__Pancan__PTV_Misssense_CADD25__additive	BRCA1__VAE_depth1_6__Pancan	BRCA1__Pancan	2.0772249565009	1.58455487231484
BRCA2	VAE_depth1_6	Pancan	additive	PTV_Misssense_CADD25	BRCA2__VAE_depth1_6__Pancan__PTV_Misssense_CADD25__additive	BRCA2__VAE_depth1_6__Pancan	BRCA2__Pancan	2.12956196163085	2.17828575815064
PALB2	VAE_depth1_6	Pancan	additive	PTV_Misssense_CADD25	PALB2__VAE_depth1_6__Pancan__PTV_Misssense_CADD25__additive	PALB2__VAE_depth1_6__Pancan	PALB2__Pancan	1.83500610725609	2.1228934782415
BRCA1	VAE_depth1_8	Pancan	additive	PTV_Misssense_CADD25	BRCA1__VAE_depth1_8__Pancan__PTV_Misssense_CADD25__additive	BRCA1__VAE_depth1_8__Pancan	BRCA1__Pancan	1.68581340017325	3.23795016478981
BRCA2	VAE_depth1_8	Pancan	additive	PTV_Misssense_CADD25	BRCA2__VAE_depth1_8__Pancan__PTV_Misssense_CADD25__additive	BRCA2__VAE_depth1_8__Pancan	BRCA2__Pancan	2.72884769990359	3.07049824760338
DNMT1	VAE_depth1_8	Pancan	additive	PTV_Misssense_CADD25	DNMT1__VAE_depth1_8__Pancan__PTV_Misssense_CADD25__additive	DNMT1__VAE_depth1_8__Pancan	DNMT1__Pancan	2.81670844889105	1.63616433736978
PALB2	VAE_depth1_8	Pancan	additive	PTV_Misssense_CADD25	PALB2__VAE_depth1_8__Pancan__PTV_Misssense_CADD25__additive	PALB2__VAE_depth1_8__Pancan	PALB2__Pancan	2.36638693085748	3.7832568300471
EYA2	VAE_depth1_8	Prostate	additive	PTV_Misssense_CADD25	EYA2__VAE_depth1_8__Prostate__PTV_Misssense_CADD25__additive	EYA2__VAE_depth1_8__Prostate	EYA2__Prostate	3.93650555148746	5.39835026352718
WRN	VAE_depth1_8	Prostate	additive	PTV_Misssense_CADD25	WRN__VAE_depth1_8__Prostate__PTV_Misssense_CADD25__additive	WRN__VAE_depth1_8__Prostate	WRN__Prostate	3.97313861530941	2.08418798344983
EXO1	VAE_depth1_10	Skin	additive	PTV_Misssense_CADD25	EXO1__VAE_depth1_10__Skin__PTV_Misssense_CADD25__additive	EXO1__VAE_depth1_10__Skin	EXO1__Skin	2.23919683963199	3.3617392742016
ATR	VAE_depth1_3	Skin	additive	PTV_Misssense_CADD25	ATR__VAE_depth1_3__Skin__PTV_Misssense_CADD25__additive	ATR__VAE_depth1_3__Skin	ATR__Skin	0.989078701903588	1.11359192333165
ATR	VAE_depth1_4	Skin	additive	PTV_Misssense_CADD25	ATR__VAE_depth1_4__Skin__PTV_Misssense_CADD25__additive	ATR__VAE_depth1_4__Skin	ATR__Skin	1.14131982199547	1.77548688291696
EXO1	VAE_depth1_6	Skin	additive	PTV_Misssense_CADD25	EXO1__VAE_depth1_6__Skin__PTV_Misssense_CADD25__additive	EXO1__VAE_depth1_6__Skin	EXO1__Skin	4.08443203897525	2.95501777397377
PRPF19	IC5	Pancan	dominant	Misssense_CCR	PRPF19__IC5__Pancan__Misssense_CCR__dominant	PRPF19__IC5__Pancan	PRPF19__Pancan	2.15904243786464	2.06894422044362
KMT2B	VAE_depth1_2	Lung_ad	dominant	Misssense_CCR	KMT2B__VAE_depth1_2__Lung_ad__Misssense_CCR__dominant	KMT2B__VAE_depth1_2__Lung_ad	KMT2B__Lung_ad	2.73919599893598	2.70972028343428
SETD1A	IC3	Breast	dominant	Misssense_MTR	SETD1A__IC3__Breast__Misssense_MTR__dominant	SETD1A__IC3__Breast	SETD1A__Breast	1.85670058868802	1.59009516224601
TRRAP	IC4	Breast	dominant	Misssense_MTR	TRRAP__IC4__Breast__Misssense_MTR__dominant	TRRAP__IC4__Breast	TRRAP__Breast	2.76453144287219	2.24695535733754
HERC2	IC13	Ovary	dominant	Misssense_MTR	HERC2__IC13__Ovary__Misssense_MTR__dominant	HERC2__IC13__Ovary	HERC2__Ovary	1.17818232377352	2.40249975452106
RECQL	IC4	Pancan	dominant	Misssense_MTR	RECQL__IC4__Pancan__Misssense_MTR__dominant	RECQL__IC4__Pancan	RECQL__Pancan	0.30337625713895	0.721525207022183
ACTL6A	IC8	Pancan	dominant	Misssense_MTR	ACTL6A__IC8__Pancan__Misssense_MTR__dominant	ACTL6A__IC8__Pancan	ACTL6A__Pancan	-0.625787910444244	-1.313296695093
TOP2A	IC8	Pancan	dominant	Misssense_MTR	TOP2A__IC8__Pancan__Misssense_MTR__dominant	TOP2A__IC8__Pancan	TOP2A__Pancan	-0.971384212645418	-1.24152998276578
ASCC2	IC9	Pancan	dominant	Misssense_MTR	ASCC2__IC9__Pancan__Misssense_MTR__dominant	ASCC2__IC9__Pancan	ASCC2__Pancan	0.632856280694445	1.16587364950634
MDN1	IC9	Pancan	dominant	Misssense_MTR	MDN1__IC9__Pancan__Misssense_MTR__dominant	MDN1__IC9__Pancan	MDN1__Pancan	0.231932695973243	0.0302799007912847
NCAPG2	IC9	Pancan	dominant	Misssense_MTR	NCAPG2__IC9__Pancan__Misssense_MTR__dominant	NCAPG2__IC9__Pancan	NCAPG2__Pancan	0.752079001316234	0.862632590361967
NUDT7	IC9	Pancan	dominant	Misssense_MTR	NUDT7__IC9__Pancan__Misssense_MTR__dominant	NUDT7__IC9__Pancan	NUDT7__Pancan	0.561944138465241	0.855720141456024
POT1	IC9	Pancan	dominant	Misssense_MTR	POT1__IC9__Pancan__Misssense_MTR__dominant	POT1__IC9__Pancan	POT1__Pancan	0.408091904940947	0.481922654861836
SETD1A	VAE_depth1_13	Breast	dominant	Misssense_MTR	SETD1A__VAE_depth1_13__Breast__Misssense_MTR__dominant	SETD1A__VAE_depth1_13__Breast	SETD1A__Breast	4.63446174005574	3.71333862706767
MDN1	VAE_depth1_3	Colon_Rectum	dominant	Misssense_MTR	MDN1__VAE_depth1_3__Colon_Rectum__Misssense_MTR__dominant	MDN1__VAE_depth1_3__Colon_Rectum	MDN1__Colon_Rectum	1.95351895725023	2.43119132336108
MSH2	VAE_depth1_13	Pancan	dominant	Misssense_MTR	MSH2__VAE_depth1_13__Pancan__Misssense_MTR__dominant	MSH2__VAE_depth1_13__Pancan	MSH2__Pancan	2.95353142364505	2.25255241128457
HMG20B	VAE_depth1_2	Pancan	dominant	Misssense_MTR	HMG20B__VAE_depth1_2__Pancan__Misssense_MTR__dominant	HMG20B__VAE_depth1_2__Pancan	HMG20B__Pancan	3.43291223743731	2.26753386536022
BRCA1	IC12	Breast	dominant	PTV	BRCA1__IC12__Breast__PTV__dominant	BRCA1__IC12__Breast	BRCA1__Breast	0.376062064504497	0.302499331653128
BRCA1	IC2	Breast	dominant	PTV	BRCA1__IC2__Breast__PTV__dominant	BRCA1__IC2__Breast	BRCA1__Breast	1.05804077056899	1.41175703245885
BRCA1	IC4	Breast	dominant	PTV	BRCA1__IC4__Breast__PTV__dominant	BRCA1__IC4__Breast	BRCA1__Breast	1.50848098721206	2.03021133649916
BRCA2	IC4	Breast	dominant	PTV	BRCA2__IC4__Breast__PTV__dominant	BRCA2__IC4__Breast	BRCA2__Breast	2.34031639614576	2.86591065683411
BRCA1	IC2	Pancan	dominant	PTV	BRCA1__IC2__Pancan__PTV__dominant	BRCA1__IC2__Pancan	BRCA1__Pancan	0.334525030923771	0.772155431476743
MLH1	IC3	Pancan	dominant	PTV	MLH1__IC3__Pancan__PTV__dominant	MLH1__IC3__Pancan	MLH1__Pancan	4.25622458130633	4.18137876958836
MSH2	IC3	Pancan	dominant	PTV	MSH2__IC3__Pancan__PTV__dominant	MSH2__IC3__Pancan	MSH2__Pancan	2.41353640876756	0.880252434083853
BRCA1	IC4	Pancan	dominant	PTV	BRCA1__IC4__Pancan__PTV__dominant	BRCA1__IC4__Pancan	BRCA1__Pancan	0.939869966855976	1.8831953328142
BRCA2	IC4	Pancan	dominant	PTV	BRCA2__IC4__Pancan__PTV__dominant	BRCA2__IC4__Pancan	BRCA2__Pancan	1.78664454243696	2.17218217945136
PALB2	IC4	Pancan	dominant	PTV	PALB2__IC4__Pancan__PTV__dominant	PALB2__IC4__Pancan	PALB2__Pancan	1.81067876650097	1.79642508429663
PIF1	IC9	Pancan	dominant	PTV	PIF1__IC9__Pancan__PTV__dominant	PIF1__IC9__Pancan	PIF1__Pancan	0.897011639177701	0.396530190412376
BRCA2	VAE_depth1_6	Breast	dominant	PTV	BRCA2__VAE_depth1_6__Breast__PTV__dominant	BRCA2__VAE_depth1_6__Breast	BRCA2__Breast	5.47844877552357	5.86486242078821
BRCA2	VAE_depth1_8	Breast	dominant	PTV	BRCA2__VAE_depth1_8__Breast__PTV__dominant	BRCA2__VAE_depth1_8__Breast	BRCA2__Breast	6.88775261369099	7.31307415074834
MLH1	VAE_depth1_10	Pancan	dominant	PTV	MLH1__VAE_depth1_10__Pancan__PTV__dominant	MLH1__VAE_depth1_10__Pancan	MLH1__Pancan	7.19153672487045	6.34545139757884
MDN1	VAE_depth1_13	Pancan	dominant	PTV	MDN1__VAE_depth1_13__Pancan__PTV__dominant	MDN1__VAE_depth1_13__Pancan	MDN1__Pancan	1.99377499606458	0.561779988552452
MLH1	VAE_depth1_13	Pancan	dominant	PTV	MLH1__VAE_depth1_13__Pancan__PTV__dominant	MLH1__VAE_depth1_13__Pancan	MLH1__Pancan	11.4078055858746	14.1977148157744
MSH2	VAE_depth1_13	Pancan	dominant	PTV	MSH2__VAE_depth1_13__Pancan__PTV__dominant	MSH2__VAE_depth1_13__Pancan	MSH2__Pancan	7.28825275779019	3.5746839635975
BRCA2	VAE_depth1_1	Pancan	dominant	PTV	BRCA2__VAE_depth1_1__Pancan__PTV__dominant	BRCA2__VAE_depth1_1__Pancan	BRCA2__Pancan	0.981594170918565	1.99151905594668
BRCA1	VAE_depth1_6	Pancan	dominant	PTV	BRCA1__VAE_depth1_6__Pancan__PTV__dominant	BRCA1__VAE_depth1_6__Pancan	BRCA1__Pancan	3.12657753782918	2.8444772390087
BRCA2	VAE_depth1_6	Pancan	dominant	PTV	BRCA2__VAE_depth1_6__Pancan__PTV__dominant	BRCA2__VAE_depth1_6__Pancan	BRCA2__Pancan	4.30618112609882	4.08273318625233
PALB2	VAE_depth1_6	Pancan	dominant	PTV	PALB2__VAE_depth1_6__Pancan__PTV__dominant	PALB2__VAE_depth1_6__Pancan	PALB2__Pancan	3.68678037402986	3.3042161648333
ATR	VAE_depth1_8	Pancan	dominant	PTV	ATR__VAE_depth1_8__Pancan__PTV__dominant	ATR__VAE_depth1_8__Pancan	ATR__Pancan	1.30968148136396	7.5681743701708
BRCA1	VAE_depth1_8	Pancan	dominant	PTV	BRCA1__VAE_depth1_8__Pancan__PTV__dominant	BRCA1__VAE_depth1_8__Pancan	BRCA1__Pancan	2.7285295035388	6.28541945207573
BRCA2	VAE_depth1_8	Pancan	dominant	PTV	BRCA2__VAE_depth1_8__Pancan__PTV__dominant	BRCA2__VAE_depth1_8__Pancan	BRCA2__Pancan	5.47521136725446	5.52896558013195
PALB2	VAE_depth1_8	Pancan	dominant	PTV	PALB2__VAE_depth1_8__Pancan__PTV__dominant	PALB2__VAE_depth1_8__Pancan	PALB2__Pancan	5.41380304727062	4.61561086622058
CHD3	IC13	Bladder	dominant	PTV_Misssense_CADD15	CHD3__IC13__Bladder__PTV_Misssense_CADD15__dominant	CHD3__IC13__Bladder	CHD3__Bladder	1.21572938189794	0.92010965024938
PALB2	IC10	Breast	dominant	PTV_Misssense_CADD15	PALB2__IC10__Breast__PTV_Misssense_CADD15__dominant	PALB2__IC10__Breast	PALB2__Breast	1.69375851043523	1.05382587185962
ELP2	IC13	Breast	dominant	PTV_Misssense_CADD15	ELP2__IC13__Breast__PTV_Misssense_CADD15__dominant	ELP2__IC13__Breast	ELP2__Breast	1.57581816702528	1.11322719884358
EP300	IC13	Breast	dominant	PTV_Misssense_CADD15	EP300__IC13__Breast__PTV_Misssense_CADD15__dominant	EP300__IC13__Breast	EP300__Breast	0.2377400140413	0.479230779558639
NFRKB	IC1	Breast	dominant	PTV_Misssense_CADD15	NFRKB__IC1__Breast__PTV_Misssense_CADD15__dominant	NFRKB__IC1__Breast	NFRKB__Breast	0.37542771380339	0.0313380892637477
BRCA1	IC2	Breast	dominant	PTV_Misssense_CADD15	BRCA1__IC2__Breast__PTV_Misssense_CADD15__dominant	BRCA1__IC2__Breast	BRCA1__Breast	0.349625922271777	0.485967079281354
APC	IC3	Breast	dominant	PTV_Misssense_CADD15	APC__IC3__Breast__PTV_Misssense_CADD15__dominant	APC__IC3__Breast	APC__Breast	0.208467964098241	0.187557196408554
SETD1A	IC3	Breast	dominant	PTV_Misssense_CADD15	SETD1A__IC3__Breast__PTV_Misssense_CADD15__dominant	SETD1A__IC3__Breast	SETD1A__Breast	0.540445626901936	0.210326791748615
BRCA2	IC4	Breast	dominant	PTV_Misssense_CADD15	BRCA2__IC4__Breast__PTV_Misssense_CADD15__dominant	BRCA2__IC4__Breast	BRCA2__Breast	1.29070713977866	2.15673763411134
MLH1	IC3	Colon_Rectum	dominant	PTV_Misssense_CADD15	MLH1__IC3__Colon_Rectum__PTV_Misssense_CADD15__dominant	MLH1__IC3__Colon_Rectum	MLH1__Colon_Rectum	2.95007225934866	0.725488263453981
MDN1	IC3	Brain_glioma_multi	dominant	PTV_Misssense_CADD15	MDN1__IC3__Brain_glioma_multi__PTV_Misssense_CADD15__dominant	MDN1__IC3__Brain_glioma_multi	MDN1__Brain_glioma_multi	0.275109901890104	0.281952356517495
TELO2	IC3	Kidney	dominant	PTV_Misssense_CADD15	TELO2__IC3__Kidney__PTV_Misssense_CADD15__dominant	TELO2__IC3__Kidney	TELO2__Kidney	0.524281671712632	2.60326680102737
PIK3C2B	IC13	Lung_sq	dominant	PTV_Misssense_CADD15	PIK3C2B__IC13__Lung_sq__PTV_Misssense_CADD15__dominant	PIK3C2B__IC13__Lung_sq	PIK3C2B__Lung_sq	0.753270927699884	2.14633379347451
DIS3L2	IC13	Ovary	dominant	PTV_Misssense_CADD15	DIS3L2__IC13__Ovary__PTV_Misssense_CADD15__dominant	DIS3L2__IC13__Ovary	DIS3L2__Ovary	1.2225630126846	1.06494324330035
HERC2	IC13	Ovary	dominant	PTV_Misssense_CADD15	HERC2__IC13__Ovary__PTV_Misssense_CADD15__dominant	HERC2__IC13__Ovary	HERC2__Ovary	0.278155575409981	0.644986616406678
HERC2	IC14	Ovary	dominant	PTV_Misssense_CADD15	HERC2__IC14__Ovary__PTV_Misssense_CADD15__dominant	HERC2__IC14__Ovary	HERC2__Ovary	0.0107587090091695	0.118440993909341
TRRAP	IC3	Ovary	dominant	PTV_Misssense_CADD15	TRRAP__IC3__Ovary__PTV_Misssense_CADD15__dominant	TRRAP__IC3__Ovary	TRRAP__Ovary	0.331875396574012	0.504093732508481
KDM1A	IC13	Pancan	dominant	PTV_Misssense_CADD15	KDM1A__IC13__Pancan__PTV_Misssense_CADD15__dominant	KDM1A__IC13__Pancan	KDM1A__Pancan	0.794243101903691	0.973633792243258
MSH3	IC13	Pancan	dominant	PTV_Misssense_CADD15	MSH3__IC13__Pancan__PTV_Misssense_CADD15__dominant	MSH3__IC13__Pancan	MSH3__Pancan	0.219050633253872	0.252093714369197
PHF8	IC13	Pancan	dominant	PTV_Misssense_CADD15	PHF8__IC13__Pancan__PTV_Misssense_CADD15__dominant	PHF8__IC13__Pancan	PHF8__Pancan	1.15074688852663	0.378570437718145
RBBP5	IC13	Pancan	dominant	PTV_Misssense_CADD15	RBBP5__IC13__Pancan__PTV_Misssense_CADD15__dominant	RBBP5__IC13__Pancan	RBBP5__Pancan	0.718990233594492	1.59031483020183
SMC1B	IC13	Pancan	dominant	PTV_Misssense_CADD15	SMC1B__IC13__Pancan__PTV_Misssense_CADD15__dominant	SMC1B__IC13__Pancan	SMC1B__Pancan	0.274153760265513	0.0342790335684623
TOP3B	IC13	Pancan	dominant	PTV_Misssense_CADD15	TOP3B__IC13__Pancan__PTV_Misssense_CADD15__dominant	TOP3B__IC13__Pancan	TOP3B__Pancan	0.351841817034279	0.38873676519415
RAD51	IC14	Pancan	dominant	PTV_Misssense_CADD15	RAD51__IC14__Pancan__PTV_Misssense_CADD15__dominant	RAD51__IC14__Pancan	RAD51__Pancan	-0.516931251973892	-0.433691760313483
AXIN2	IC3	Pancan	dominant	PTV_Misssense_CADD15	AXIN2__IC3__Pancan__PTV_Misssense_CADD15__dominant	AXIN2__IC3__Pancan	AXIN2__Pancan	0.45867052750332	0.0474176050889816
MAD2L2	IC3	Pancan	dominant	PTV_Misssense_CADD15	MAD2L2__IC3__Pancan__PTV_Misssense_CADD15__dominant	MAD2L2__IC3__Pancan	MAD2L2__Pancan	0.564139370769678	0.573302324959182
MUS81	IC3	Pancan	dominant	PTV_Misssense_CADD15	MUS81__IC3__Pancan__PTV_Misssense_CADD15__dominant	MUS81__IC3__Pancan	MUS81__Pancan	0.27769522526991	0.189533259827318
BRCA1	IC4	Pancan	dominant	PTV_Misssense_CADD15	BRCA1__IC4__Pancan__PTV_Misssense_CADD15__dominant	BRCA1__IC4__Pancan	BRCA1__Pancan	0.624252344182439	0.563072299462322
BRCA2	IC4	Pancan	dominant	PTV_Misssense_CADD15	BRCA2__IC4__Pancan__PTV_Misssense_CADD15__dominant	BRCA2__IC4__Pancan	BRCA2__Pancan	0.531708119497491	1.035650544595
PALB2	IC4	Pancan	dominant	PTV_Misssense_CADD15	PALB2__IC4__Pancan__PTV_Misssense_CADD15__dominant	PALB2__IC4__Pancan	PALB2__Pancan	0.439389435358755	0.458494081247359
KMT5A	IC6	Pancan	dominant	PTV_Misssense_CADD15	KMT5A__IC6__Pancan__PTV_Misssense_CADD15__dominant	KMT5A__IC6__Pancan	KMT5A__Pancan	1.04380738239232	0.848297443790614
ASCC2	IC9	Pancan	dominant	PTV_Misssense_CADD15	ASCC2__IC9__Pancan__PTV_Misssense_CADD15__dominant	ASCC2__IC9__Pancan	ASCC2__Pancan	0.552170742524237	0.261047422051009
POT1	IC9	Pancan	dominant	PTV_Misssense_CADD15	POT1__IC9__Pancan__PTV_Misssense_CADD15__dominant	POT1__IC9__Pancan	POT1__Pancan	0.335161766823156	0.378223090313203
SOS1	IC9	Pancan	dominant	PTV_Misssense_CADD15	SOS1__IC9__Pancan__PTV_Misssense_CADD15__dominant	SOS1__IC9__Pancan	SOS1__Pancan	0.243238147311006	0.181205067338086
HERC2	IC3	Prostate	dominant	PTV_Misssense_CADD15	HERC2__IC3__Prostate__PTV_Misssense_CADD15__dominant	HERC2__IC3__Prostate	HERC2__Prostate	0.0902113803086382	0.884689169346272
MTOR	IC3	Prostate	dominant	PTV_Misssense_CADD15	MTOR__IC3__Prostate__PTV_Misssense_CADD15__dominant	MTOR__IC3__Prostate	MTOR__Prostate	0.610564595007632	0.484349251676144
TTI2	IC3	Prostate	dominant	PTV_Misssense_CADD15	TTI2__IC3__Prostate__PTV_Misssense_CADD15__dominant	TTI2__IC3__Prostate	TTI2__Prostate	1.1696008062683	2.08214259153797
EYA2	IC4	Prostate	dominant	PTV_Misssense_CADD15	EYA2__IC4__Prostate__PTV_Misssense_CADD15__dominant	EYA2__IC4__Prostate	EYA2__Prostate	0.970435149069571	0.692300585304604
EP300	IC13	Skin	dominant	PTV_Misssense_CADD15	EP300__IC13__Skin__PTV_Misssense_CADD15__dominant	EP300__IC13__Skin	EP300__Skin	0.578340502836084	0.758071543145725
KANSL3	IC13	Skin	dominant	PTV_Misssense_CADD15	KANSL3__IC13__Skin__PTV_Misssense_CADD15__dominant	KANSL3__IC13__Skin	KANSL3__Skin	1.24667569828384	2.18460314651347
PADI4	IC13	Skin	dominant	PTV_Misssense_CADD15	PADI4__IC13__Skin__PTV_Misssense_CADD15__dominant	PADI4__IC13__Skin	PADI4__Skin	0.847832510028125	1.36479883795583
ASCC3	IC3	Stomach_Eso	dominant	PTV_Misssense_CADD15	ASCC3__IC3__Stomach_Eso__PTV_Misssense_CADD15__dominant	ASCC3__IC3__Stomach_Eso	ASCC3__Stomach_Eso	2.5741373495586	0.126960943447236
KMT2D	IC3	Stomach_Eso	dominant	PTV_Misssense_CADD15	KMT2D__IC3__Stomach_Eso__PTV_Misssense_CADD15__dominant	KMT2D__IC3__Stomach_Eso	KMT2D__Stomach_Eso	1.17633253946538	0.315445330724592
BRCA2	VAE_depth1_6	Breast	dominant	PTV_Misssense_CADD15	BRCA2__VAE_depth1_6__Breast__PTV_Misssense_CADD15__dominant	BRCA2__VAE_depth1_6__Breast	BRCA2__Breast	2.51798313767153	4.31032962193147
BRCA2	VAE_depth1_8	Breast	dominant	PTV_Misssense_CADD15	BRCA2__VAE_depth1_8__Breast__PTV_Misssense_CADD15__dominant	BRCA2__VAE_depth1_8__Breast	BRCA2__Breast	4.18853447019434	5.81327703220704
SETD2	VAE_depth1_13	Colon_Rectum	dominant	PTV_Misssense_CADD15	SETD2__VAE_depth1_13__Colon_Rectum__PTV_Misssense_CADD15__dominant	SETD2__VAE_depth1_13__Colon_Rectum	SETD2__Colon_Rectum	5.32021695676272	4.788829584732
NCAPD2	VAE_depth1_1	Colon_Rectum	dominant	PTV_Misssense_CADD15	NCAPD2__VAE_depth1_1__Colon_Rectum__PTV_Misssense_CADD15__dominant	NCAPD2__VAE_depth1_1__Colon_Rectum	NCAPD2__Colon_Rectum	1.19416785806025	0.784626337614178
JADE2	VAE_depth1_8	Colon_Rectum	dominant	PTV_Misssense_CADD15	JADE2__VAE_depth1_8__Colon_Rectum__PTV_Misssense_CADD15__dominant	JADE2__VAE_depth1_8__Colon_Rectum	JADE2__Colon_Rectum	4.88985025869162	2.91390307463493
RBBP6	VAE_depth1_11	Brain_glioma_multi	dominant	PTV_Misssense_CADD15	RBBP6__VAE_depth1_11__Brain_glioma_multi__PTV_Misssense_CADD15__dominant	RBBP6__VAE_depth1_11__Brain_glioma_multi	RBBP6__Brain_glioma_multi	0.750487346403944	0.282007356020228
SMARCAL1	VAE_depth1_8	Brain_glioma_multi	dominant	PTV_Misssense_CADD15	SMARCAL1__VAE_depth1_8__Brain_glioma_multi__PTV_Misssense_CADD15__dominant	SMARCAL1__VAE_depth1_8__Brain_glioma_multi	SMARCAL1__Brain_glioma_multi	3.25743763874527	1.5775869426779
ANKRD28	VAE_depth1_2	Kidney	dominant	PTV_Misssense_CADD15	ANKRD28__VAE_depth1_2__Kidney__PTV_Misssense_CADD15__dominant	ANKRD28__VAE_depth1_2__Kidney	ANKRD28__Kidney	2.60498927703303	3.1853765829952
KDM6B	VAE_depth1_2	Kidney	dominant	PTV_Misssense_CADD15	KDM6B__VAE_depth1_2__Kidney__PTV_Misssense_CADD15__dominant	KDM6B__VAE_depth1_2__Kidney	KDM6B__Kidney	2.91606806847286	2.9592400382716
REV3L	VAE_depth1_7	Kidney	dominant	PTV_Misssense_CADD15	REV3L__VAE_depth1_7__Kidney__PTV_Misssense_CADD15__dominant	REV3L__VAE_depth1_7__Kidney	REV3L__Kidney	2.73650654374433	2.79056571583086
PRMT7	VAE_depth1_1	Brain_glioma_low	dominant	PTV_Misssense_CADD15	PRMT7__VAE_depth1_1__Brain_glioma_low__PTV_Misssense_CADD15__dominant	PRMT7__VAE_depth1_1__Brain_glioma_low	PRMT7__Brain_glioma_low	1.02328096214485	0.926599656107404
KANSL1	VAE_depth1_13	Lung_ad	dominant	PTV_Misssense_CADD15	KANSL1__VAE_depth1_13__Lung_ad__PTV_Misssense_CADD15__dominant	KANSL1__VAE_depth1_13__Lung_ad	KANSL1__Lung_ad	0.975994867360565	2.73775938557198
BRCA1	VAE_depth1_7	Lung_ad	dominant	PTV_Misssense_CADD15	BRCA1__VAE_depth1_7__Lung_ad__PTV_Misssense_CADD15__dominant	BRCA1__VAE_depth1_7__Lung_ad	BRCA1__Lung_ad	2.57087084849777	1.12181644430304
MSL2	VAE_depth1_12	Lung_sq	dominant	PTV_Misssense_CADD15	MSL2__VAE_depth1_12__Lung_sq__PTV_Misssense_CADD15__dominant	MSL2__VAE_depth1_12__Lung_sq	MSL2__Lung_sq	3.50936670284741	5.38972034939068
TRRAP	VAE_depth1_13	Ovary	dominant	PTV_Misssense_CADD15	TRRAP__VAE_depth1_13__Ovary__PTV_Misssense_CADD15__dominant	TRRAP__VAE_depth1_13__Ovary	TRRAP__Ovary	0.667275941996651	1.45413767293519
MSH2	VAE_depth1_13	Pancan	dominant	PTV_Misssense_CADD15	MSH2__VAE_depth1_13__Pancan__PTV_Misssense_CADD15__dominant	MSH2__VAE_depth1_13__Pancan	MSH2__Pancan	1.595314456065	0.392220006285466
BRCA1	VAE_depth1_6	Pancan	dominant	PTV_Misssense_CADD15	BRCA1__VAE_depth1_6__Pancan__PTV_Misssense_CADD15__dominant	BRCA1__VAE_depth1_6__Pancan	BRCA1__Pancan	1.84568816488567	0.949690015208439
BRCA2	VAE_depth1_6	Pancan	dominant	PTV_Misssense_CADD15	BRCA2__VAE_depth1_6__Pancan__PTV_Misssense_CADD15__dominant	BRCA2__VAE_depth1_6__Pancan	BRCA2__Pancan	1.06505031859667	1.78441619843785
BRCA1	VAE_depth1_8	Pancan	dominant	PTV_Misssense_CADD15	BRCA1__VAE_depth1_8__Pancan__PTV_Misssense_CADD15__dominant	BRCA1__VAE_depth1_8__Pancan	BRCA1__Pancan	1.77672414875177	1.96576311520641
BRCA2	VAE_depth1_8	Pancan	dominant	PTV_Misssense_CADD15	BRCA2__VAE_depth1_8__Pancan__PTV_Misssense_CADD15__dominant	BRCA2__VAE_depth1_8__Pancan	BRCA2__Pancan	1.59560815616644	2.80986880238324
PALB2	VAE_depth1_8	Pancan	dominant	PTV_Misssense_CADD15	PALB2__VAE_depth1_8__Pancan__PTV_Misssense_CADD15__dominant	PALB2__VAE_depth1_8__Pancan	PALB2__Pancan	1.13751286406392	1.13549372499434
VPS72	VAE_depth1_11	Prostate	dominant	PTV_Misssense_CADD15	VPS72__VAE_depth1_11__Prostate__PTV_Misssense_CADD15__dominant	VPS72__VAE_depth1_11__Prostate	VPS72__Prostate	1.82050241201493	1.12660846776809
MTOR	VAE_depth1_13	Prostate	dominant	PTV_Misssense_CADD15	MTOR__VAE_depth1_13__Prostate__PTV_Misssense_CADD15__dominant	MTOR__VAE_depth1_13__Prostate	MTOR__Prostate	2.50130108521933	1.70892928954411
EYA2	VAE_depth1_8	Prostate	dominant	PTV_Misssense_CADD15	EYA2__VAE_depth1_8__Prostate__PTV_Misssense_CADD15__dominant	EYA2__VAE_depth1_8__Prostate	EYA2__Prostate	3.39084957277288	2.25750244893104
EXO1	VAE_depth1_10	Skin	dominant	PTV_Misssense_CADD15	EXO1__VAE_depth1_10__Skin__PTV_Misssense_CADD15__dominant	EXO1__VAE_depth1_10__Skin	EXO1__Skin	1.15891890376622	1.93125931451785
PAXIP1	VAE_depth1_10	Skin	dominant	PTV_Misssense_CADD15	PAXIP1__VAE_depth1_10__Skin__PTV_Misssense_CADD15__dominant	PAXIP1__VAE_depth1_10__Skin	PAXIP1__Skin	1.34902715757497	2.31773324879114
KMT2E	VAE_depth1_12	Skin	dominant	PTV_Misssense_CADD15	KMT2E__VAE_depth1_12__Skin__PTV_Misssense_CADD15__dominant	KMT2E__VAE_depth1_12__Skin	KMT2E__Skin	0.217119808802107	2.08088669243559
SMC2	VAE_depth1_1	Skin	dominant	PTV_Misssense_CADD15	SMC2__VAE_depth1_1__Skin__PTV_Misssense_CADD15__dominant	SMC2__VAE_depth1_1__Skin	SMC2__Skin	2.05168430926993	1.76439311771222
EXO1	VAE_depth1_6	Skin	dominant	PTV_Misssense_CADD15	EXO1__VAE_depth1_6__Skin__PTV_Misssense_CADD15__dominant	EXO1__VAE_depth1_6__Skin	EXO1__Skin	2.35062366456075	1.69786201156163
PAXIP1	VAE_depth1_6	Skin	dominant	PTV_Misssense_CADD15	PAXIP1__VAE_depth1_6__Skin__PTV_Misssense_CADD15__dominant	PAXIP1__VAE_depth1_6__Skin	PAXIP1__Skin	2.18738611637488	1.87964560682305
RIF1	VAE_depth1_6	Skin	dominant	PTV_Misssense_CADD15	RIF1__VAE_depth1_6__Skin__PTV_Misssense_CADD15__dominant	RIF1__VAE_depth1_6__Skin	RIF1__Skin	0.915552392205968	0.678896499287049
MTOR	VAE_depth1_13	Stomach_Eso	dominant	PTV_Misssense_CADD15	MTOR__VAE_depth1_13__Stomach_Eso__PTV_Misssense_CADD15__dominant	MTOR__VAE_depth1_13__Stomach_Eso	MTOR__Stomach_Eso	6.03767005757001	0.643585441675337
APEX1	VAE_depth1_1	Stomach_Eso	dominant	PTV_Misssense_CADD15	APEX1__VAE_depth1_1__Stomach_Eso__PTV_Misssense_CADD15__dominant	APEX1__VAE_depth1_1__Stomach_Eso	APEX1__Stomach_Eso	4.79038580434975	6.51159808012382
BRCA1	IC12	Breast	dominant	PTV_Misssense_CADD25	BRCA1__IC12__Breast__PTV_Misssense_CADD25__dominant	BRCA1__IC12__Breast	BRCA1__Breast	0.289817265276107	0.403756557125691
BRCA1	IC2	Breast	dominant	PTV_Misssense_CADD25	BRCA1__IC2__Breast__PTV_Misssense_CADD25__dominant	BRCA1__IC2__Breast	BRCA1__Breast	0.889703736585872	1.25116911358135
BRCA1	IC4	Breast	dominant	PTV_Misssense_CADD25	BRCA1__IC4__Breast__PTV_Misssense_CADD25__dominant	BRCA1__IC4__Breast	BRCA1__Breast	1.61554902811443	2.05135440567445
BRCA2	IC4	Breast	dominant	PTV_Misssense_CADD25	BRCA2__IC4__Breast__PTV_Misssense_CADD25__dominant	BRCA2__IC4__Breast	BRCA2__Breast	1.7583535305245	2.90784143958931
TIMELESS	IC4	Brain_glioma_multi	dominant	PTV_Misssense_CADD25	TIMELESS__IC4__Brain_glioma_multi__PTV_Misssense_CADD25__dominant	TIMELESS__IC4__Brain_glioma_multi	TIMELESS__Brain_glioma_multi	1.28430961755444	1.14155908595429
MLH3	IC13	Pancan	dominant	PTV_Misssense_CADD25	MLH3__IC13__Pancan__PTV_Misssense_CADD25__dominant	MLH3__IC13__Pancan	MLH3__Pancan	0.519010381072368	0.984744001609553
APC	IC14	Pancan	dominant	PTV_Misssense_CADD25	APC__IC14__Pancan__PTV_Misssense_CADD25__dominant	APC__IC14__Pancan	APC__Pancan	-0.0624704813835517	-0.333802087978248
BRCA1	IC2	Pancan	dominant	PTV_Misssense_CADD25	BRCA1__IC2__Pancan__PTV_Misssense_CADD25__dominant	BRCA1__IC2__Pancan	BRCA1__Pancan	0.36864704488148	0.541730582350332
MLH1	IC3	Pancan	dominant	PTV_Misssense_CADD25	MLH1__IC3__Pancan__PTV_Misssense_CADD25__dominant	MLH1__IC3__Pancan	MLH1__Pancan	0.355640573151896	0.572254915244094
MSH2	IC3	Pancan	dominant	PTV_Misssense_CADD25	MSH2__IC3__Pancan__PTV_Misssense_CADD25__dominant	MSH2__IC3__Pancan	MSH2__Pancan	0.838552474743241	0.441923111210719
PARP3	IC3	Pancan	dominant	PTV_Misssense_CADD25	PARP3__IC3__Pancan__PTV_Misssense_CADD25__dominant	PARP3__IC3__Pancan	PARP3__Pancan	0.366333800996058	1.45538872100378
BRCA1	IC4	Pancan	dominant	PTV_Misssense_CADD25	BRCA1__IC4__Pancan__PTV_Misssense_CADD25__dominant	BRCA1__IC4__Pancan	BRCA1__Pancan	0.897214018829209	1.55510691456328
BRCA2	IC4	Pancan	dominant	PTV_Misssense_CADD25	BRCA2__IC4__Pancan__PTV_Misssense_CADD25__dominant	BRCA2__IC4__Pancan	BRCA2__Pancan	0.949444767589513	1.79530224147389
DNMT1	IC4	Pancan	dominant	PTV_Misssense_CADD25	DNMT1__IC4__Pancan__PTV_Misssense_CADD25__dominant	DNMT1__IC4__Pancan	DNMT1__Pancan	0.984622732507962	0.464039246403654
PALB2	IC4	Pancan	dominant	PTV_Misssense_CADD25	PALB2__IC4__Pancan__PTV_Misssense_CADD25__dominant	PALB2__IC4__Pancan	PALB2__Pancan	0.737342766712814	1.52975943143222
BRCA2	IC8	Pancan	dominant	PTV_Misssense_CADD25	BRCA2__IC8__Pancan__PTV_Misssense_CADD25__dominant	BRCA2__IC8__Pancan	BRCA2__Pancan	-0.145798737959333	-0.537222594087703
ASCC2	IC9	Pancan	dominant	PTV_Misssense_CADD25	ASCC2__IC9__Pancan__PTV_Misssense_CADD25__dominant	ASCC2__IC9__Pancan	ASCC2__Pancan	0.771836987288743	0.897434191268155
POT1	IC9	Pancan	dominant	PTV_Misssense_CADD25	POT1__IC9__Pancan__PTV_Misssense_CADD25__dominant	POT1__IC9__Pancan	POT1__Pancan	0.605215003542915	0.837863819860291
EYA2	IC4	Prostate	dominant	PTV_Misssense_CADD25	EYA2__IC4__Prostate__PTV_Misssense_CADD25__dominant	EYA2__IC4__Prostate	EYA2__Prostate	1.12179834539369	1.60888290211192
BRCA1	VAE_depth1_6	Breast	dominant	PTV_Misssense_CADD25	BRCA1__VAE_depth1_6__Breast__PTV_Misssense_CADD25__dominant	BRCA1__VAE_depth1_6__Breast	BRCA1__Breast	5.76559497277625	3.56531189751511
BRCA2	VAE_depth1_6	Breast	dominant	PTV_Misssense_CADD25	BRCA2__VAE_depth1_6__Breast__PTV_Misssense_CADD25__dominant	BRCA2__VAE_depth1_6__Breast	BRCA2__Breast	4.14865434953575	5.76537000973792
BRCA1	VAE_depth1_8	Breast	dominant	PTV_Misssense_CADD25	BRCA1__VAE_depth1_8__Breast__PTV_Misssense_CADD25__dominant	BRCA1__VAE_depth1_8__Breast	BRCA1__Breast	4.00953274638197	6.73001492678362
BRCA2	VAE_depth1_8	Breast	dominant	PTV_Misssense_CADD25	BRCA2__VAE_depth1_8__Breast__PTV_Misssense_CADD25__dominant	BRCA2__VAE_depth1_8__Breast	BRCA2__Breast	5.30301452293215	7.52837428048615
NCAPD2	VAE_depth1_1	Colon_Rectum	dominant	PTV_Misssense_CADD25	NCAPD2__VAE_depth1_1__Colon_Rectum__PTV_Misssense_CADD25__dominant	NCAPD2__VAE_depth1_1__Colon_Rectum	NCAPD2__Colon_Rectum	2.59052103082849	0.881120006673456
TIMELESS	VAE_depth1_8	Brain_glioma_multi	dominant	PTV_Misssense_CADD25	TIMELESS__VAE_depth1_8__Brain_glioma_multi__PTV_Misssense_CADD25__dominant	TIMELESS__VAE_depth1_8__Brain_glioma_multi	TIMELESS__Brain_glioma_multi	3.72407460689506	3.64992228161851
WRN	VAE_depth1_3	Lung_ad	dominant	PTV_Misssense_CADD25	WRN__VAE_depth1_3__Lung_ad__PTV_Misssense_CADD25__dominant	WRN__VAE_depth1_3__Lung_ad	WRN__Lung_ad	1.84630259633128	5.71786037733073
MSH2	VAE_depth1_13	Pancan	dominant	PTV_Misssense_CADD25	MSH2__VAE_depth1_13__Pancan__PTV_Misssense_CADD25__dominant	MSH2__VAE_depth1_13__Pancan	MSH2__Pancan	2.61825186650007	1.63587534700958
BRCA1	VAE_depth1_6	Pancan	dominant	PTV_Misssense_CADD25	BRCA1__VAE_depth1_6__Pancan__PTV_Misssense_CADD25__dominant	BRCA1__VAE_depth1_6__Pancan	BRCA1__Pancan	2.73704464234623	2.55050257276038
BRCA2	VAE_depth1_6	Pancan	dominant	PTV_Misssense_CADD25	BRCA2__VAE_depth1_6__Pancan__PTV_Misssense_CADD25__dominant	BRCA2__VAE_depth1_6__Pancan	BRCA2__Pancan	2.25151431595316	3.44306946486872
PALB2	VAE_depth1_6	Pancan	dominant	PTV_Misssense_CADD25	PALB2__VAE_depth1_6__Pancan__PTV_Misssense_CADD25__dominant	PALB2__VAE_depth1_6__Pancan	PALB2__Pancan	1.41700664670177	2.77073789922633
BRCA1	VAE_depth1_8	Pancan	dominant	PTV_Misssense_CADD25	BRCA1__VAE_depth1_8__Pancan__PTV_Misssense_CADD25__dominant	BRCA1__VAE_depth1_8__Pancan	BRCA1__Pancan	2.36793318193447	5.13382997943879
BRCA2	VAE_depth1_8	Pancan	dominant	PTV_Misssense_CADD25	BRCA2__VAE_depth1_8__Pancan__PTV_Misssense_CADD25__dominant	BRCA2__VAE_depth1_8__Pancan	BRCA2__Pancan	2.81338623768769	4.6218147113468
DNMT1	VAE_depth1_8	Pancan	dominant	PTV_Misssense_CADD25	DNMT1__VAE_depth1_8__Pancan__PTV_Misssense_CADD25__dominant	DNMT1__VAE_depth1_8__Pancan	DNMT1__Pancan	4.13836822455889	1.63616433736978
PALB2	VAE_depth1_8	Pancan	dominant	PTV_Misssense_CADD25	PALB2__VAE_depth1_8__Pancan__PTV_Misssense_CADD25__dominant	PALB2__VAE_depth1_8__Pancan	PALB2__Pancan	2.16239334128272	4.05326977546595
EYA2	VAE_depth1_8	Prostate	dominant	PTV_Misssense_CADD25	EYA2__VAE_depth1_8__Prostate__PTV_Misssense_CADD25__dominant	EYA2__VAE_depth1_8__Prostate	EYA2__Prostate	3.93650555148746	5.39835026352718
WRN	VAE_depth1_8	Prostate	dominant	PTV_Misssense_CADD25	WRN__VAE_depth1_8__Prostate__PTV_Misssense_CADD25__dominant	WRN__VAE_depth1_8__Prostate	WRN__Prostate	3.97313861530941	3.88468290022825
EXO1	VAE_depth1_10	Skin	dominant	PTV_Misssense_CADD25	EXO1__VAE_depth1_10__Skin__PTV_Misssense_CADD25__dominant	EXO1__VAE_depth1_10__Skin	EXO1__Skin	2.1523887335535	3.3617392742016
ATR	VAE_depth1_3	Skin	dominant	PTV_Misssense_CADD25	ATR__VAE_depth1_3__Skin__PTV_Misssense_CADD25__dominant	ATR__VAE_depth1_3__Skin	ATR__Skin	0.989078701903588	1.11359192333165
ATR	VAE_depth1_4	Skin	dominant	PTV_Misssense_CADD25	ATR__VAE_depth1_4__Skin__PTV_Misssense_CADD25__dominant	ATR__VAE_depth1_4__Skin	ATR__Skin	1.14131982199547	1.77548688291696
EXO1	VAE_depth1_6	Skin	dominant	PTV_Misssense_CADD25	EXO1__VAE_depth1_6__Skin__PTV_Misssense_CADD25__dominant	EXO1__VAE_depth1_6__Skin	EXO1__Skin	4.08568642032956	2.95501777397377
BRCA1	IC10	Breast	recessive	PTV	BRCA1__IC10__Breast__PTV__recessive	BRCA1__IC10__Breast	BRCA1__Breast	0.219422984215053	0.722811622876755
BRCA1	IC12	Breast	recessive	PTV	BRCA1__IC12__Breast__PTV__recessive	BRCA1__IC12__Breast	BRCA1__Breast	0.390373653317159	0.327738756286065
BRCA1	IC2	Breast	recessive	PTV	BRCA1__IC2__Breast__PTV__recessive	BRCA1__IC2__Breast	BRCA1__Breast	1.21981685530869	1.69756208002456
BRCA2	IC4	Breast	recessive	PTV	BRCA2__IC4__Breast__PTV__recessive	BRCA2__IC4__Breast	BRCA2__Breast	2.48717643127215	2.8294207482976
BRCA1	IC2	Pancan	recessive	PTV	BRCA1__IC2__Pancan__PTV__recessive	BRCA1__IC2__Pancan	BRCA1__Pancan	0.480073082924863	0.944474455087088
BRCA1	IC4	Pancan	recessive	PTV	BRCA1__IC4__Pancan__PTV__recessive	BRCA1__IC4__Pancan	BRCA1__Pancan	0.952558942594736	2.20682551961745
BRCA2	IC4	Pancan	recessive	PTV	BRCA2__IC4__Pancan__PTV__recessive	BRCA2__IC4__Pancan	BRCA2__Pancan	2.23512436521994	2.68045003737504
PALB2	IC4	Pancan	recessive	PTV	PALB2__IC4__Pancan__PTV__recessive	PALB2__IC4__Pancan	PALB2__Pancan	3.97925616345595	3.44569993706278
BRCA2	VAE_depth1_6	Breast	recessive	PTV	BRCA2__VAE_depth1_6__Breast__PTV__recessive	BRCA2__VAE_depth1_6__Breast	BRCA2__Breast	6.22511866677215	5.7426817445152
BRCA2	VAE_depth1_8	Breast	recessive	PTV	BRCA2__VAE_depth1_8__Breast__PTV__recessive	BRCA2__VAE_depth1_8__Breast	BRCA2__Breast	8.20657724614708	7.18437327833141
BRCA1	VAE_depth1_6	Pancan	recessive	PTV	BRCA1__VAE_depth1_6__Pancan__PTV__recessive	BRCA1__VAE_depth1_6__Pancan	BRCA1__Pancan	3.87222224862862	3.4584270821413
BRCA2	VAE_depth1_6	Pancan	recessive	PTV	BRCA2__VAE_depth1_6__Pancan__PTV__recessive	BRCA2__VAE_depth1_6__Pancan	BRCA2__Pancan	5.53985902021773	4.85084104811162
BRCA1	VAE_depth1_8	Pancan	recessive	PTV	BRCA1__VAE_depth1_8__Pancan__PTV__recessive	BRCA1__VAE_depth1_8__Pancan	BRCA1__Pancan	2.4711475497818	7.11621585844026
BRCA2	VAE_depth1_8	Pancan	recessive	PTV	BRCA2__VAE_depth1_8__Pancan__PTV__recessive	BRCA2__VAE_depth1_8__Pancan	BRCA2__Pancan	7.5017721710044	6.9093720028687
PALB2	VAE_depth1_8	Pancan	recessive	PTV	PALB2__VAE_depth1_8__Pancan__PTV__recessive	PALB2__VAE_depth1_8__Pancan	PALB2__Pancan	10.9324664293447	10.3604205776148
BRCA1	IC12	Breast	recessive	PTV_Misssense_CADD15	BRCA1__IC12__Breast__PTV_Misssense_CADD15__recessive	BRCA1__IC12__Breast	BRCA1__Breast	0.320363648004286	0.139008098926389
PER1	IC12	Breast	recessive	PTV_Misssense_CADD15	PER1__IC12__Breast__PTV_Misssense_CADD15__recessive	PER1__IC12__Breast	PER1__Breast	0.532216372524379	0.308686156647038
BRCA1	IC2	Breast	recessive	PTV_Misssense_CADD15	BRCA1__IC2__Breast__PTV_Misssense_CADD15__recessive	BRCA1__IC2__Breast	BRCA1__Breast	1.23052552788896	0.834987254179133
BRCA1	IC4	Breast	recessive	PTV_Misssense_CADD15	BRCA1__IC4__Breast__PTV_Misssense_CADD15__recessive	BRCA1__IC4__Breast	BRCA1__Breast	1.84124381679667	1.3602575128037
BRCA2	IC4	Breast	recessive	PTV_Misssense_CADD15	BRCA2__IC4__Breast__PTV_Misssense_CADD15__recessive	BRCA2__IC4__Breast	BRCA2__Breast	2.09179914149229	2.51132044620035
AQR	IC12	Pancan	recessive	PTV_Misssense_CADD15	AQR__IC12__Pancan__PTV_Misssense_CADD15__recessive	AQR__IC12__Pancan	AQR__Pancan	1.69177640566301	2.1253038726402
PER1	IC12	Pancan	recessive	PTV_Misssense_CADD15	PER1__IC12__Pancan__PTV_Misssense_CADD15__recessive	PER1__IC12__Pancan	PER1__Pancan	0.440026003323795	0.415452670006825
SETX	IC12	Pancan	recessive	PTV_Misssense_CADD15	SETX__IC12__Pancan__PTV_Misssense_CADD15__recessive	SETX__IC12__Pancan	SETX__Pancan	-0.98515279184738	-0.396730495896007
SMC1A	IC12	Pancan	recessive	PTV_Misssense_CADD15	SMC1A__IC12__Pancan__PTV_Misssense_CADD15__recessive	SMC1A__IC12__Pancan	SMC1A__Pancan	1.00006573295057	1.22782559214779
KDM6A	IC14	Pancan	recessive	PTV_Misssense_CADD15	KDM6A__IC14__Pancan__PTV_Misssense_CADD15__recessive	KDM6A__IC14__Pancan	KDM6A__Pancan	-0.0762650976405296	-0.293348926937861
REV3L	IC14	Pancan	recessive	PTV_Misssense_CADD15	REV3L__IC14__Pancan__PTV_Misssense_CADD15__recessive	REV3L__IC14__Pancan	REV3L__Pancan	-0.137619543014968	-0.239524714440712
BRCA1	IC2	Pancan	recessive	PTV_Misssense_CADD15	BRCA1__IC2__Pancan__PTV_Misssense_CADD15__recessive	BRCA1__IC2__Pancan	BRCA1__Pancan	0.635377485198788	0.561506386697568
BRCA1	IC4	Pancan	recessive	PTV_Misssense_CADD15	BRCA1__IC4__Pancan__PTV_Misssense_CADD15__recessive	BRCA1__IC4__Pancan	BRCA1__Pancan	1.29889253645414	1.56401954968019
BRCA2	IC4	Pancan	recessive	PTV_Misssense_CADD15	BRCA2__IC4__Pancan__PTV_Misssense_CADD15__recessive	BRCA2__IC4__Pancan	BRCA2__Pancan	1.53246327556262	2.28729133572651
PALB2	IC4	Pancan	recessive	PTV_Misssense_CADD15	PALB2__IC4__Pancan__PTV_Misssense_CADD15__recessive	PALB2__IC4__Pancan	PALB2__Pancan	3.17015955606241	2.4798364236996
CHD3	IC5	Pancan	recessive	PTV_Misssense_CADD15	CHD3__IC5__Pancan__PTV_Misssense_CADD15__recessive	CHD3__IC5__Pancan	CHD3__Pancan	0.784856600783712	0.541776638899363
FANCC	IC9	Pancan	recessive	PTV_Misssense_CADD15	FANCC__IC9__Pancan__PTV_Misssense_CADD15__recessive	FANCC__IC9__Pancan	FANCC__Pancan	1.69321738880276	1.6037864322666
BRCA2	VAE_depth1_6	Breast	recessive	PTV_Misssense_CADD15	BRCA2__VAE_depth1_6__Breast__PTV_Misssense_CADD15__recessive	BRCA2__VAE_depth1_6__Breast	BRCA2__Breast	5.5822646003894	4.82577750936815
BRCA1	VAE_depth1_8	Breast	recessive	PTV_Misssense_CADD15	BRCA1__VAE_depth1_8__Breast__PTV_Misssense_CADD15__recessive	BRCA1__VAE_depth1_8__Breast	BRCA1__Breast	4.25286579637673	4.2126077219581
BRCA2	VAE_depth1_8	Breast	recessive	PTV_Misssense_CADD15	BRCA2__VAE_depth1_8__Breast__PTV_Misssense_CADD15__recessive	BRCA2__VAE_depth1_8__Breast	BRCA2__Breast	7.1008858030587	6.74963507661117
BRCA1	VAE_depth1_8	Colon_Rectum	recessive	PTV_Misssense_CADD15	BRCA1__VAE_depth1_8__Colon_Rectum__PTV_Misssense_CADD15__recessive	BRCA1__VAE_depth1_8__Colon_Rectum	BRCA1__Colon_Rectum	4.29310085986917	3.88132577590331
BRCA1	VAE_depth1_8	Pancan	recessive	PTV_Misssense_CADD15	BRCA1__VAE_depth1_8__Pancan__PTV_Misssense_CADD15__recessive	BRCA1__VAE_depth1_8__Pancan	BRCA1__Pancan	3.63862529967885	4.96648828257178
BRCA2	VAE_depth1_8	Pancan	recessive	PTV_Misssense_CADD15	BRCA2__VAE_depth1_8__Pancan__PTV_Misssense_CADD15__recessive	BRCA2__VAE_depth1_8__Pancan	BRCA2__Pancan	5.3225716617421	6.26403314485085
PALB2	VAE_depth1_8	Pancan	recessive	PTV_Misssense_CADD15	PALB2__VAE_depth1_8__Pancan__PTV_Misssense_CADD15__recessive	PALB2__VAE_depth1_8__Pancan	PALB2__Pancan	8.67339077333146	7.60092099474306
AQR	VAE_depth1_9	Pancan	recessive	PTV_Misssense_CADD15	AQR__VAE_depth1_9__Pancan__PTV_Misssense_CADD15__recessive	AQR__VAE_depth1_9__Pancan	AQR__Pancan	4.48866954863142	5.35525080227148
COL7A1	VAE_depth1_9	Pancan	recessive	PTV_Misssense_CADD15	COL7A1__VAE_depth1_9__Pancan__PTV_Misssense_CADD15__recessive	COL7A1__VAE_depth1_9__Pancan	COL7A1__Pancan	1.94238794740671	1.2510822551339
BRCA1	IC12	Breast	recessive	PTV_Misssense_CADD25	BRCA1__IC12__Breast__PTV_Misssense_CADD25__recessive	BRCA1__IC12__Breast	BRCA1__Breast	0.318329750244648	0.323087510703585
BRCA1	IC2	Breast	recessive	PTV_Misssense_CADD25	BRCA1__IC2__Breast__PTV_Misssense_CADD25__recessive	BRCA1__IC2__Breast	BRCA1__Breast	1.2407602035979	1.69236746197351
BRCA1	IC4	Breast	recessive	PTV_Misssense_CADD25	BRCA1__IC4__Breast__PTV_Misssense_CADD25__recessive	BRCA1__IC4__Breast	BRCA1__Breast	1.83609816344764	2.12800171228612
BRCA2	IC4	Breast	recessive	PTV_Misssense_CADD25	BRCA2__IC4__Breast__PTV_Misssense_CADD25__recessive	BRCA2__IC4__Breast	BRCA2__Breast	2.5104305457647	2.88574748841589
BRCA1	IC2	Pancan	recessive	PTV_Misssense_CADD25	BRCA1__IC2__Pancan__PTV_Misssense_CADD25__recessive	BRCA1__IC2__Pancan	BRCA1__Pancan	0.747384689070696	0.792777126525434
BRCA1	IC4	Pancan	recessive	PTV_Misssense_CADD25	BRCA1__IC4__Pancan__PTV_Misssense_CADD25__recessive	BRCA1__IC4__Pancan	BRCA1__Pancan	1.42189546974103	2.0358143399406
BRCA2	IC4	Pancan	recessive	PTV_Misssense_CADD25	BRCA2__IC4__Pancan__PTV_Misssense_CADD25__recessive	BRCA2__IC4__Pancan	BRCA2__Pancan	2.26041523245753	2.56053638509952
PALB2	IC4	Pancan	recessive	PTV_Misssense_CADD25	PALB2__IC4__Pancan__PTV_Misssense_CADD25__recessive	PALB2__IC4__Pancan	PALB2__Pancan	3.16974056740771	3.4459622686407
BRCA2	VAE_depth1_6	Breast	recessive	PTV_Misssense_CADD25	BRCA2__VAE_depth1_6__Breast__PTV_Misssense_CADD25__recessive	BRCA2__VAE_depth1_6__Breast	BRCA2__Breast	6.59627692281151	5.61853352802972
BRCA1	VAE_depth1_8	Breast	recessive	PTV_Misssense_CADD25	BRCA1__VAE_depth1_8__Breast__PTV_Misssense_CADD25__recessive	BRCA1__VAE_depth1_8__Breast	BRCA1__Breast	4.25780387327726	6.84014330210283
BRCA2	VAE_depth1_8	Breast	recessive	PTV_Misssense_CADD25	BRCA2__VAE_depth1_8__Breast__PTV_Misssense_CADD25__recessive	BRCA2__VAE_depth1_8__Breast	BRCA2__Breast	8.72227665883526	7.47450988724604
BRCA1	VAE_depth1_8	Pancan	recessive	PTV_Misssense_CADD25	BRCA1__VAE_depth1_8__Pancan__PTV_Misssense_CADD25__recessive	BRCA1__VAE_depth1_8__Pancan	BRCA1__Pancan	3.59982940151208	6.68719095659405
BRCA2	VAE_depth1_8	Pancan	recessive	PTV_Misssense_CADD25	BRCA2__VAE_depth1_8__Pancan__PTV_Misssense_CADD25__recessive	BRCA2__VAE_depth1_8__Pancan	BRCA2__Pancan	7.73218520220588	6.68182175366655
PALB2	VAE_depth1_8	Pancan	recessive	PTV_Misssense_CADD25	PALB2__VAE_depth1_8__Pancan__PTV_Misssense_CADD25__recessive	PALB2__VAE_depth1_8__Pancan	PALB2__Pancan	8.6795273231106	10.3611251324819
COL7A1	VAE_depth1_9	Pancan	recessive	PTV_Misssense_CADD25	COL7A1__VAE_depth1_9__Pancan__PTV_Misssense_CADD25__recessive	COL7A1__VAE_depth1_9__Pancan	COL7A1__Pancan	2.89844986389872	2.38349761154207
